# Supplementary material for: Smaller global and regional carbon emissions from gross land use change when considering sub-grid secondary land cohorts in a global dynamic vegetation model
Source: Copernicus journal article supplement (doi:10.5194/bg-2017-329), 2017-09-04
Supplement: Supplementary file 1 [file bg-2017-329-supplement.zip]

Archive with 9 entries (9 files):
- Gross_LUC_Globe_v2_Supplment Mateiral.pdf
- data/Fig1_Fig3abc_ELUC_datat.xls
- data/Fig2_ELUC.csv
- data/Fig3def.xls
- data/Fig4abc_ELUC_spatial.nc
- data/Fig4def_ELUC_spatial.nc
- data/Fig5.xls
- data/Fig6.xls
- data/readme.txt
