# Supplementary material for: Smaller global and regional carbon emissions from gross land use change when considering sub-grid secondary land cohorts in a global dynamic vegetation model
Source: Copernicus journal article supplement (doi:10.5194/bg-2017-329), 2017-09-04
Supplement: Supplementary file 1 [file bg-2017-329-supplement.zip › data/Fig2_ELUC.csv]

	BLUE Lower C (Hansis et al., 2015)	Gasser & Ciais (2013)	Houghton (in prep)	Shevliakova et al (2013)	Stocker et al. (2014)	Wilkenskjeld et al. (2014)	This study (No age dynamics)	This study (With age dynamics)
1501
1502
1503	0.34				0.312
1504	0.361				0.388
1505	0.364				0.385		0.0488124979348	0.0418841529158
1506	0.363				0.357		0.0495181879052	0.0355518518332
1507	0.359				0.316		0.0534707037012	0.047072582874
1508	0.353				0.258		0.0539435020059	0.0456933092825
1509	0.345				0.203		0.0595279728345	0.0475589699901
1510	0.337				0.167		0.0664020679917	0.0530468474659
1511	0.329				0.156		0.0627873564065	0.0600847655377
1512	0.32				0.167		0.0610804441285	0.0488081210215
1513	0.311				0.187		0.0653811798508	0.053051971076
1514	0.302				0.204		0.056803586579	0.0514493922146
1515	0.293				0.207		0.0508556340102	0.0466680898908
1516	0.284				0.198		0.0566099640846	0.0372005421056
1517	0.276				0.186		0.0586651059358	0.0487762224351
1518	0.268				0.175		0.0484216601053	0.042602881391
1519	0.261				0.166		0.0603172498311	0.0453288626358
1520	0.253				0.172		0.0546146539801	0.0494333754212
1521	0.246				0.182		0.0562467818177	0.0602394086604
1522	0.24				0.201		0.0525934155269	0.0484645991353
1523	0.234				0.199		0.0588241069672	0.048886204492
1524	0.229				0.23		0.0495739285276	0.047517365804
1525	0.224				0.219		0.048170943906	0.0415939936788
1526	0.218				0.228		0.0437557175258	0.0255946415412
1527	0.213				0.22		0.0438734734494	0.0377338560252
1528	0.208				0.222		0.0450973554183	0.0376134159564
1529	0.203				0.207		0.0561387097033	0.0358158661058
1530	0.198				0.22		0.0585457066837	0.0332740095244
1531	0.193				0.246		0.0645889941047	0.0513591923966
1532	0.189				0.252		0.0707156173129	0.0388989951285
1533	0.185				0.259		0.0746446156464	0.0407382020462
1534	0.181				0.252		0.0682228275218	0.0421710991068
1535	0.178				0.25		0.074566047944	0.0440426196146
1536	0.174				0.22		0.0692099955556	0.0279309319966
1537	0.171				0.219		0.07184328027	0.0349727037749
1538	0.168				0.224		0.0660622672919	0.03580817348
1539	0.165				0.214		0.0695819191709	0.0397757988632
1540	0.163				0.206		0.0721895414559	0.041744318018
1541	0.16				0.203		0.0781028926945	0.0566661856096
1542	0.158				0.19		0.0723511798659	0.0479333142755
1543	0.155				0.186		0.077248201333	0.0542937347
1544	0.153				0.202		0.0731331730342	0.0499642298008
1545	0.151				0.212		0.0657541440732	0.0454523622524
1546	0.148				0.213		0.0620239112896	0.0301595869844
1547	0.146				0.203		0.0613797995741	0.0419030790312
1548	0.144				0.193		0.0569549315375	0.0316430967377
1549	0.143				0.178		0.0655472484941	0.0297260735013
1550	0.141				0.172		0.0628278027093	0.0380562399565
1551	0.139				0.176		0.0743454420239	0.0470107256263
1552	0.138				0.188		0.0784591491172	0.037976338937
1553	0.136				0.204		0.0737902023674	0.0402400496848
1554	0.135				0.202		0.0676356585164	0.040093260605
1555	0.133				0.226		0.0720161627704	0.0297853822698
1556	0.132				0.212		0.0601020979742	0.022943635079
1557	0.131				0.22		0.0650911412126	0.0368364190957
1558	0.129				0.212		0.0739731754188	0.0457127135016
1559	0.127				0.218		0.0785664583924	0.0489495805822
1560	0.126				0.201		0.0779684882152	0.0478250428274
1561	0.125				0.207		0.094555262681	0.0653248654484
1562	0.123				0.225		0.0894948491656	0.0581417970965
1563	0.122				0.229		0.07783148138	0.0512292508672
1564	0.121				0.233		0.076823197542	0.0492414743614
1565	0.12				0.23		0.0742831975038	0.058817420529
1566	0.119				0.232		0.0598275589668	0.039028491567
1567	0.118				0.202		0.0627899832991	0.0445040180756
1568	0.117				0.199		0.0773605837765	0.0505532062531
1569	0.116				0.199		0.0775864051039	0.0529951297273
1570	0.114				0.182		0.0837165917929	0.0459539767883
1571	0.113				0.169		0.0895172672487	0.0694726385727
1572	0.112				0.164		0.0902389920432	0.0573087605326
1573	0.111				0.142		0.079251555274	0.041547820302
1574	0.11				0.131		0.077423603771	0.0417032774608
1575	0.109				0.14		0.070752600169	0.0398373640202
1576	0.108				0.149		0.0609837910068	0.01734639941
1577	0.107				0.145		0.0650101013876	0.0310282085458
1578	0.106				0.136		0.0682304338922	0.0473115208183
1579	0.105				0.127		0.0710153309524	0.0441740318735
1580	0.104				0.114		0.0734209253574	0.0446765951875
1581	0.104				0.108		0.0885264058678	0.0659741670637
1582	0.103				0.113		0.0810037236727	0.0556154968341
1583	0.102				0.123		0.0749530546962	0.0399767942462
1584	0.102				0.135		0.0708330938956	0.0404687200712
1585	0.101				0.134		0.0701337423576	0.0404998145964
1586	0.101				0.159		0.0554674356748	0.013194555975
1587	0.101				0.143		0.059699416898	0.027275676772
1588	0.1				0.145		0.0648958391091	0.0331287271312
1589	0.099				0.135		0.0646966465789	0.0377003765138
1590	0.099				0.134		0.0677126632111	0.0368791279636
1591	0.098				0.115		0.0765830725893	0.0617474615676
1592	0.098				0.127		0.0767006450121	0.0414040570334
1593	0.097				0.149		0.0706505443638	0.0354182150092
1594	0.097				0.157		0.0717319802192	0.0311749813074
1595	0.096				0.164		0.0667883151556	0.02706681717
1596	0.096				0.155		0.0586456477204	0.0081927350116
1597	0.095				0.15		0.0587752131264	0.0332790023052
1598	0.095				0.118		0.0639763010813	0.0428092828676
1599	0.095				0.108		0.0626092364791	0.0455966533616
1600	0.096				0.101		0.0725469922067	0.0516900537244
1601	0.099				0.083		0.0888280455315	0.0665898667482
1602	0.102				0.072		0.0844106129473	0.0476804772404
1603	0.105				0.072		0.083968899049	0.0399883501966
1604	0.109				0.062		0.0862119390084	0.039186812358
1605	0.111				0.061		0.0725324413272	0.0405460050116
1606	0.113				0.08		0.0596148037354	0.0261329356716
1607	0.114				0.091		0.0645142209889	0.04260716177
1608	0.115				0.083		0.0695187057673	0.0560692749662
1609	0.116				0.073		0.0680934275811	0.0505792059666
1610	0.117				0.065		0.0716038754797	0.0464828742754
1611	0.118				0.052		0.0781188174187	0.0602388186524
1612	0.118				0.042		0.0761076985628	0.0427512381302
1613	0.119				0.046		0.0689102907246	0.0273948828756
1614	0.119				0.053		0.068955236886	0.0294316706624
1615	0.12				0.061		0.0689681788302	0.0303662223586
1616	0.121				0.056		0.054817026631	0.0171868521232
1617	0.121				0.082		0.0505220584963	0.0278759611824
1618	0.121				0.069		0.0542894758822	0.0425861990055
1619	0.121				0.076		0.0537302744958	0.0402317190101
1620	0.122				0.072		0.0614922299902	0.0400284089845
1621	0.122				0.075		0.0765783428826	0.0616257918075
1622	0.122				0.06		0.082444537561	0.0566719989939
1623	0.123				0.075		0.0845354354344	0.0461376540638
1624	0.123				0.097		0.0822192937896	0.045593041201
1625	0.123				0.103		0.0735003793166	0.0439527501268
1626	0.123				0.108		0.063450035048	0.019509644447
1627	0.124				0.102		0.0650198573387	0.019245419548
1628	0.124				0.102		0.0544147475793	0.017959192396
1629	0.124				0.073		0.0591174012239	0.0341868724682
1630	0.124				0.072		0.0651285434989	0.0408023345398
1631	0.125				0.073		0.0745414877773	0.0511581815308
1632	0.125				0.055		0.0659242616881	0.046243119943
1633	0.125				0.044		0.0827390183866	0.0517353928392
1634	0.125				0.04		0.0749625573114	0.0377897765306
1635	0.125				0.026		0.0714871234626	0.0300655355136
1636	0.125				0.022		0.0565828755914	0.0191443048368
1637	0.125				0.04		0.0578175746703	0.0313604480206
1638	0.125				0.046		0.0416661572158	0.0271902935648
1639	0.125				0.037		0.0494317600768	0.0305517490896
1640	0.125				0.019		0.0577842668634	0.0343167508408
1641	0.126				0.003		0.066662044795	0.053734446045
1642	0.126				-0.011		0.071687079356	0.0469043111782
1643	0.126				-0.014		0.0738466107228	0.0452766750204
1644	0.126				0.001		0.0686166760228	0.0391891781672
1645	0.126				0.021		0.0536646231524	0.0397193449698
1646	0.126				0.039		0.051568316724	0.024046110205
1647	0.126				0.038		0.0510278699581	0.032990965648
1648	0.126				0.066		0.0521665379304	0.0317592000659
1649	0.127				0.05		0.0546467674586	0.0494572543283
1650	0.127				0.053		0.0653717873358	0.0458193985077
1651	0.127				0.047		0.0733475952914	0.0646972266519
1652	0.127				0.052		0.0710634299714	0.0470515959473
1653	0.127				0.038		0.0701199347084	0.0565348702098
1654	0.127				0.057		0.068335375797	0.0430936880582
1655	0.127				0.079		0.0575589303972	0.0450366351612
1656	0.128				0.088		0.0459183610656	0.0230043986954
1657	0.128				0.093		0.0471513807452	0.0379983061057
1658	0.128				0.087		0.0455622092913	0.0311126452599
1659	0.128				0.086		0.0499258423769	0.0365458173719
1660	0.128				0.055		0.0701460216019	0.0420790183393
1661	0.128				0.053		0.0816950007561	0.0581276766567
1662	0.128				0.057		0.0787932789078	0.0472915340951
1663	0.128				0.037		0.0888006063946	0.0614127687436
1664	0.128				0.027		0.085709347304	0.054088991874
1665	0.128				0.032		0.0689153171782	0.0493410011582
1666	0.129				0.018		0.0614787960536	0.0369515305638
1667	0.129				0.014		0.0623743193842	0.0475423336046
1668	0.129				0.027		0.0557350796657	0.0369782428799
1669	0.129				0.035		0.0489533363717	0.0470276268621
1670	0.129				0.026		0.0607019006429	0.0486400431485
1671	0.129				0.015		0.0655120090007	0.0605236840361
1672	0.129				0.004		0.0670212647027	0.0468588203861
1673	0.129				0.0		0.0696420860428	0.057794337282
1674	0.129				-0.003		0.0773564647082	0.0480534082876
1675	0.129				0.006		0.0576600634558	0.0395349909304
1676	0.129				0.02		0.0601860545184	0.0245005954834
1677	0.129				0.035		0.0585020532065	0.038187211528
1678	0.129				0.033		0.0595937586054	0.027032977617
1679	0.129				0.057		0.0587703731092	0.036081813107
1680	0.129				0.038		0.0790996579252	0.05034525925
1681	0.129				0.038		0.0770544213426	0.0688183758028
1682	0.129				0.035		0.0703554115338	0.0618573863584
1683	0.129				0.036		0.0849698881536	0.0734002434016
1684	0.129				0.03		0.0888907369546	0.0602428723952
1685	0.129				0.05		0.0771368979268	0.0515390006628
1686	0.129				0.079		0.075079420687	0.037000733603
1687	0.129				0.086		0.0728609962589	0.0454936088022
1688	0.129				0.097		0.0612962906143	0.0377966038875
1689	0.129				0.089		0.0555800917965	0.0533308685161
1690	0.129				0.093		0.0688275929431	0.0585419663079
1691	0.129				0.068		0.0708920897701	0.0732635814949
1692	0.129				0.072		0.083413509918	0.0590136585742
1693	0.129				0.075		0.0851956054624	0.0779912858304
1694	0.129				0.058		0.0853476473048	0.0655888501174
1695	0.129				0.048		0.0659760395324	0.0619341764362
1696	0.129				0.044		0.0667321953682	0.0416433364006
1697	0.129				0.026		0.0597634842625	0.044282624108
1698	0.129				0.022		0.0576063837045	0.0178966027301
1699	0.129				0.031		0.0599367792723	0.0222794241275
1700	0.137				0.037		0.0807979488119	0.0227394449307
1701	0.147				0.032		0.0817897104477	0.0448551293291
1702	0.159				0.019		0.07969922823	0.0435865458315
1703	0.171	0.171			0.007		0.09465207655	0.0665276176668
1704	0.185	0.181			0.004		0.0977387118398	0.061153997646
1705	0.191	0.182			0.003		0.0848959241192	0.0622159535806
1706	0.196	0.181			0.014		0.0868394639296	0.0433952876662
1707	0.199	0.179			0.033		0.083816531729	0.0504541824683
1708	0.201	0.18			0.055		0.0719047612173	0.0273916138093
1709	0.204	0.181			0.056		0.0613884767505	0.0350704802457
1710	0.204	0.184			0.083		0.0617383790119	0.0214879925167
1711	0.203	0.186			0.066		0.0604566533965	0.0407404234401
1712	0.202	0.189			0.066		0.0667382779479	0.0214381834002
1713	0.201	0.19			0.057		0.0686755304966	0.0414707212086
1714	0.2	0.19			0.062		0.0756716228576	0.0342439327956
1715	0.2	0.191			0.048		0.0703868098842	0.0451958115662
1716	0.201	0.191			0.067		0.072635332638	0.0309805183926
1717	0.202	0.192			0.094		0.0660441130865	0.0470764946982
1718	0.203	0.193			0.1		0.0716067013922	0.0382866270718
1719	0.204	0.194			0.106		0.0586866948574	0.0410690065272
1720	0.205	0.196			0.106		0.0707662836664	0.0343294345484
1721	0.205	0.197			0.11		0.059887574424	0.04079511942
1722	0.205	0.198			0.079		0.0623225272796	0.0316181645105
1723	0.204	0.199			0.08		0.0526905983894	0.0392926014476
1724	0.203	0.2			0.081		0.071571573257	0.0388045280904
1725	0.203	0.201			0.063		0.054565495898	0.0401069551122
1726	0.203	0.202			0.056		0.0634670706328	0.0350049765686
1727	0.203	0.203			0.057		0.0631539591284	0.0522122674831
1728	0.203	0.202			0.047		0.0657750900082	0.0460888667585
1729	0.203	0.2			0.051		0.055379520966	0.0493949449931
1730	0.205	0.198			0.071		0.068105673481	0.0543119133115
1731	0.209	0.196			0.084		0.0677455270512	0.0617076258501
1732	0.212	0.194			0.078		0.07242044628	0.0431020393361
1733	0.216	0.194			0.065		0.0740882261212	0.052835570627
1734	0.22	0.194			0.049		0.089746203843	0.0558375116992
1735	0.222	0.195			0.037		0.0790261298888	0.057930753979
1736	0.224	0.196			0.032		0.0791813392694	0.0448186082656
1737	0.226	0.196			0.05		0.0813690798474	0.0715014925188
1738	0.227	0.198			0.068		0.0877422962542	0.0589250004257
1739	0.228	0.2			0.091		0.081959038904	0.0559426850259
1740	0.228	0.202			0.093		0.0955040806206	0.0532789930757
1741	0.229	0.204			0.122		0.104283986985	0.0823004719221
1742	0.23	0.206			0.102		0.104191485805	0.0650078970449
1743	0.23	0.208			0.107		0.108783220241	0.0808942612252
1744	0.23	0.209			0.094		0.118430394588	0.0881047840228
1745	0.231	0.21			0.094		0.109950468201	0.0955108860624
1746	0.231	0.21			0.082		0.0942029035014	0.0713814811866
1747	0.231	0.211			0.105		0.109519048802	0.0905885581832
1748	0.232	0.214			0.138		0.11115577192	0.0837303870158
1749	0.232	0.218			0.151		0.0981904132145	0.0818782320726
1750	0.232	0.221			0.162		0.11316573105	0.0805760981272
1751	0.233	0.225			0.157		0.126643767922	0.095578768802
1752	0.233	0.229			0.152		0.120921163563	0.0767311513652
1753	0.234	0.231			0.113		0.121406040205	0.08159028516
1754	0.234	0.233			0.114		0.138435931144	0.0854459123234
1755	0.235	0.234			0.119		0.126266119501	0.07790491958
1756	0.235	0.236			0.101		0.122330775185	0.0788134014226
1757	0.235	0.237			0.097		0.13455996559	0.100099074976
1758	0.235	0.238			0.097		0.126183091575	0.101011177341
1759	0.235	0.24			0.077		0.118694027565	0.0964216918905
1760	0.236	0.241			0.077		0.130070275215	0.108276192432
1761	0.237	0.243			0.093		0.137954076918	0.116045389182
1762	0.239	0.244			0.099		0.124702301775	0.106196382149
1763	0.24	0.245			0.094		0.133594434293	0.11660692905
1764	0.241	0.247			0.082		0.151025746969	0.131344659697
1765	0.242	0.248			0.057		0.138089620885	0.128101036118
1766	0.242	0.249			0.044		0.128666274732	0.118296867295
1767	0.243	0.249			0.037		0.135399109506	0.130772081574
1768	0.243	0.248			0.05		0.142801225594	0.124224830073
1769	0.243	0.245			0.064		0.121114613672	0.118732347461
1770	0.246	0.243			0.093		0.147349173174	0.126068824894
1771	0.25	0.24			0.101		0.15670675264	0.132113461202
1772	0.255	0.237			0.145		0.158333370421	0.121740436203
1773	0.261	0.236			0.139		0.160725856787	0.136102152529
1774	0.266	0.236			0.152		0.186849589356	0.153294148704
1775	0.269	0.237			0.147		0.168265379951	0.144599923373
1776	0.272	0.237			0.147		0.174925250193	0.156584764742
1777	0.273	0.237			0.131		0.187642833745	0.175812016656
1778	0.275	0.24			0.148		0.194190900619	0.176098259239
1779	0.276	0.244			0.179		0.183170024604	0.172468164834
1780	0.277	0.248			0.186		0.207356434999	0.187041161884
1781	0.277	0.252			0.189		0.201888975186	0.17529994918
1782	0.278	0.257			0.179		0.193929185277	0.162436442017
1783	0.278	0.259			0.171		0.198540842657	0.16800090979
1784	0.279	0.261			0.128		0.213613795502	0.172123067777
1785	0.279	0.262			0.13		0.188452112119	0.165016499546
1786	0.28	0.263			0.14		0.204499284342	0.170424240439
1787	0.281	0.264			0.128		0.21057833911	0.180770609037
1788	0.281	0.265			0.123		0.213137014286	0.170585079939
1789	0.282	0.265			0.124		0.194987401885	0.161922816461
1790	0.284	0.266			0.105		0.219367790451	0.167643095078
1791	0.287	0.266			0.106		0.201417652437	0.153431617463
1792	0.291	0.266			0.121		0.188684733671	0.140137383801
1793	0.294	0.267			0.128		0.187135677799	0.139273840675
1794	0.298	0.267			0.125		0.208276486619	0.145798447339
1795	0.3	0.268			0.117		0.183645183043	0.131101477044
1796	0.302	0.269			0.094		0.191261898178	0.142584164804
1797	0.303	0.269			0.078		0.201077975469	0.152781442882
1798	0.304	0.279			0.08		0.19020989627	0.14946804758
1799	0.305	0.292			0.095		0.176108169749	0.143242022303
1800	0.307	0.306			0.105		0.196448767442	0.151844110625
1801	0.311	0.321			0.132		0.193484213243	0.143460671265
1802	0.315	0.336			0.134		0.192264115375	0.143031597689
1803	0.32	0.343			0.164		0.200871733153	0.158560464981
1804	0.326	0.348			0.15		0.218638113676	0.172302014035
1805	0.33	0.351			0.161		0.198537089594	0.162551072818
1806	0.333	0.355			0.152		0.209540963578	0.182357987269
1807	0.336	0.358			0.158		0.219635972151	0.191193944555
1808	0.338	0.365			0.152		0.221299780406	0.182243404991
1809	0.34	0.374			0.178		0.20166917604	0.184596592826
1810	0.345	0.383			0.219		0.236760595641	0.209557005192
1811	0.351	0.393			0.238		0.236033900596	0.206431622083
1812	0.359	0.403			0.254		0.238907000514	0.199256627478
1813	0.366	0.408			0.252		0.243495067451	0.205576756186
1814	0.374	0.413			0.25		0.264838417534	0.208135651983
1815	0.379	0.417			0.208		0.232948516887	0.190265522625
1816	0.383	0.421			0.214		0.23572117329	0.194814006866
1817	0.387	0.425			0.217		0.237944734902	0.20414061141
1818	0.389	0.426			0.199		0.229145611915	0.19783403261
1819	0.392	0.428			0.193		0.216703950652	0.189578520153
1820	0.4	0.429			0.197		0.250330856869	0.209694199761
1821	0.411	0.431			0.186		0.254345973491	0.214438424202
1822	0.424	0.432			0.2		0.254066769998	0.21941379148
1823	0.437	0.435			0.226		0.264283285881	0.237583412442
1824	0.451	0.439			0.244		0.290360283837	0.257523957839
1825	0.459	0.442			0.238		0.26577223444	0.249094032117
1826	0.465	0.445			0.223		0.275205962334	0.256676160812
1827	0.469	0.448			0.183		0.29201793779	0.263238352739
1828	0.473	0.452			0.163		0.300174470021	0.262721714048
1829	0.477	0.456			0.163		0.288467184412	0.26484408493
1830	0.485	0.461			0.187		0.323305844349	0.286568276611
1831	0.496	0.466			0.203		0.329719948509	0.296443253044
1832	0.508	0.471			0.249		0.333265550128	0.301472365517
1833	0.52	0.475			0.265		0.348870860708	0.318727895856
1834	0.534	0.48			0.31		0.371716707792	0.330320051805
1835	0.542	0.483			0.299		0.353637113424	0.315326324539
1836	0.548	0.487			0.307		0.354389685646	0.31788711029
1837	0.554	0.49			0.29		0.366580827947	0.323348518981
1838	0.559	0.493			0.3		0.358259010044	0.320911108159
1839	0.564	0.496			0.277		0.347379425031	0.317992830554
1840	0.574	0.499			0.306		0.382021013917	0.343028546195
1841	0.586	0.502			0.363		0.386146806478	0.339048527089
1842	0.599	0.504			0.39		0.371385124153	0.340589485333
1843	0.613	0.507			0.395		0.387520769347	0.343500244648
1844	0.626	0.511			0.409		0.411243403805	0.345901472783
1845	0.635	0.514			0.406		0.374736617996	0.317028172929
1846	0.641	0.517			0.36		0.377614239374	0.324759164604
1847	0.646	0.52			0.365		0.396533696981	0.329294232316
1848	0.651	0.525			0.371		0.385643658085	0.32244537072
1849	0.654	0.532			0.351		0.367925233556	0.327532900202
1850	0.657	0.539			0.358		0.400985942288	0.361073903824
1851	0.659	0.546			0.362		0.40683390936	0.353157182495
1852	0.662	0.553	0.8		0.362		0.399941922141	0.353122205985
1853	0.664	0.557	0.802		0.393	0.458	0.415249492607	0.371835623651
1854	0.667	0.561	0.804		0.429	0.512	0.444152859224	0.385526590866
1855	0.67	0.565	0.802		0.436	0.526	0.417932938681	0.368617623335
1856	0.674	0.567	0.803		0.434	0.552	0.424713114982	0.384236213712
1857	0.678	0.57	0.808		0.417	0.578	0.442746767461	0.39542718637
1858	0.682	0.567	0.815		0.365	0.602	0.441885901665	0.401845801504
1859	0.685	0.568	0.826		0.333	0.62	0.425676102854	0.401399340912
1860	0.684	0.57	0.818		0.347	0.63	0.46772534347	0.438049499408
1861	0.682	0.571	0.808		0.376	0.63	0.46008595225	0.427319033122
1862	0.678	0.572	0.797		0.378	0.626	0.442793121651	0.417253036969
1863	0.673	0.578	0.784	0.5195	0.422	0.622	0.45084913141	0.409797545217
1864	0.666	0.581	0.768	0.555	0.445	0.622	0.456008487718	0.404389415878
1865	0.663	0.582	0.769	0.6425	0.485	0.622	0.406206434351	0.362439518401
1866	0.661	0.584	0.767	0.728	0.467	0.622	0.399410010992	0.365994315297
1867	0.659	0.585	0.766	0.6815	0.47	0.626	0.409750784389	0.363997498179
1868	0.657	0.591	0.764	0.825	0.428	0.626	0.393039013792	0.356995039782
1869	0.656	0.598	0.761	0.878	0.42	0.638	0.374875590386	0.348288054172
1870	0.675	0.608	0.774	0.939	0.405	0.662	0.402317893015	0.362581509459
1871	0.704	0.618	0.789	0.9625	0.452	0.69	0.407114619866	0.361611588718
1872	0.737	0.629	0.805	1.257	0.535	0.718	0.401968681137	0.368582058286
1873	0.775	0.637	0.821	1.078	0.602	0.75	0.425563348219	0.381724066107
1874	0.816	0.653	0.84	1.074	0.63	0.77	0.460276451665	0.412384951272
1875	0.838	0.671	0.845	0.9745	0.65	0.784	0.446532557996	0.411073133832
1876	0.853	0.689	0.85	0.987	0.632	0.792	0.464287013272	0.44600384574
1877	0.865	0.708	0.856	0.9035	0.58	0.796	0.49026335716	0.477094908056
1878	0.875	0.737	0.864	1.0515	0.589	0.8	0.493576169454	0.494133622553
1879	0.884	0.762	0.871	0.974	0.586	0.804	0.48833983928	0.493991446657
1880	0.898	0.785	0.873	1.166	0.576	0.806	0.536953163139	0.538088602338
1881	0.915	0.808	0.876	1.2355	0.598	0.812	0.530217936355	0.521145739221
1882	0.932	0.831	0.877	1.334	0.607	0.808	0.521548089367	0.505113435386
1883	0.949	0.844	0.878	1.519	0.628	0.808	0.536587621997	0.501845958065
1884	0.967	0.853	0.879	1.689	0.68	0.814	0.556178071775	0.51099807027
1885	0.977	0.862	0.882	1.5335	0.711	0.824	0.523170571983	0.488209166735
1886	0.985	0.87	0.883	1.4555	0.706	0.832	0.539954559267	0.502580352935
1887	0.992	0.878	0.883	1.4645	0.704	0.846	0.561782814513	0.532921614205
1888	0.997	0.872	0.883	1.273	0.668	0.866	0.567527612402	0.556925986353
1889	1.002	0.862	0.881	1.07	0.6	0.878	0.567999502011	0.569768781676
1890	1.006	0.85	0.882	1.102	0.553	0.878	0.628750041061	0.600211859597
1891	1.007	0.835	0.883	1.1705	0.599	0.876	0.632426313286	0.595830797422
1892	1.009	0.82	0.884	1.0615	0.657	0.886	0.623479292428	0.585990627387
1893	1.01	0.818	0.889	1.0775	0.649	0.884	0.644404483195	0.59477841296
1894	1.011	0.819	0.893	1.2715	0.707	0.876	0.667511672118	0.606257594072
1895	1.013	0.822	0.894	1.0875	0.761	0.87	0.62841879087	0.604885583625
1896	1.017	0.826	0.895	1.1935	0.813	0.87	0.654499488202	0.633615847017
1897	1.021	0.83	0.895	1.1365	0.793	0.862	0.679496605551	0.65109629348
1898	1.025	0.849	0.894	1.224	0.815	0.864	0.681385073311	0.658962210461
1899	1.029	0.908	0.895	1.208	0.774	0.896	0.67914703464	0.660931676943
1900	1.058	0.982	0.898	1.475	0.784	0.95	0.733204531537	0.681026680521
1901	1.098	1.061	0.907	1.3785	0.77	0.998	0.707617604449	0.672722708542
1902	1.144	1.144	0.921	1.5865	0.85	1.046	0.710788778452	0.681399169319
1903	1.194	1.217	0.939	1.601	0.974	1.092	0.72364205445	0.68401031655
1904	1.245	1.252	0.961	1.424	1.075	1.11	0.747515749283	0.698212730379
1905	1.271	1.275	0.989	1.2765	1.1	1.112	0.705833413798	0.67604305711
1906	1.289	1.294	1.017	1.383	1.142	1.114	0.743813925361	0.694179564829
1907	1.301	1.312	1.041	1.3365	1.097	1.098	0.757669109015	0.708475746833
1908	1.311	1.318	1.062	1.375	1.02	1.088	0.749115768886	0.714639256166
1909	1.32	1.319	1.077	1.5485	1.011	1.102	0.735582843674	0.722988751917
1910	1.333	1.317	1.079	1.87	0.998	1.1	0.780902402412	0.764225611003
1911	1.345	1.314	1.081	1.724	0.978	1.108	0.754374999958	0.741323508446
1912	1.356	1.309	1.081	1.7895	1.017	1.136	0.701000104227	0.681403119675
1913	1.365	1.313	1.081	1.882	1.031	1.166	0.696200954747	0.672574204938
1914	1.372	1.319	1.08	1.862	1.064	1.164	0.696313123858	0.660857397259
1915	1.372	1.322	1.087	1.9015	1.131	1.176	0.676284396156	0.658780524824
1916	1.37	1.327	1.093	1.873	1.156	1.186	0.698014145657	0.698905467629
1917	1.367	1.332	1.099	1.8355	1.128	1.176	0.750035373393	0.768474630034
1918	1.364	1.354	1.107	1.859	1.098	1.152	0.722976824415	0.761002529913
1919	1.36	1.385	1.118	1.964	1.037	1.168	0.66540050611	0.701630131154
1920	1.365	1.422	1.118	1.738	0.934	1.19	0.646345668954	0.686183230627
1921	1.376	1.459	1.118	1.8535	0.851	1.202	0.640827703008	0.660570674664
1922	1.391	1.497	1.117	1.7855	0.908	1.248	0.621915821155	0.650585138263
1923	1.41	1.518	1.115	1.7525	0.994	1.292	0.662517878412	0.668194442732
1924	1.432	1.533	1.112	1.731	1.002	1.314	0.705192733864	0.710329486698
1925	1.446	1.545	1.129	1.6915	1.099	1.32	0.742343167497	0.727664080821
1926	1.456	1.547	1.146	1.9125	1.178	1.332	0.774298534519	0.762233535647
1927	1.462	1.546	1.161	2.0285	1.235	1.348	0.770835391658	0.753197192683
1928	1.467	1.541	1.177	1.711	1.221	1.368	0.771116564376	0.759523954237
1929	1.47	1.54	1.199	1.6795	1.228	1.424	0.796800059441	0.791435019603
1930	1.482	1.538	1.218	1.985	1.167	1.494	0.80877547516	0.795459736149
1931	1.496	1.543	1.23	1.687	1.142	1.554	0.823605267424	0.830507944772
1932	1.511	1.55	1.229	1.625	1.128	1.62	0.848286702998	0.841368088976
1933	1.528	1.559	1.224	1.983	1.148	1.672	0.894327551162	0.886050885259
1934	1.547	1.565	1.207	1.907	1.236	1.714	0.923471622175	0.915499918558
1935	1.556	1.57	1.182	1.782	1.279	1.734	0.983171868916	0.985449385847
1936	1.564	1.578	1.161	1.9095	1.265	1.78	0.987812587791	0.974368809994
1937	1.571	1.587	1.152	1.8465	1.211	1.808	1.04749167511	1.02925796544
1938	1.576	1.604	1.14	1.889	1.208	1.842	0.987286502953	0.976046960462
1939	1.581	1.622	1.12	2.2355	1.225	1.838	1.02565926415	1.01424385428
1940	1.58	1.64	1.12	2.0745	1.239	1.82	1.04174002184	1.02811657264
1941	1.576	1.655	1.122	2.095	1.331	1.802	1.14430058693	1.11708725439
1942	1.57	1.671	1.132	2.374	1.382	1.782	1.18566061867	1.15135570987
1943	1.562	1.679	1.148	2.1535	1.339	1.736	1.28050128623	1.26154249564
1944	1.552	1.686	1.177	1.922	1.325	1.734	1.25653938182	1.22405861568
1945	1.545	1.693	1.183	1.862	1.31	1.754	1.27891699107	1.24343463293
1946	1.539	1.7	1.187	1.776	1.274	1.742	1.22945121099	1.21877441287
1947	1.533	1.704	1.186	1.8025	1.236	1.69	1.26407782789	1.26549591285
1948	1.527	1.743	1.186	1.9005	1.265	1.698	1.26927869103	1.25109336204
1949	1.521	1.757	1.242	2.1495	1.288	1.774	1.28654234564	1.25679135086
1950	1.61	1.76	1.301	2.457	1.332	1.922	1.28303144307	1.25697015404
1951	1.74	1.764	1.377	2.7685	1.331	2.12	1.28959185462	1.28660221786
1952	1.895	1.776	1.465	2.8865	1.336	2.374	1.27512388819	1.28276417804
1953	2.066	1.751	1.566	3.1705	1.447	2.634	1.25386783625	1.26083583978
1954	2.25	1.752	1.624	3.0985	1.503	2.762	1.34528762107	1.38615904535
1955	2.348	1.765	1.699	3.531	1.691	2.824	1.42506588698	1.46493546441
1956	2.412	1.755	1.773	3.663	1.842	2.866	1.51126763215	1.5428044177
1957	2.458	1.734	1.801	3.787	1.942	2.882	1.49526527858	1.51531271498
1958	2.493	1.729	1.818	3.6245	1.949	2.892	1.54980428032	1.57300147729
1959	2.52	1.733	1.811	3.4425	2.013	2.8	1.55155493919	1.58317512833
1960	2.427	1.733	1.786	2.72	1.907	2.582	1.56804687541	1.61591056124
1961	2.289	1.754	1.735	2.295	1.841	2.362	1.49161286063	1.47318771723
1962	2.123	1.78	1.725	1.5875	1.74	2.162	1.51643932517	1.48182946762
1963	1.939	1.785	1.715	1.558	1.71	1.956	1.5075568882	1.47326260846
1964	1.741	1.782	1.71	1.5525	1.618	1.868	1.4585546064	1.36697107144
1965	1.646	1.779	1.712	1.727	1.519	1.936	1.35083316918	1.23982476382
1966	1.584	1.776	1.717	1.724	1.521	1.906	1.35026815114	1.27064976959
1967	1.539	1.77	1.717	1.8455	1.633	1.864	1.30832366159	1.22643666279
1968	1.502	1.733	1.709	1.6315	1.659	1.848	1.34529537299	1.21861432274
1969	1.47	1.683	1.689	1.5845	1.633	1.866	1.35559157562	1.22963914811
1970	1.434	1.632	1.653	1.2815	1.7	1.802	1.3980277953	1.25392560021
1971	1.396	1.582	1.599	1.1745	1.673	1.824	1.4171884363	1.23171345541
1972	1.359	1.535	1.537	1.1045	1.605	1.858	1.43056742719	1.23893942195
1973	1.323	1.518	1.475	1.2395	1.684	1.852	1.39296402844	1.18880097869
1974	1.291	1.516	1.418	1.3015	1.728	1.8	1.43259691459	1.23118498601
1975	1.269	1.514	1.371	1.3595	1.804	1.818	1.4264239158	1.20162985066
1976	1.253	1.519	1.354	1.561	1.725	1.826	1.50438605478	1.31237061633
1977	1.241	1.526	1.337	1.5335	1.811	1.844	1.50531224434	1.30583931294
1978	1.232	1.539	1.321	1.447	1.756	1.846	1.54565561035	1.36890003269
1979	1.224	1.598	1.307	1.395	1.719	1.906	1.5072720396	1.32437661912
1980	1.232	1.676	1.286	1.7035	1.555	2.006	1.52423503977	1.33444199772
1981	1.248	1.75	1.252	1.5215	1.638	2.088	1.439259595	1.24585390286
1982	1.27	1.826	1.235	1.732	1.524	2.142	1.53185411043	1.34647889438
1983	1.295	1.901	1.238	1.8225	1.489	2.188	1.4649626523	1.25563767688
1984	1.324	1.928	1.242	1.893	1.547	2.212	1.56436906471	1.35596198797
1985	1.341	1.941	1.255	1.566	1.627	2.194	1.64631093381	1.46526408855
1986	1.355	1.953	1.269	1.485	1.56	2.186	1.72401171062	1.524254032
1987	1.369	1.96	1.272	1.381	1.571	2.178	1.71389004305	1.51678290409
1988	1.383	1.936	1.265	1.593	1.577	2.152	1.75050023691	1.56163012632
1989	1.396	1.895	1.277	1.588	1.574	2.144	1.78854301711	1.60988261211
1990	1.385	1.847	1.31	1.5915	1.567	2.128	1.81346054502	1.6067759616
1991	1.36	1.797	1.339	1.727	1.588	2.15	1.75276609388	1.54805507311
1992	1.323	1.745	1.374	1.583	1.661	2.164	1.76368396786	1.52739087312
1993	1.276	1.724	1.409	1.371	1.522	2.144	1.86476435887	1.64429277189
1994	1.221	1.717	1.423	1.2935	1.425	2.12	1.72540198482	1.47577664722
1995	1.18	1.71	1.587	1.412	1.504	2.1	1.58823107086	1.33538647827
1996	1.142	1.7	1.579	1.3285	1.602	2.034	1.67514405591	1.42584321902
1997	1.108	1.695	1.524	1.4055	1.487	1.948	1.64960259675	1.40331198762
1998	1.073	1.639	1.449	1.249	1.604	1.94	1.54776151335	1.27662642157
1999	1.041	1.565	1.366	0.8655	1.661	1.932	1.62217404976	1.37650930775
2000	0.989	1.49	1.151	0.79	1.484	1.868	1.72719259024	1.49756732307
2001	0.933	1.418	1.062	0.6175	1.212	1.83	1.65616338747	1.40707647256
2002	0.876	1.341	1.013	0.7765	1.206	1.764	1.56234715517	1.31691201283
2003	0.826	1.31	0.976	0.818	1.197	1.76	1.56814144186	1.32665084047
2004	0.779	1.296	0.995		1.083		1.53356067374	1.26630986347
2005	0.747	1.28	0.898		1.088		1.4843810165	1.22658066834
2006	0.723	1.261	0.864
2007	0.727		0.845
2008	0.852		0.812
2009
2010
2011
2012
