# Supplementary material for: Smaller global and regional carbon emissions from gross land use change when considering sub-grid secondary land cohorts in a global dynamic vegetation model
Source: Copernicus journal article supplement (doi:10.5194/bg-2017-329), 2017-09-04
Supplement: Supplementary file 1 [file bg-2017-329-supplement.zip › data/Fig3def.xls]

## Sheet: Net land use change
	forest (grass)->	crop->	pasture->
1500	0.00359545	0.0012595	0.000208806
1501	0.00359687	0.00125947	0.000208734
1502	0.00359723	0.00125934	0.000208654
1503	0.00359775	0.00125932	0.000208856
1504	0.00359926	0.00125936	0.00020873
1505	0.00360553	0.00125945	0.000208773
1506	0.00360697	0.00125936	0.000208739
1507	0.00360705	0.0012595	0.000208728
1508	0.00360705	0.00125922	0.000208833
1509	0.00360746	0.00125954	0.000208758
1510	0.00360905	0.00125935	0.000208731
1511	0.00360953	0.00125933	0.000208676
1512	0.00361251	0.00126386	0.000208833
1513	0.00362603	0.00126663	0.000208766
1514	0.00363963	0.00126672	0.000208715
1515	0.00364799	0.00126645	0.000208864
1516	0.00365841	0.00126665	0.000208751
1517	0.00365951	0.00126667	0.000208769
1518	0.00366091	0.00126807	0.000208685
1519	0.00366875	0.00126831	0.000208749
1520	0.00367319	0.00126805	0.000208777
1521	0.00368006	0.00126813	0.000208713
1522	0.0036824	0.00126812	0.000208786
1523	0.00368566	0.00126805	0.000208755
1524	0.00368789	0.00126804	0.000208725
1525	0.00368785	0.00126805	0.000208766
1526	0.0036877	0.00126832	0.000208818
1527	0.00368939	0.00126793	0.000208725
1528	0.00368934	0.00126795	0.000208779
1529	0.00369502	0.00126839	0.000208737
1530	0.00370015	0.00126817	0.000208722
1531	0.00370094	0.00126796	0.000208765
1532	0.00370481	0.00126812	0.00020873
1533	0.00370783	0.00126807	0.000208747
1534	0.00372116	0.00126825	0.000208795
1535	0.00378337	0.00126797	0.000208796
1536	0.00383534	0.00126829	0.000208754
1537	0.00383861	0.00126791	0.000208703
1538	0.00384972	0.00126808	0.000208746
1539	0.00385482	0.0012682	0.000208766
1540	0.00386203	0.00126812	0.000208724
1541	0.00386347	0.00126814	0.0002088
1542	0.00386596	0.00126801	0.000208764
1543	0.0038695	0.0012684	0.000208742
1544	0.00388072	0.00126778	0.000208751
1545	0.00389261	0.00126802	0.00020874
1546	0.00390158	0.00126826	0.000208745
1547	0.00390328	0.00126818	0.000208787
1548	0.00390932	0.00126798	0.00020878
1549	0.00391964	0.00126818	0.000208755
1550	0.00393053	0.00126794	0.000208718
1551	0.00393045	0.0012682	0.000208762
1552	0.00393362	0.00126803	0.000208817
1553	0.00393816	0.00126819	0.000208748
1554	0.00393905	0.0012681	0.000208706
1555	0.00394045	0.001268	0.000208701
1556	0.00394338	0.00126808	0.000208865
1557	0.0039557	0.0012681	0.000208681
1558	0.00396154	0.0012683	0.000208854
1559	0.00396254	0.00126803	0.000208732
1560	0.00396498	0.00126822	0.000208731
1561	0.00397377	0.00126798	0.0002088
1562	0.00397749	0.00126817	0.000208769
1563	0.00398759	0.00126819	0.000208738
1564	0.00398955	0.00126793	0.000208681
1565	0.00399442	0.00126826	0.000208805
1566	0.00400037	0.00126793	0.000208786
1567	0.00400757	0.00126825	0.000208714
1568	0.00401584	0.00126802	0.000208806
1569	0.00401802	0.00126799	0.000208708
1570	0.00402232	0.00126828	0.000208798
1571	0.00403199	0.00126802	0.000208752
1572	0.00403707	0.00126804	0.000208748
1573	0.00404049	0.00126827	0.000208709
1574	0.00404523	0.00126801	0.000208795
1575	0.00404983	0.0012681	0.000208776
1576	0.00405196	0.00126817	0.00020874
1577	0.00405392	0.00126805	0.000208775
1578	0.00405539	0.00126815	0.000208699
1579	0.00405893	0.00126804	0.000208765
1580	0.00406867	0.0012682	0.00020879
1581	0.0040744	0.00126785	0.000208774
1582	0.00408004	0.00126825	0.000208747
1583	0.00408435	0.00126805	0.000208766
1584	0.00409037	0.00126816	0.000208702
1585	0.00409862	0.00126799	0.000208766
1586	0.00410253	0.00126826	0.000208793
1587	0.00410791	0.00126815	0.000208755
1588	0.00411027	0.00126802	0.000208755
1589	0.00411166	0.00126808	0.000208763
1590	0.00411712	0.00126814	0.000208754
1591	0.00412337	0.00127165	0.000208772
1592	0.00413096	0.00127391	0.000208774
1593	0.00413816	0.00127377	0.000208797
1594	0.00415119	0.00127397	0.000208714
1595	0.00415947	0.00127376	0.000208747
1596	0.004163	0.00127368	0.000208762
1597	0.00416491	0.0012737	0.000208726
1598	0.00416816	0.00127385	0.000208869
1599	0.00417762	0.00127372	0.00020869
1600	0.0042128	0.000394609	0.000554833
1601	0.00421384	0.000394658	0.000554769
1602	0.00421571	0.000394479	0.000554968
1603	0.0042163	0.000394621	0.000555039
1604	0.0042167	0.000394706	0.000555082
1605	0.00421632	0.000394736	0.000555062
1606	0.0042165	0.000394479	0.000554823
1607	0.00421732	0.000394743	0.000555019
1608	0.00423087	0.000394556	0.000555012
1609	0.00425437	0.000394605	0.000555017
1610	0.00427134	0.000394627	0.000554927
1611	0.00428072	0.000394685	0.000555056
1612	0.00432231	0.000394577	0.000554977
1613	0.00433683	0.000394617	0.000555004
1614	0.00433898	0.000394542	0.000555052
1615	0.00433896	0.000394643	0.000554981
1616	0.00433924	0.000394585	0.000554997
1617	0.00433976	0.000394626	0.00055496
1618	0.0044173	0.000394689	0.000554987
1619	0.00445012	0.000394652	0.000563728
1620	0.00446394	0.000394615	0.000567412
1621	0.00450018	0.000394594	0.000567224
1622	0.00450175	0.000394672	0.000567261
1623	0.00452816	0.0003946	0.000567312
1624	0.00453765	0.000394725	0.000567233
1625	0.00455174	0.000394533	0.000567268
1626	0.0045924	0.000394724	0.000567396
1627	0.00459369	0.000394483	0.000567186
1628	0.0045938	0.000394668	0.000567234
1629	0.00459441	0.000394637	0.00056731
1630	0.00459557	0.000394739	0.00056723
1631	0.00460617	0.000394471	0.000567377
1632	0.00461245	0.000394676	0.000567175
1633	0.00462401	0.000394738	0.000567287
1634	0.00463315	0.000394603	0.000567276
1635	0.00464797	0.000394488	0.000567295
1636	0.00465391	0.000394742	0.000567284
1637	0.0046763	0.000394616	0.000567302
1638	0.0047113	0.000394615	0.000567254
1639	0.00491971	0.000394876	0.000567547
1640	0.00516275	0.000396173	0.000568079
1641	0.00517388	0.000396664	0.00056855
1642	0.00519121	0.000396731	0.000568455
1643	0.00523094	0.000398961	0.000570975
1644	0.00527167	0.000399489	0.00057138
1645	0.0052804	0.000399433	0.00057161
1646	0.00529035	0.000399465	0.000571442
1647	0.00529635	0.000399749	0.000571495
1648	0.00531014	0.00039931	0.000571571
1649	0.0053203	0.000399488	0.000571501
1650	0.0053634	0.000400756	0.000577053
1651	0.00538155	0.000401993	0.000583436
1652	0.00538237	0.000402064	0.00058394
1653	0.00538298	0.000402183	0.00058388
1654	0.00539123	0.000402417	0.000588558
1655	0.00539403	0.000403236	0.000601949
1656	0.00539445	0.000403262	0.000601827
1657	0.00540089	0.000403958	0.000602449
1658	0.00540485	0.000404322	0.000602388
1659	0.00541475	0.000404376	0.000602531
1660	0.00544254	0.000404461	0.000602544
1661	0.00545411	0.00040432	0.000602498
1662	0.00547035	0.000404385	0.000602521
1663	0.00547537	0.000404636	0.000602723
1664	0.00547707	0.000405771	0.000604027
1665	0.00549012	0.000406485	0.000604405
1666	0.00549899	0.000406488	0.000604398
1667	0.00550026	0.000406488	0.000604449
1668	0.00550087	0.000406544	0.00060436
1669	0.0055135	0.000406584	0.000604536
1670	0.00554061	0.000406331	0.00060438
1671	0.00554324	0.000406759	0.000604467
1672	0.00555224	0.000408711	0.000610955
1673	0.00556452	0.000409018	0.000611941
1674	0.0055736	0.000409099	0.000612161
1675	0.00557871	0.000409006	0.000612047
1676	0.0055892	0.000409353	0.000612239
1677	0.0055903	0.000409245	0.000612097
1678	0.00559049	0.000409348	0.000612221
1679	0.00559128	0.000409229	0.000612186
1680	0.00559159	0.000409271	0.00061226
1681	0.00559869	0.000409274	0.000612347
1682	0.00560713	0.000409319	0.000612764
1683	0.00560856	0.000409555	0.000617418
1684	0.00561532	0.000409489	0.000618583
1685	0.00562403	0.000409448	0.000618648
1686	0.00563527	0.000409498	0.000618724
1687	0.00564956	0.000409496	0.000618876
1688	0.0056594	0.000409866	0.000618755
1689	0.0056612	0.000410282	0.000619106
1690	0.00566394	0.000411186	0.000633127
1691	0.00566524	0.00041141	0.000641952
1692	0.00566695	0.000411843	0.000642386
1693	0.00568249	0.000411987	0.000643717
1694	0.00568691	0.000411994	0.0006438
1695	0.00568839	0.000412114	0.000643898
1696	0.00568874	0.000412349	0.00064397
1697	0.00569136	0.000412446	0.00064463
1698	0.00569935	0.000413167	0.000646851
1699	0.00570248	0.000413747	0.000647966
1700	0.0122913	0.00187634	0.0143273
1701	0.0122951	0.00187721	0.01434
1702	0.0123384	0.00187732	0.0143401
1703	0.0124016	0.00187779	0.0143443
1704	0.0124398	0.00187829	0.0143615
1705	0.0125316	0.00187832	0.0143639
1706	0.012572	0.00187849	0.0143637
1707	0.0125887	0.00187845	0.0143639
1708	0.0126863	0.00187854	0.0143751
1709	0.0128057	0.00187858	0.0143934
1710	0.0126214	0.000256	0.00176724
1711	0.0126945	0.000255967	0.00177028
1712	0.0127285	0.000255999	0.00178926
1713	0.012767	0.00025595	0.00179349
1714	0.0128453	0.000255953	0.00181319
1715	0.0129217	0.000256076	0.00183707
1716	0.0129352	0.000255861	0.00186129
1717	0.0129461	0.000256029	0.00190493
1718	0.0129549	0.000255926	0.00191821
1719	0.0130396	0.000256075	0.00196343
1720	0.0118442	0.000256965	0.00243524
1721	0.0119331	0.000257067	0.00244778
1722	0.0120173	0.000257066	0.00251142
1723	0.0120918	0.000257075	0.00251146
1724	0.0121256	0.000257017	0.00251142
1725	0.0121803	0.000256994	0.00251138
1726	0.0122157	0.000257073	0.00251148
1727	0.0122392	0.000257037	0.00251129
1728	0.0122815	0.000257041	0.00251154
1729	0.0123501	0.000257146	0.00251142
1730	0.0136405	0.000255354	0.00292417
1731	0.0137145	0.000255466	0.00292403
1732	0.013772	0.000255366	0.00292427
1733	0.0137995	0.000255403	0.0029241
1734	0.0138726	0.000255392	0.00292412
1735	0.0139435	0.000255398	0.00292421
1736	0.0140238	0.000255463	0.00292416
1737	0.0140723	0.000255331	0.00292412
1738	0.0141006	0.000255473	0.0029242
1739	0.0141564	0.000255403	0.00292417
1740	0.0179931	0.000220308	0.002454
1741	0.0179953	0.000220418	0.00245503
1742	0.0179998	0.000220489	0.00245733
1743	0.0180891	0.000220336	0.00246794
1744	0.018211	0.00022044	0.00251242
1745	0.018248	0.000220365	0.00251234
1746	0.0182779	0.000220543	0.00251287
1747	0.0183736	0.000220679	0.00251349
1748	0.0185196	0.000220723	0.00251332
1749	0.0186248	0.000220698	0.00251334
1750	0.0158964	0.000258339	0.000445057
1751	0.0159298	0.000258219	0.000445038
1752	0.0159766	0.000258362	0.000445041
1753	0.0160054	0.000258317	0.000445213
1754	0.0160326	0.00025827	0.000445053
1755	0.0160504	0.000258265	0.00044509
1756	0.0160898	0.000258294	0.000445027
1757	0.0162174	0.000258292	0.000445085
1758	0.0163103	0.000258311	0.000445095
1759	0.016372	0.000258193	0.000445099
1760	0.0172931	0.000259942	0.000504994
1761	0.017397	0.000259911	0.000504988
1762	0.0174257	0.00025987	0.000505067
1763	0.0174985	0.000259938	0.000504997
1764	0.0175974	0.000259986	0.000504941
1765	0.0176448	0.000259885	0.000504942
1766	0.0176937	0.000259938	0.000505084
1767	0.0177118	0.000259878	0.000504985
1768	0.0177641	0.000259951	0.000504972
1769	0.017795	0.000259843	0.000505047
1770	0.0239565	0.000211744	0.000474504
1771	0.0241136	0.000211691	0.00047465
1772	0.0243771	0.000211746	0.000474722
1773	0.0245474	0.000211742	0.000474561
1774	0.0249376	0.00021176	0.000474597
1775	0.0250321	0.0002117	0.000474585
1776	0.0251955	0.000211701	0.000474551
1777	0.0254917	0.000211681	0.000474745
1778	0.0256652	0.000211799	0.000474537
1779	0.0258002	0.000211717	0.000474698
1780	0.0191464	0.00042022	0.000601372
1781	0.0193224	0.000420181	0.000601238
1782	0.0194066	0.00042021	0.000601269
1783	0.0194495	0.000420184	0.000601355
1784	0.0194998	0.000420177	0.000601348
1785	0.0195736	0.000420244	0.00060128
1786	0.019686	0.000420225	0.000601329
1787	0.0211385	0.000420075	0.00060128
1788	0.0217824	0.000420256	0.000601354
1789	0.0219092	0.000420243	0.000601257
1790	0.014822	0.00140812	0.00342023
1791	0.0148588	0.00140821	0.00342003
1792	0.0148702	0.00140821	0.00342011
1793	0.0149059	0.00140805	0.00342008
1794	0.0150261	0.00140825	0.00342012
1795	0.015126	0.00140824	0.00341998
1796	0.0151817	0.00140815	0.00342017
1797	0.0152004	0.00140819	0.00342003
1798	0.0152166	0.00140815	0.00342064
1799	0.0152638	0.00140826	0.00342825
1800	0.0279908	0.00131176	0.00095646
1801	0.028225	0.00131155	0.000956372
1802	0.0286848	0.00131181	0.000956466
1803	0.0292055	0.00131192	0.000956578
1804	0.0295171	0.00131214	0.000956604
1805	0.0303486	0.00131208	0.000956592
1806	0.0306604	0.00131213	0.000956703
1807	0.0309822	0.00131201	0.000956612
1808	0.0313897	0.00131214	0.000956657
1809	0.0319335	0.0013121	0.00095662
1810	0.0238027	0.000779726	0.000810589
1811	0.0239336	0.000779794	0.000810711
1812	0.0240049	0.000779746	0.000810673
1813	0.0240247	0.000779795	0.000810514
1814	0.0240829	0.000779764	0.000810642
1815	0.0241725	0.000779699	0.000810728
1816	0.0243447	0.000779847	0.000810643
1817	0.0245153	0.000779766	0.000810597
1818	0.0245623	0.000779759	0.000810601
1819	0.0246529	0.000779752	0.000810643
1820	0.0343893	0.000464767	0.00010299
1821	0.0346105	0.000464571	0.00010316
1822	0.0350431	0.000464742	0.000103014
1823	0.0353405	0.00046474	0.000103873
1824	0.0354845	0.000464998	0.000105223
1825	0.0357392	0.000465126	0.00010511
1826	0.036024	0.000465045	0.000105259
1827	0.0361551	0.00046511	0.000105341
1828	0.0363096	0.000465796	0.000106005
1829	0.0363566	0.000468567	0.000107196
1830	0.0438878	0.000276123	0.000869133
1831	0.0442418	0.000276117	0.0008711
1832	0.0444713	0.000276172	0.000872205
1833	0.0447927	0.000276041	0.000872255
1834	0.0449172	0.00027618	0.000872314
1835	0.0451243	0.000276141	0.000872225
1836	0.0455008	0.000276111	0.000872282
1837	0.0459018	0.00027612	0.00087214
1838	0.0461131	0.000276061	0.000872245
1839	0.0463174	0.000276128	0.000872328
1840	0.0367858	0.000758722	0.000529666
1841	0.0371617	0.000758598	0.000529866
1842	0.0374278	0.000758621	0.000529753
1843	0.0374845	0.000758634	0.000529783
1844	0.0375459	0.000758681	0.000529758
1845	0.0376422	0.000758661	0.00052984
1846	0.0377493	0.000758687	0.000529737
1847	0.0379382	0.000758738	0.000529802
1848	0.0380701	0.000758599	0.000529839
1849	0.0382702	0.000758758	0.000529829
1850	0.0407342	0.00147061	0.00385676
1851	0.0408836	0.00147064	0.00386002
1852	0.0411986	0.00147071	0.00386017
1853	0.041536	0.00147079	0.00386622
1854	0.0420468	0.00147162	0.00387709
1855	0.0425271	0.00147173	0.00388182
1856	0.0447131	0.00147237	0.00389594
1857	0.0456675	0.00147655	0.0039269
1858	0.0460839	0.00147647	0.00392679
1859	0.0463427	0.00147658	0.00392839
1860	0.0275821	0.00479175	0.0420278
1861	0.0277992	0.00479272	0.0423454
1862	0.0279306	0.00479336	0.0428253
1863	0.028101	0.00479434	0.0429403
1864	0.0282394	0.0048177	0.0431256
1865	0.0284075	0.00483936	0.0431739
1866	0.0288077	0.00483981	0.0432597
1867	0.0290203	0.00484089	0.043467
1868	0.029151	0.00484374	0.044018
1869	0.0292495	0.00484475	0.0441866
1870	0.0550856	0.000936084	0.00540159
1871	0.0555273	0.000961792	0.00541494
1872	0.056712	0.000980919	0.00541512
1873	0.0576	0.000981186	0.0054174
1874	0.059081	0.00098114	0.00541846
1875	0.0608873	0.000981026	0.0054186
1876	0.0620424	0.000982624	0.00541981
1877	0.0631125	0.000984442	0.00542089
1878	0.0638228	0.000993972	0.0054258
1879	0.0644282	0.000993923	0.00543266
1880	0.0567278	0.00238231	0.00259185
1881	0.0576975	0.00240652	0.00263569
1882	0.058639	0.00242642	0.00267137
1883	0.0591923	0.00242644	0.00267147
1884	0.0598402	0.00242643	0.00267139
1885	0.0605282	0.00242636	0.00267151
1886	0.0618514	0.00243154	0.00267527
1887	0.0633705	0.00244409	0.00268449
1888	0.0640271	0.00244467	0.00268557
1889	0.0646441	0.00244479	0.002686
1890	0.0780818	0.00230755	0.0033531
1891	0.0797882	0.0023167	0.00336166
1892	0.0814822	0.00231681	0.00336167
1893	0.0822951	0.00231669	0.00336162
1894	0.0836671	0.00231679	0.00336169
1895	0.0845615	0.00231682	0.00336204
1896	0.0851972	0.00231698	0.00336191
1897	0.0864669	0.00231716	0.00336195
1898	0.0890658	0.00231883	0.00336197
1899	0.0904713	0.00231917	0.00336246
1900	0.0953672	0.0172657	0.0249172
1901	0.0966859	0.0172657	0.0253478
1902	0.098228	0.0172658	0.0257811
1903	0.0986868	0.0172657	0.0270313
1904	0.0998534	0.0172658	0.0274231
1905	0.101498	0.0172656	0.0275408
1906	0.102346	0.0172668	0.0276802
1907	0.103161	0.0172684	0.027954
1908	0.103929	0.0172699	0.0291941
1909	0.105745	0.0172734	0.0316159
1910	0.068492	0.00499263	0.0679186
1911	0.069534	0.00502158	0.0682115
1912	0.0704105	0.00519266	0.0683441
1913	0.0715816	0.00520043	0.0683464
1914	0.0720889	0.00520294	0.0683465
1915	0.0728815	0.00520657	0.0683617
1916	0.0735337	0.00523852	0.0683839
1917	0.0743254	0.00526191	0.0683998
1918	0.0754535	0.00527391	0.0684215
1919	0.0763943	0.00527684	0.0684913
1920	0.0862738	0.00735009	0.00431394
1921	0.0874646	0.00735077	0.00444749
1922	0.0887755	0.00735269	0.00447855
1923	0.0892639	0.00737954	0.00478263
1924	0.08985	0.00743973	0.00522224
1925	0.0901999	0.0075034	0.00572597
1926	0.0907172	0.00752505	0.00590258
1927	0.0915739	0.00752587	0.00590309
1928	0.0926724	0.0075275	0.00590462
1929	0.0934007	0.0075312	0.00591192
1930	0.135722	0.00856829	0.00654157
1931	0.13656	0.00890189	0.00665652
1932	0.138074	0.00892435	0.00669878
1933	0.139842	0.00895829	0.00676923
1934	0.141935	0.00895873	0.00682327
1935	0.145166	0.00917948	0.00683983
1936	0.146791	0.00936567	0.0069177
1937	0.149061	0.00936626	0.00703188
1938	0.151744	0.00936625	0.00705826
1939	0.153506	0.00936626	0.00708941
1940	0.13718	0.0164275	0.136901
1941	0.138724	0.0164616	0.137424
1942	0.141435	0.0165226	0.138168
1943	0.143356	0.0165616	0.140001
1944	0.145777	0.0165658	0.140385
1945	0.148237	0.0165672	0.141129
1946	0.149962	0.0165675	0.141695
1947	0.15187	0.0166466	0.142267
1948	0.15399	0.0166582	0.142606
1949	0.155713	0.0166688	0.143177
1950	0.220666	0.0160968	0.217637
1951	0.228762	0.0181316	0.225983
1952	0.235926	0.0194664	0.228129
1953	0.242371	0.0194666	0.228905
1954	0.24783	0.0194668	0.229145
1955	0.252904	0.0194676	0.230849
1956	0.256609	0.0194686	0.234555
1957	0.259946	0.0194691	0.239207
1958	0.264359	0.019475	0.241659
1959	0.269653	0.0194799	0.243402
1960	0.0655454	0.0144604	0.0333306
1961	0.0661461	0.0144623	0.0335125
1962	0.0670449	0.0145388	0.0336447
1963	0.0674894	0.0146829	0.0341171
1964	0.068045	0.0146851	0.0342947
1965	0.0684373	0.0147475	0.0345367
1966	0.0685364	0.0147922	0.0347422
1967	0.0687758	0.0148662	0.0351706
1968	0.069044	0.0148938	0.0353461
1969	0.069272	0.0149524	0.0357302
1970	0.0624384	0.0100837	0.0150073
1971	0.0635566	0.0100862	0.0151818
1972	0.0646091	0.0100936	0.0154738
1973	0.0648593	0.0100945	0.0154744
1974	0.0652659	0.0101238	0.0156545
1975	0.0659216	0.0101383	0.0164842
1976	0.0665434	0.0101461	0.017004
1977	0.0677963	0.0101531	0.0176086
1978	0.0683145	0.0101641	0.0185275
1979	0.0686788	0.010172	0.0196045
1980	0.0866824	0.0133119	0.0235788
1981	0.0881841	0.0133419	0.0236253
1982	0.0890216	0.0133462	0.0236639
1983	0.0902923	0.0133471	0.0237016
1984	0.0910715	0.0133475	0.0237052
1985	0.0917034	0.0133482	0.0238585
1986	0.0922426	0.0133518	0.0240057
1987	0.092641	0.013352	0.0240058
1988	0.0947635	0.0133527	0.0240684
1989	0.0990295	0.0133545	0.024148
1990	0.0496493	0.0287372	0.0397665
1991	0.0500841	0.0289205	0.0409114
1992	0.0507297	0.0289668	0.0412288
1993	0.0514547	0.0289765	0.0416616
1994	0.052035	0.0289848	0.0426497
1995	0.0526799	0.0290069	0.0432692
1996	0.0532115	0.0290136	0.0437138
1997	0.0543523	0.0290139	0.0438268
1998	0.0553344	0.0290288	0.0442047
1999	0.0564871	0.0290626	0.0464346
2000	0.0764433	0.126371	0.0663373
2001	0.052757	0.100704	0.0731214
2002	0.0862914	0.0540956	0.101698
2003	0.104198	0.0778973	0.0179921
2004	0.0866481	0.059512	0.0917242

## Sheet: Land turnover
	forest<->pasture	forest<->crop	grass<->pasture	grass<->crop
1500	0	0	0	0
1501	0.00039528	0.000819814	0.000107367	0.000726042
1502	0.00039614	0.000822901	0.000107622	0.000729004
1503	0.000396987	0.000825967	0.00010787	0.000731952
1504	0.000397841	0.000829022	0.000108118	0.000734898
1505	0.000398689	0.000832109	0.000108371	0.000737844
1506	0.000399526	0.000836016	0.000108619	0.000741645
1507	0.000402398	0.000857876	0.00011186	0.000772548
1508	0.000406561	0.000891445	0.000117079	0.000821082
1509	0.000407417	0.000894473	0.000117342	0.000823955
1510	0.000476767	0.000899409	0.000181359	0.000827969
1511	0.000931782	0.000913384	0.000641084	0.000838096
1512	0.00111486	0.000917875	0.000841128	0.000842032
1513	0.00134662	0.000925699	0.00105411	0.000846998
1514	0.00140045	0.00106983	0.00109204	0.000910993
1515	0.00151447	0.00113377	0.00117708	0.000950898
1516	0.00168244	0.0012932	0.00135657	0.00107694
1517	0.00181867	0.00133577	0.0015214	0.00110604
1518	0.0021461	0.00138705	0.00187111	0.00116019
1519	0.00267542	0.00142665	0.00248229	0.00118659
1520	0.00299215	0.0014899	0.00283135	0.00122105
1521	0.00338751	0.0016202	0.00322347	0.00130844
1522	0.00372642	0.00172826	0.00347338	0.00136348
1523	0.00426992	0.00181306	0.00396731	0.00142773
1524	0.00492387	0.00192691	0.00452588	0.00152757
1525	0.00562111	0.00214272	0.00507739	0.00166505
1526	0.00647818	0.00230419	0.00564529	0.0018174
1527	0.00729907	0.00239052	0.00623327	0.00190681
1528	0.00806343	0.00246376	0.00665061	0.00197325
1529	0.00912478	0.00252078	0.00731082	0.00201093
1530	0.00968968	0.0025918	0.00762544	0.00206466
1531	0.0103067	0.0027186	0.00808048	0.00212922
1532	0.0110223	0.00280398	0.00860541	0.00218186
1533	0.0116716	0.00288187	0.00907029	0.00224245
1534	0.0121487	0.00297784	0.00950299	0.0023185
1535	0.0125438	0.0030919	0.00983257	0.00239815
1536	0.0130156	0.00313513	0.0102702	0.0024291
1537	0.0133518	0.00320322	0.0105865	0.0024716
1538	0.0137044	0.00335118	0.0109112	0.00255363
1539	0.0142	0.00342436	0.0113375	0.00260263
1540	0.0148437	0.00350751	0.0119318	0.00267074
1541	0.0153508	0.00358393	0.0124105	0.00272755
1542	0.0158816	0.00368761	0.0129343	0.0028105
1543	0.0163746	0.00382297	0.0134973	0.00293945
1544	0.0168723	0.0039361	0.0139453	0.00304277
1545	0.0173164	0.00403453	0.0143113	0.00311396
1546	0.0177896	0.00419258	0.0147597	0.00324835
1547	0.0183066	0.0042962	0.0152052	0.00332851
1548	0.0188054	0.00439576	0.0157415	0.00340164
1549	0.0192566	0.00453062	0.016186	0.0034968
1550	0.0195381	0.0046117	0.0164354	0.00355508
1551	0.0199854	0.00475452	0.0168264	0.00364603
1552	0.0204563	0.00485343	0.0172857	0.00371905
1553	0.0209187	0.00494066	0.0176895	0.00379358
1554	0.0213289	0.00503398	0.0180528	0.00385758
1555	0.021787	0.00511531	0.0184394	0.00392044
1556	0.0221379	0.0051758	0.0187986	0.00397639
1557	0.0225386	0.00529775	0.0191633	0.00406619
1558	0.0227742	0.00536511	0.0193781	0.00412247
1559	0.0230299	0.00543559	0.0196056	0.00418207
1560	0.0233608	0.00551877	0.0199121	0.00424803
1561	0.0236569	0.00561612	0.0201605	0.00431373
1562	0.02412	0.00572916	0.020524	0.0043993
1563	0.0244697	0.00577525	0.0208099	0.00443562
1564	0.0248823	0.00584183	0.0211797	0.00448659
1565	0.0252287	0.00592793	0.0215293	0.00456952
1566	0.0256316	0.00602852	0.0219163	0.00464323
1567	0.0260378	0.00612731	0.0222698	0.00471975
1568	0.0264163	0.00620271	0.0225769	0.00478252
1569	0.0267721	0.00627916	0.0228586	0.0048388
1570	0.0270249	0.00632423	0.0231067	0.00488133
1571	0.0273598	0.00638862	0.0234127	0.00494222
1572	0.0277004	0.00644347	0.0237033	0.00498685
1573	0.0279737	0.00649749	0.0238983	0.00502329
1574	0.0281843	0.00654474	0.0240952	0.00506041
1575	0.0284493	0.00660813	0.0243146	0.00511339
1576	0.0286678	0.00664628	0.0245002	0.00515154
1577	0.028884	0.00668598	0.0246923	0.00519179
1578	0.0291843	0.00674084	0.024906	0.0052314
1579	0.0294021	0.006789	0.02511	0.00527484
1580	0.0296479	0.00682238	0.0252847	0.00531144
1581	0.0299225	0.00686921	0.0254605	0.00533374
1582	0.0303234	0.00695378	0.0257	0.00537895
1583	0.0306669	0.00699863	0.0259599	0.00541562
1584	0.0308837	0.00703382	0.0260923	0.00544087
1585	0.0311093	0.00706823	0.0262609	0.00546523
1586	0.0313415	0.00710628	0.0264829	0.00550103
1587	0.0315212	0.00714913	0.0266539	0.00555171
1588	0.0318152	0.00720254	0.0268633	0.00559712
1589	0.0320835	0.0072501	0.0270332	0.00562964
1590	0.0322273	0.00728301	0.0271506	0.00566326
1591	0.0324081	0.0073246	0.0273121	0.00570594
1592	0.0326081	0.00736128	0.027484	0.00573734
1593	0.0327954	0.00742965	0.0276088	0.00577838
1594	0.0330046	0.00749695	0.0277533	0.00582964
1595	0.0332236	0.00754876	0.0278989	0.00586822
1596	0.0334824	0.00759023	0.0280661	0.00589868
1597	0.0337333	0.00762989	0.0282233	0.00593148
1598	0.0339332	0.0076777	0.0283623	0.0059631
1599	0.0341834	0.00770701	0.0285409	0.00599818
1600	0.0343264	0.00773121	0.0286387	0.00601935
1601	0.0345566	0.00777651	0.0287623	0.00605209
1602	0.0346915	0.00781775	0.0288522	0.00608301
1603	0.034832	0.0078499	0.0289555	0.00610913
1604	0.0350238	0.00788787	0.0290848	0.00614096
1605	0.0351905	0.00793241	0.0292145	0.00618798
1606	0.0353797	0.00796984	0.0293361	0.00622232
1607	0.0355441	0.00799859	0.0294291	0.0062448
1608	0.0356776	0.00803127	0.0295287	0.00627314
1609	0.0357702	0.00808185	0.0295979	0.00630906
1610	0.0358898	0.00812147	0.0296981	0.00633758
1611	0.0359787	0.00816484	0.0297743	0.00636809
1612	0.0360877	0.00820439	0.0298435	0.00639331
1613	0.0362093	0.00825351	0.0299493	0.00642858
1614	0.0362918	0.00829303	0.0300181	0.00645394
1615	0.0363726	0.00835505	0.0300812	0.00649525
1616	0.0364348	0.00839849	0.0301449	0.00652603
1617	0.0365192	0.00843843	0.0302125	0.0065528
1618	0.0366138	0.00848217	0.0302839	0.00657918
1619	0.0367029	0.00854474	0.0303481	0.00661419
1620	0.0368086	0.00859867	0.0304196	0.00665069
1621	0.036915	0.00866285	0.0305117	0.00669556
1622	0.0370237	0.00871853	0.0306098	0.00674543
1623	0.0371815	0.00876822	0.0307084	0.00678185
1624	0.0372589	0.00880631	0.0307632	0.00680652
1625	0.037334	0.00885341	0.0308093	0.00683435
1626	0.0374473	0.00890327	0.0309	0.00686744
1627	0.0375468	0.00894937	0.0309631	0.00689671
1628	0.037627	0.00899832	0.0310096	0.00692175
1629	0.0377126	0.00904347	0.0310793	0.00694868
1630	0.0378166	0.00908422	0.0311652	0.00697355
1631	0.0379486	0.00913151	0.0312538	0.00700459
1632	0.0380688	0.00917727	0.0313339	0.00703376
1633	0.0381474	0.0092155	0.0313889	0.00705786
1634	0.0382024	0.00924988	0.0314309	0.00707964
1635	0.0382741	0.00928638	0.0314781	0.00710099
1636	0.0383887	0.00934123	0.0315614	0.00713072
1637	0.0384685	0.00938777	0.031614	0.00715762
1638	0.0386034	0.00943352	0.0316932	0.00718901
1639	0.0386984	0.00947418	0.0317504	0.00721859
1640	0.0388533	0.00952195	0.0318314	0.00725084
1641	0.0389739	0.00956723	0.0319116	0.00728446
1642	0.0391039	0.00961233	0.0319949	0.00731465
1643	0.0392257	0.00966226	0.0320788	0.00734849
1644	0.0394102	0.00970817	0.0321875	0.00738164
1645	0.0396276	0.00975119	0.0323072	0.00741155
1646	0.0399551	0.00978632	0.032476	0.0074372
1647	0.0402848	0.00982746	0.0326619	0.00746748
1648	0.0406875	0.00987207	0.0328467	0.00749989
1649	0.0409674	0.00990677	0.0329847	0.00752641
1650	0.0412142	0.0099507	0.0330873	0.00756056
1651	0.0414914	0.00998988	0.033224	0.00758704
1652	0.0417313	0.0100375	0.033362	0.00761886
1653	0.041987	0.010072	0.0335066	0.00764061
1654	0.0422521	0.0101108	0.03367	0.00767164
1655	0.0424653	0.0101449	0.0338021	0.00769711
1656	0.0426601	0.010182	0.0338926	0.00771951
1657	0.042925	0.0102299	0.0340329	0.00774538
1658	0.0431494	0.0102797	0.0341317	0.00777001
1659	0.0433391	0.0103184	0.0342306	0.00779301
1660	0.0435354	0.0103518	0.0343335	0.00781615
1661	0.0437232	0.0103866	0.0344353	0.00783791
1662	0.0439024	0.0104123	0.0345269	0.00785458
1663	0.0441731	0.0104616	0.0346709	0.00789226
1664	0.0444556	0.0105091	0.0348192	0.00792611
1665	0.0447122	0.0105474	0.0349398	0.00795593
1666	0.0449664	0.01058	0.0350657	0.0079768
1667	0.0451777	0.0106115	0.035183	0.00799735
1668	0.0453511	0.010638	0.035276	0.00801684
1669	0.0455459	0.0106693	0.0353706	0.00803709
1670	0.0458451	0.0107165	0.0354925	0.00806288
1671	0.0460638	0.0107578	0.0355977	0.00808638
1672	0.0463415	0.0108014	0.0357267	0.00811592
1673	0.0465654	0.0108464	0.0358351	0.00814074
1674	0.046798	0.0108927	0.0359516	0.00816866
1675	0.0469891	0.0109307	0.0360419	0.0081894
1676	0.0472557	0.0109691	0.0361499	0.00821054
1677	0.0474789	0.0110195	0.0362436	0.00823692
1678	0.0477901	0.0110755	0.0363646	0.00826406
1679	0.0480282	0.0111262	0.0364698	0.00829371
1680	0.048247	0.0111809	0.0365613	0.00832106
1681	0.0484724	0.0112468	0.0366728	0.00835176
1682	0.0487537	0.0112984	0.0367989	0.0083776
1683	0.0490462	0.0113567	0.0369274	0.00840917
1684	0.0493122	0.0114108	0.0370409	0.00843633
1685	0.0495564	0.0114584	0.0371673	0.00846205
1686	0.0498151	0.0114955	0.0372767	0.0084827
1687	0.0500188	0.0115265	0.0373737	0.00850057
1688	0.0502209	0.011563	0.0374758	0.00852144
1689	0.0504433	0.0115937	0.0375812	0.00854006
1690	0.0507007	0.011633	0.0377003	0.00856472
1691	0.0509881	0.0116716	0.0378307	0.00858872
1692	0.0512231	0.011705	0.0379311	0.00860885
1693	0.0514845	0.0117367	0.0380489	0.00862819
1694	0.0517629	0.011772	0.038165	0.00864809
1695	0.0519898	0.0118099	0.0382763	0.00867036
1696	0.0522259	0.011863	0.0384064	0.00869976
1697	0.05249	0.0118978	0.0385423	0.00872093
1698	0.052713	0.0119387	0.0386521	0.00874288
1699	0.0528376	0.0119634	0.0387195	0.00875345
1700	0.0527417	0.0119679	0.0387248	0.00876424
1701	0.052451	0.011986	0.0387171	0.00877916
1702	0.0521908	0.0120074	0.0387233	0.00880262
1703	0.0519289	0.0120232	0.0387205	0.00882072
1704	0.0516956	0.0120368	0.0387327	0.00883383
1705	0.051429	0.0120451	0.0387161	0.00884521
1706	0.0511385	0.0120529	0.0386834	0.00885846
1707	0.0508785	0.0120663	0.038651	0.00887015
1708	0.0505983	0.0120779	0.0386071	0.00888045
1709	0.0471945	0.012018	0.0373269	0.0088713
1710	0.0473189	0.0120656	0.037438	0.00889726
1711	0.0473961	0.0121144	0.0374735	0.00891867
1712	0.0474879	0.0121625	0.0375132	0.00894075
1713	0.0475701	0.0122103	0.0375517	0.0089634
1714	0.0476748	0.0122674	0.0376	0.00899028
1715	0.0477858	0.0123173	0.0376486	0.00901484
1716	0.0478946	0.0123687	0.0377024	0.00903909
1717	0.0479744	0.0124168	0.0377483	0.00906591
1718	0.0480473	0.0124606	0.037781	0.00908794
1719	0.0481308	0.0124793	0.037818	0.00910033
1720	0.0482594	0.0125089	0.0378879	0.00912444
1721	0.0483814	0.0125325	0.0379516	0.00914111
1722	0.0484804	0.0125619	0.0380049	0.00915999
1723	0.0485871	0.0126168	0.0380605	0.0091875
1724	0.048725	0.0126749	0.0381382	0.00921747
1725	0.0488074	0.0127284	0.0381808	0.00924342
1726	0.0489032	0.0128276	0.0382291	0.00928514
1727	0.0490436	0.0129445	0.0382945	0.00933252
1728	0.049176	0.0130731	0.0383624	0.00938432
1729	0.0492892	0.0131785	0.0384122	0.00942377
1730	0.0495149	0.0132902	0.0385168	0.00946407
1731	0.0496977	0.0133913	0.0386187	0.00950155
1732	0.0499056	0.0135055	0.0387229	0.00954087
1733	0.0501374	0.0136205	0.0388326	0.00958046
1734	0.0504239	0.0137408	0.0389659	0.00962472
1735	0.0506321	0.0138542	0.0390723	0.0096687
1736	0.0508217	0.0139195	0.0391561	0.00969757
1737	0.0509901	0.0139656	0.0392176	0.00971684
1738	0.0511807	0.0140108	0.039294	0.00973422
1739	0.0513806	0.014057	0.0393804	0.00975516
1740	0.0515608	0.0141097	0.0394597	0.00978556
1741	0.0516697	0.0141629	0.039513	0.00981656
1742	0.0517774	0.014222	0.0395765	0.00984864
1743	0.0519042	0.0142735	0.0396537	0.00987726
1744	0.05203	0.0143293	0.0397205	0.00991008
1745	0.0521814	0.0143925	0.0398051	0.00994618
1746	0.0523036	0.0144403	0.0398614	0.00997143
1747	0.0524256	0.014484	0.039931	0.00999661
1748	0.0525578	0.0145299	0.0399975	0.0100218
1749	0.0527258	0.0145746	0.040072	0.0100437
1750	0.0529398	0.0146145	0.0401776	0.0100658
1751	0.0531793	0.0146677	0.0402853	0.0100971
1752	0.0534095	0.0147189	0.0403868	0.0101245
1753	0.0535982	0.014758	0.0404717	0.010146
1754	0.0538082	0.0148304	0.0405595	0.0101752
1755	0.054017	0.0149076	0.0406441	0.0102059
1756	0.0542453	0.0149871	0.0407421	0.0102405
1757	0.0544825	0.0150555	0.0408499	0.0102716
1758	0.0546448	0.015103	0.0409147	0.010296
1759	0.0548413	0.0151539	0.0409999	0.0103262
1760	0.054994	0.0151986	0.041068	0.010349
1761	0.0551314	0.015245	0.0411254	0.0103728
1762	0.0552822	0.0152858	0.0411853	0.0103942
1763	0.0554896	0.0153356	0.0412751	0.0104206
1764	0.0557099	0.0154144	0.0413721	0.0104571
1765	0.0559884	0.0154811	0.0415182	0.0104873
1766	0.0563272	0.0155424	0.0416859	0.0105161
1767	0.0566943	0.015607	0.0418761	0.0105465
1768	0.0570316	0.0156732	0.042067	0.0105786
1769	0.0573339	0.0157385	0.0422291	0.0106089
1770	0.0576552	0.0158085	0.0423984	0.0106411
1771	0.0580398	0.0158876	0.0425832	0.0106728
1772	0.058465	0.0159665	0.042802	0.0107095
1773	0.0588153	0.0160515	0.042962	0.0107434
1774	0.0591335	0.0161437	0.0431042	0.0107759
1775	0.0594295	0.0162382	0.0432427	0.0108126
1776	0.059688	0.0163358	0.0433614	0.0108477
1777	0.0599259	0.0164397	0.0434672	0.0108824
1778	0.0601782	0.016548	0.0435879	0.0109187
1779	0.0602062	0.0166385	0.0435939	0.0109524
1780	0.0605822	0.0167371	0.043754	0.0109906
1781	0.0607718	0.0168592	0.0438409	0.0110339
1782	0.0609894	0.0169818	0.0439393	0.0110762
1783	0.0611867	0.0170892	0.0440209	0.0111121
1784	0.0613944	0.0171619	0.0440997	0.0111432
1785	0.0616224	0.0172387	0.0441874	0.0111792
1786	0.0618347	0.0173096	0.0442674	0.0112114
1787	0.0620344	0.0173714	0.0443444	0.0112385
1788	0.0623667	0.0174346	0.044437	0.0112672
1789	0.06282	0.017506	0.0445686	0.0112968
1790	0.0631872	0.0175858	0.0446764	0.011328
1791	0.0633915	0.017654	0.0447717	0.0113611
1792	0.0636102	0.017713	0.0448746	0.0113912
1793	0.0638201	0.0177697	0.0449636	0.0114211
1794	0.0640137	0.0178442	0.0450676	0.0114522
1795	0.0642397	0.0179098	0.0451738	0.0114851
1796	0.0645005	0.0179791	0.0452923	0.0115183
1797	0.0647553	0.0180485	0.0454044	0.0115541
1798	0.0649405	0.0181442	0.0454932	0.011606
1799	0.0651267	0.0182266	0.0455812	0.0116503
1800	0.0654267	0.0182603	0.0456982	0.0116789
1801	0.0657265	0.0183114	0.0458051	0.0117078
1802	0.065977	0.0183528	0.0458998	0.0117356
1803	0.0662834	0.0183806	0.0460101	0.0117632
1804	0.0665815	0.0184074	0.0461141	0.0117876
1805	0.0668868	0.0184432	0.0462286	0.0118155
1806	0.0671926	0.0184684	0.0463299	0.0118395
1807	0.0675303	0.0184455	0.0464421	0.011857
1808	0.067911	0.0183506	0.0465841	0.0118648
1809	0.0682988	0.0182424	0.0467118	0.0118686
1810	0.068814	0.0182808	0.0468871	0.0118964
1811	0.0693072	0.018346	0.0470534	0.0119295
1812	0.0698501	0.0184108	0.0472278	0.0119616
1813	0.0704058	0.0184841	0.0474093	0.0119965
1814	0.0709375	0.0185508	0.0475972	0.0120292
1815	0.0714519	0.0186496	0.0477757	0.0120663
1816	0.0720076	0.0187464	0.0479697	0.0121029
1817	0.07257	0.0188182	0.0481599	0.012135
1818	0.0731311	0.0188373	0.0483514	0.0121586
1819	0.0736806	0.0188403	0.0485435	0.0121809
1820	0.0741489	0.0189117	0.0487101	0.012216
1821	0.0748739	0.0190086	0.0489861	0.0122802
1822	0.0755647	0.0191142	0.0492223	0.0123483
1823	0.0767519	0.0192029	0.0495492	0.0124046
1824	0.0779403	0.0192937	0.0498684	0.0124579
1825	0.0787878	0.0193801	0.0500983	0.0125087
1826	0.0796028	0.0194688	0.0503241	0.0125612
1827	0.0802927	0.0195707	0.0505524	0.0126196
1828	0.0808465	0.0196603	0.050764	0.0126727
1829	0.0812965	0.0197456	0.0509345	0.0127238
1830	0.0818216	0.0198403	0.0511504	0.0127789
1831	0.0820758	0.01993	0.0512885	0.0128335
1832	0.0823447	0.0200202	0.0514283	0.0128975
1833	0.0826482	0.0201047	0.0516293	0.0129522
1834	0.0829803	0.0201931	0.0518964	0.0130095
1835	0.0832521	0.0202779	0.0521314	0.0130653
1836	0.0834899	0.02037	0.0522737	0.0131259
1837	0.0837453	0.020467	0.0524135	0.0131838
1838	0.083999	0.0205686	0.0525572	0.0132441
1839	0.0842493	0.0206635	0.0527053	0.0133054
1840	0.0845343	0.0207606	0.052858	0.0133587
1841	0.0848585	0.0208694	0.0530431	0.0134246
1842	0.0851868	0.0209784	0.0532636	0.0134876
1843	0.0855034	0.0210781	0.0534641	0.0135497
1844	0.085822	0.0211772	0.0536612	0.0136131
1845	0.0861454	0.0212763	0.0538571	0.0136734
1846	0.0864527	0.0213708	0.0540566	0.0137343
1847	0.0867781	0.02147	0.0542573	0.0137969
1848	0.087093	0.0215724	0.054452	0.013863
1849	0.0873493	0.0216719	0.0545998	0.0139242
1850	0.0876344	0.0217783	0.0547443	0.0139824
1851	0.0879527	0.0218615	0.0549001	0.0140414
1852	0.0882885	0.0219573	0.0550737	0.0141015
1853	0.0886231	0.0220554	0.0552357	0.0141614
1854	0.0889723	0.0221438	0.0553986	0.0142173
1855	0.0893634	0.022248	0.055572	0.014284
1856	0.0897189	0.0223479	0.05573	0.0143476
1857	0.090084	0.022451	0.0559013	0.0144126
1858	0.0904849	0.0225527	0.0560716	0.014475
1859	0.0909079	0.0226353	0.0562397	0.0145301
1860	0.0911582	0.022707	0.0563933	0.0145843
1861	0.0913218	0.0227864	0.0565395	0.0146435
1862	0.0915094	0.0228596	0.0566896	0.0147022
1863	0.0917404	0.0229332	0.0568586	0.0147608
1864	0.0919397	0.0230125	0.0570106	0.0148235
1865	0.0920943	0.0231029	0.0571653	0.0148973
1866	0.0922036	0.0232155	0.057308	0.0149764
1867	0.0921881	0.0233319	0.0574516	0.0150564
1868	0.0920779	0.0234243	0.0575847	0.0151234
1869	0.091162	0.0235214	0.0575652	0.0151886
1870	0.0921893	0.0236641	0.057883	0.0152722
1871	0.0925306	0.0238092	0.0580684	0.0153531
1872	0.0928757	0.0239279	0.0582554	0.0154246
1873	0.0932156	0.0240309	0.058441	0.0154941
1874	0.0935133	0.0241413	0.058608	0.0155663
1875	0.0937392	0.0242471	0.0587494	0.0156361
1876	0.093831	0.0243543	0.0588582	0.0157066
1877	0.0936989	0.0244612	0.0589059	0.0157787
1878	0.0931256	0.024558	0.0588553	0.0158466
1879	0.0910562	0.0246396	0.0585051	0.0159161
1880	0.0925748	0.0247582	0.0588512	0.0159833
1881	0.0929312	0.0248944	0.0589704	0.0160683
1882	0.0933811	0.0250401	0.0591148	0.0161575
1883	0.0938662	0.025221	0.059254	0.0162609
1884	0.0943078	0.0253743	0.0593849	0.0163503
1885	0.0947395	0.0255352	0.0595123	0.0164391
1886	0.095345	0.0256894	0.0596492	0.0165278
1887	0.0965059	0.0258488	0.059917	0.0166221
1888	0.0981498	0.0260291	0.0602171	0.0167206
1889	0.0994689	0.0262404	0.0605479	0.0168206
1890	0.0999891	0.0264554	0.0606828	0.0169263
1891	0.100219	0.0265997	0.0607602	0.0170201
1892	0.100436	0.0267363	0.0608206	0.0171098
1893	0.100654	0.0268689	0.0608645	0.0171983
1894	0.100658	0.0270048	0.0608696	0.0172887
1895	0.10059	0.0271371	0.0608769	0.0173789
1896	0.100474	0.0272584	0.0608527	0.0174649
1897	0.100229	0.02738	0.0607984	0.0175544
1898	0.099727	0.027574	0.0607083	0.017673
1899	0.0987651	0.0277827	0.0605332	0.0177972
1900	0.0989125	0.0279737	0.0605515	0.0179001
1901	0.0990339	0.0281743	0.0608349	0.0180354
1902	0.0992284	0.0283996	0.0611553	0.0181871
1903	0.0994363	0.0286055	0.061451	0.0183344
1904	0.0996948	0.028818	0.0617361	0.0184795
1905	0.0999763	0.0290263	0.062027	0.0186212
1906	0.100216	0.0292394	0.0623185	0.0187681
1907	0.100152	0.0294568	0.0625552	0.0189255
1908	0.0999086	0.0296978	0.0627413	0.0190912
1909	0.0997201	0.0299091	0.0629629	0.0192459
1910	0.100589	0.0301626	0.0634045	0.0194006
1911	0.101479	0.0304304	0.0636917	0.0195503
1912	0.102491	0.0306744	0.0640349	0.0196892
1913	0.103713	0.030935	0.0644656	0.0198333
1914	0.10521	0.0312436	0.0649242	0.0199909
1915	0.106518	0.0314952	0.0652938	0.0201337
1916	0.107479	0.0317311	0.0655613	0.0202627
1917	0.108405	0.03199	0.065817	0.0204
1918	0.109259	0.0323035	0.0660732	0.0205567
1919	0.110851	0.0326692	0.066461	0.0207196
1920	0.112706	0.0329948	0.0668755	0.0208626
1921	0.113961	0.0332959	0.0673385	0.0210333
1922	0.115145	0.033585	0.0677897	0.0212116
1923	0.116335	0.0338658	0.0682315	0.0213872
1924	0.117553	0.0341761	0.0686582	0.0215729
1925	0.11872	0.0344811	0.0690578	0.0217598
1926	0.119741	0.0347888	0.0694279	0.0219454
1927	0.120851	0.035096	0.0698404	0.0221405
1928	0.122057	0.0354078	0.0703195	0.0223368
1929	0.123427	0.0357206	0.0708703	0.0225236
1930	0.124808	0.0360066	0.0713164	0.0227017
1931	0.12733	0.0366969	0.072248	0.0230559
1932	0.129663	0.0373045	0.0730816	0.0233649
1933	0.132233	0.037937	0.0741489	0.0237265
1934	0.134652	0.0385094	0.0749304	0.0240425
1935	0.137268	0.039048	0.0757929	0.0243351
1936	0.139803	0.0396242	0.0765875	0.0246269
1937	0.142479	0.0403642	0.0774062	0.0249877
1938	0.145274	0.0410907	0.0781567	0.0253581
1939	0.14732	0.041693	0.0787387	0.0256586
1940	0.149975	0.0423835	0.0792285	0.0259641
1941	0.153655	0.0435325	0.0808251	0.0266064
1942	0.156799	0.0445458	0.0822302	0.0271715
1943	0.160041	0.045486	0.0836234	0.0277093
1944	0.163833	0.0464632	0.0850959	0.0282489
1945	0.167632	0.0474106	0.0865163	0.0287986
1946	0.171496	0.0485164	0.0878401	0.0293242
1947	0.174816	0.0495909	0.0889514	0.0298444
1948	0.178055	0.050606	0.0901142	0.0303465
1949	0.176494	0.0516014	0.0907937	0.030831
1950	0.185167	0.0527544	0.0916776	0.0312395
1951	0.191683	0.0543008	0.0931126	0.0320005
1952	0.198827	0.0559488	0.0941196	0.0327641
1953	0.206475	0.0574972	0.0951016	0.0334935
1954	0.21352	0.0591012	0.0958073	0.0341722
1955	0.220614	0.0608298	0.0962163	0.035007
1956	0.226654	0.0624842	0.096093	0.0357125
1957	0.231823	0.0641397	0.0954158	0.036329
1958	0.236276	0.0656313	0.0942442	0.0367802
1959	0.239841	0.0670058	0.0921708	0.0369464
1960	0.24466	0.0688017	0.0935915	0.0379269
1961	0.245174	0.069389	0.0936211	0.0383093
1962	0.24564	0.0701555	0.0936255	0.0387368
1963	0.24605	0.0709695	0.0936083	0.0391424
1964	0.246537	0.0716434	0.0935851	0.0395713
1965	0.247041	0.0723346	0.0936421	0.0399569
1966	0.247564	0.0728422	0.0936561	0.040294
1967	0.248011	0.0733509	0.0936209	0.0406328
1968	0.248502	0.0739679	0.093558	0.0410481
1969	0.244357	0.0744647	0.0930144	0.0413603
1970	0.249791	0.0751384	0.0935562	0.041724
1971	0.250631	0.0757049	0.0935438	0.0419593
1972	0.251412	0.0762583	0.0935074	0.0421865
1973	0.252408	0.076818	0.0935134	0.0424071
1974	0.253353	0.0773946	0.0935172	0.0426393
1975	0.254355	0.0780072	0.093506	0.0428891
1976	0.255519	0.078586	0.0935245	0.0431388
1977	0.256818	0.079156	0.0935736	0.0433872
1978	0.25793	0.0797343	0.0935912	0.0436334
1979	0.256594	0.08026	0.0933987	0.0438276
1980	0.259629	0.0808317	0.0931642	0.0438653
1981	0.261286	0.0813965	0.0928747	0.0439133
1982	0.262957	0.0820058	0.0925454	0.043928
1983	0.264441	0.0825813	0.0921179	0.0439056
1984	0.266012	0.0830769	0.091669	0.0438501
1985	0.267754	0.0835812	0.0912443	0.0437928
1986	0.269637	0.0840622	0.0908425	0.0437082
1987	0.271548	0.0845492	0.0903943	0.0436149
1988	0.27353	0.0850626	0.0898046	0.0435062
1989	0.268716	0.0855944	0.0891507	0.043386
1990	0.276636	0.0864101	0.0887519	0.0435901
1991	0.2779	0.0880386	0.0888541	0.0443891
1992	0.278984	0.0894029	0.0889689	0.0451722
1993	0.280398	0.0907655	0.0893484	0.0459214
1994	0.28166	0.0920414	0.0896732	0.0465694
1995	0.283168	0.0931824	0.0900003	0.0471512
1996	0.283618	0.0940711	0.0898099	0.0475544
1997	0.283232	0.0946713	0.0889738	0.0477295
1998	0.282838	0.0952781	0.0879373	0.0478478
1999	0.277253	0.0956305	0.0866528	0.0479061
2000	0.279329	0.0951422	0.0851734	0.0478405
2001	0.277014	0.0955235	0.0854951	0.0481615
2002	0.27581	0.0971793	0.0835538	0.0485676
2003	0.272372	0.100143	0.0828501	0.0490009
2004	0.246011	0.100398	0.0788526	0.047864

## Sheet: Wood harvest
	Primary	Secondary
1500	0.00733865	0
1501	0.00737994	0
1502	0.00738607	5.89262e-08
1503	0.00739075	1.35553e-07
1504	0.00739576	2.26011e-07
1505	0.00740051	6.40514e-07
1506	0.00740491	1.16149e-06
1507	0.00740936	1.56873e-06
1508	0.00741363	1.91046e-06
1509	0.00741782	2.22651e-06
1510	0.00742224	2.63442e-06
1511	0.0074263	3.10792e-06
1512	0.00743074	3.80321e-06
1513	0.0074348	4.45716e-06
1514	0.00743899	5.70653e-06
1515	0.00744317	6.95062e-06
1516	0.00744723	8.1611e-06
1517	0.00745144	9.37749e-06
1518	0.00745558	1.04605e-05
1519	0.00745933	1.1643e-05
1520	0.00746349	1.36265e-05
1521	0.00746757	1.51642e-05
1522	0.00747182	1.64511e-05
1523	0.00747582	1.76802e-05
1524	0.00747966	1.88857e-05
1525	0.00748357	2.01418e-05
1526	0.00748733	2.13786e-05
1527	0.00749109	2.27066e-05
1528	0.00749494	2.39855e-05
1529	0.00749856	2.54796e-05
1530	0.00750248	2.72246e-05
1531	0.0075061	2.90088e-05
1532	0.00750957	3.06838e-05
1533	0.00751338	3.24993e-05
1534	0.00751687	3.43746e-05
1535	0.00752061	3.64019e-05
1536	0.00752407	3.82769e-05
1537	0.00752738	4.0217e-05
1538	0.00753099	4.22674e-05
1539	0.00753416	4.51357e-05
1540	0.00753787	4.76716e-05
1541	0.00754135	4.99732e-05
1542	0.00754433	5.22628e-05
1543	0.0075476	5.45201e-05
1544	0.00755082	5.68102e-05
1545	0.00755413	5.88801e-05
1546	0.00755731	6.14487e-05
1547	0.00756029	6.45952e-05
1548	0.00756333	6.74834e-05
1549	0.00756611	7.05281e-05
1550	0.00756903	7.34964e-05
1551	0.0075721	7.63049e-05
1552	0.00757493	7.91663e-05
1553	0.00757763	8.23369e-05
1554	0.00758008	8.5425e-05
1555	0.0075827	8.84837e-05
1556	0.00758553	9.19534e-05
1557	0.00758786	9.52698e-05
1558	0.00759024	9.86908e-05
1559	0.00759253	0.000102078
1560	0.00759479	0.000105324
1561	0.00759734	0.00010884
1562	0.00759938	0.000112764
1563	0.00760152	0.000117411
1564	0.00760326	0.000122396
1565	0.00760505	0.000127013
1566	0.00760705	0.000131682
1567	0.00760862	0.000135914
1568	0.00761063	0.000140196
1569	0.00761212	0.0001446
1570	0.00761361	0.000149086
1571	0.00761507	0.000153952
1572	0.00761626	0.000159019
1573	0.00761538	0.000168292
1574	0.00761611	0.000173381
1575	0.00761759	0.000177966
1576	0.00761837	0.000183369
1577	0.0076191	0.000189164
1578	0.00762039	0.00019419
1579	0.00762113	0.000199674
1580	0.00762169	0.000205446
1581	0.00762192	0.000211882
1582	0.00762166	0.000218645
1583	0.00762172	0.000225327
1584	0.00762188	0.000231266
1585	0.00762199	0.000238018
1586	0.00762144	0.000244112
1587	0.00762148	0.000250658
1588	0.00762025	0.000257674
1589	0.00762072	0.000264143
1590	0.00761956	0.00027134
1591	0.00761887	0.000278829
1592	0.0076171	0.000287121
1593	0.00761554	0.000294948
1594	0.00761452	0.000302497
1595	0.00761326	0.000309982
1596	0.00761181	0.000317547
1597	0.00760984	0.000325913
1598	0.00758114	0.000372336
1599	0.00757914	0.000380918
1600	0.00757802	0.000388918
1601	0.00759395	0.000396974
1602	0.00760253	0.000406498
1603	0.0076093	0.000415413
1604	0.00761601	0.000423509
1605	0.00762235	0.00043223
1606	0.00763008	0.000439604
1607	0.00763616	0.00044912
1608	0.00764162	0.000459034
1609	0.00764827	0.000467707
1610	0.00765348	0.000477241
1611	0.00766011	0.000486239
1612	0.00766539	0.00049611
1613	0.00767177	0.000505327
1614	0.00767666	0.000515523
1615	0.00768149	0.000526369
1616	0.00768686	0.000536296
1617	0.00769162	0.000547756
1618	0.0076967	0.00055731
1619	0.0077003	0.000568872
1620	0.00770388	0.000579893
1621	0.00770821	0.000591198
1622	0.00771241	0.000602285
1623	0.00771712	0.000612491
1624	0.0077215	0.000623145
1625	0.0077245	0.000635726
1626	0.00772709	0.000648694
1627	0.00773115	0.000659467
1628	0.00773624	0.000669231
1629	0.00774002	0.000680349
1630	0.00774346	0.000692606
1631	0.007746	0.000705127
1632	0.00774912	0.000716892
1633	0.00775244	0.000728501
1634	0.00775404	0.000742297
1635	0.00775618	0.000755283
1636	0.00775611	0.000771079
1637	0.0077566	0.00078633
1638	0.00776017	0.000797268
1639	0.00776205	0.000810645
1640	0.00776517	0.000822747
1641	0.0077664	0.000835954
1642	0.0077681	0.000849285
1643	0.00776933	0.000863404
1644	0.0077721	0.000875158
1645	0.0077746	0.000888582
1646	0.0077754	0.000902483
1647	0.00777705	0.000916326
1648	0.00777489	0.000936084
1649	0.00776163	0.00097218
1650	0.00776181	0.000987823
1651	0.00776305	0.00100148
1652	0.00776399	0.00101527
1653	0.00776444	0.00102982
1654	0.00776394	0.0010442
1655	0.00776476	0.00105705
1656	0.00776465	0.00107224
1657	0.00776473	0.00108789
1658	0.00776462	0.00110282
1659	0.00776337	0.00111998
1660	0.00776121	0.00113683
1661	0.00775721	0.00115658
1662	0.00775745	0.00117136
1663	0.00775871	0.00118776
1664	0.00775787	0.0012048
1665	0.0076466	0.001404
1666	0.00764511	0.00142191
1667	0.0075195	0.00172505
1668	0.00747447	0.00184506
1669	0.0074739	0.00186312
1670	0.00747034	0.00188464
1671	0.0074707	0.00190097
1672	0.00747034	0.00191727
1673	0.00742635	0.00200268
1674	0.00726717	0.00227275
1675	0.00726677	0.00228975
1676	0.00726521	0.00230892
1677	0.00726335	0.00232737
1678	0.0072607	0.00234749
1679	0.0072603	0.00236537
1680	0.0072586	0.00238341
1681	0.00725399	0.00240552
1682	0.00724992	0.00242709
1683	0.00724636	0.00244709
1684	0.00724024	0.00247124
1685	0.00723892	0.00249064
1686	0.00723604	0.00251118
1687	0.00721764	0.00255897
1688	0.00721385	0.00258136
1689	0.00720966	0.0026035
1690	0.00720577	0.00262527
1691	0.0072037	0.0026447
1692	0.00720165	0.00266368
1693	0.00719476	0.00268874
1694	0.00719038	0.00271083
1695	0.00718881	0.00272941
1696	0.00718683	0.00274934
1697	0.00718584	0.0027678
1698	0.00718281	0.00278857
1699	0.00717025	0.00280224
1700	0.00713363	0.00278017
1701	0.00720465	0.00278305
1702	0.0072562	0.00278828
1703	0.00730592	0.0027938
1704	0.00735531	0.00280097
1705	0.00740659	0.00280648
1706	0.00736321	0.00294829
1707	0.00737821	0.0030078
1708	0.00743114	0.00301124
1709	0.00748421	0.00301553
1710	0.00754658	0.00301454
1711	0.00760853	0.00302475
1712	0.00766223	0.0030342
1713	0.00771363	0.00304656
1714	0.00776828	0.0030546
1715	0.00782284	0.00307353
1716	0.00787796	0.00308168
1717	0.0079401	0.00309642
1718	0.0079947	0.00310857
1719	0.00803324	0.00315577
1720	0.00771971	0.00392036
1721	0.00776614	0.00394772
1722	0.0078057	0.00397779
1723	0.00785324	0.00399586
1724	0.00789405	0.00404571
1725	0.00793842	0.00407344
1726	0.00798602	0.00409449
1727	0.00802414	0.00412664
1728	0.00806803	0.00414934
1729	0.00794729	0.00442408
1730	0.00797274	0.00447771
1731	0.00807706	0.00449996
1732	0.00817593	0.00453403
1733	0.00828267	0.00455607
1734	0.00838933	0.00457796
1735	0.00849007	0.00460867
1736	0.00859233	0.00463908
1737	0.00869364	0.0046688
1738	0.00880002	0.00469481
1739	0.00890443	0.00472326
1740	0.00901626	0.00474119
1741	0.00911304	0.00476399
1742	0.00919969	0.00478953
1743	0.00928815	0.00481517
1744	0.0093792	0.004841
1745	0.00946177	0.00490154
1746	0.00955137	0.00495071
1747	0.00963073	0.00501565
1748	0.00971995	0.00506691
1749	0.0098007	0.0051316
1750	0.00988348	0.00519759
1751	0.00994794	0.00523282
1752	0.0100026	0.00527888
1753	0.0100651	0.00531724
1754	0.0101219	0.00536938
1755	0.0101862	0.005415
1756	0.0102416	0.0054793
1757	0.0102998	0.00555396
1758	0.010355	0.00564951
1759	0.0104124	0.00574013
1760	0.0104708	0.00578544
1761	0.0105348	0.00583427
1762	0.0105897	0.00588496
1763	0.0106402	0.0059441
1764	0.0106945	0.00600402
1765	0.0107509	0.00606506
1766	0.0108009	0.00614083
1767	0.0108527	0.00622411
1768	0.010906	0.00631824
1769	0.01096	0.00642528
1770	0.0110132	0.00656174
1771	0.011126	0.00673043
1772	0.0112351	0.00696797
1773	0.0113397	0.00734415
1774	0.0114382	0.00805494
1775	0.01153	0.00918236
1776	0.0116386	0.00896041
1777	0.0117415	0.00874555
1778	0.0118532	0.0085236
1779	0.0119635	0.00830542
1780	0.0120658	0.008322
1781	0.0121399	0.00833249
1782	0.0122087	0.00834849
1783	0.0122753	0.00836725
1784	0.0123456	0.00838325
1785	0.0124148	0.0084026
1786	0.0124859	0.00842345
1787	0.0125479	0.00845615
1788	0.0126178	0.00847891
1789	0.0126901	0.00850051
1790	0.0127534	0.00856474
1791	0.0128266	0.00862257
1792	0.0128875	0.00868833
1793	0.0129536	0.00875456
1794	0.0130201	0.00882139
1795	0.0130782	0.0089017
1796	0.0131375	0.008982
1797	0.0132018	0.00906045
1798	0.013271	0.00914235
1799	0.0133282	0.00924232
1800	0.0133947	0.00933302
1801	0.0135312	0.00943189
1802	0.0136613	0.00953645
1803	0.0137849	0.00965704
1804	0.0138951	0.00977574
1805	0.0140164	0.00987595
1806	0.0141376	0.00998383
1807	0.014258	0.0100985
1808	0.0143853	0.0102218
1809	0.0145096	0.010355
1810	0.0146322	0.0105075
1811	0.0147482	0.0106831
1812	0.0148795	0.0108604
1813	0.0150003	0.0110718
1814	0.0151147	0.0113139
1815	0.0152356	0.0115915
1816	0.0153462	0.0119208
1817	0.0154633	0.0123102
1818	0.0155749	0.0127826
1819	0.0156931	0.0133672
1820	0.0158085	0.0141037
1821	0.0159716	0.0151189
1822	0.0161286	0.0160427
1823	0.016306	0.0170836
1824	0.0164879	0.0187104
1825	0.016661	0.0187133
1826	0.0168384	0.018711
1827	0.0170096	0.0187196
1828	0.0171913	0.0187141
1829	0.0173646	0.0187182
1830	0.0175567	0.0186931
1831	0.0177912	0.0186651
1832	0.0180089	0.0186247
1833	0.0182336	0.0185798
1834	0.0184585	0.0185365
1835	0.0186794	0.0184972
1836	0.0189008	0.0184578
1837	0.0191199	0.0184245
1838	0.0193436	0.0183865
1839	0.019569	0.0183441
1840	0.019787	0.0183327
1841	0.0200383	0.0183489
1842	0.0202746	0.0183669
1843	0.0205118	0.018388
1844	0.0207519	0.0184071
1845	0.0209815	0.0184327
1846	0.0212184	0.0184523
1847	0.0214306	0.0184978
1848	0.0216228	0.0185544
1849	0.0218572	0.0185325
1850	0.0220809	0.0185074
1851	0.0224208	0.0185572
1852	0.0227562	0.0186056
1853	0.0230894	0.018659
1854	0.0234212	0.0187164
1855	0.0237543	0.0187689
1856	0.0240438	0.0188794
1857	0.0243758	0.018943
1858	0.0247113	0.0190018
1859	0.0250407	0.0190659
1860	0.0253611	0.0191443
1861	0.0256639	0.0192214
1862	0.0259372	0.0193152
1863	0.0262204	0.0194031
1864	0.0265084	0.0194891
1865	0.0267987	0.0195854
1866	0.0270871	0.0196846
1867	0.0273673	0.0197911
1868	0.0276547	0.0198972
1869	0.0279324	0.0200052
1870	0.0282423	0.0200997
1871	0.0287149	0.0201936
1872	0.0291873	0.0202814
1873	0.0296589	0.0203739
1874	0.0301293	0.0204782
1875	0.0305976	0.0205859
1876	0.0310695	0.0206992
1877	0.031549	0.0208095
1878	0.0320322	0.020924
1879	0.0324937	0.0210707
1880	0.0329463	0.0211935
1881	0.0335038	0.0213827
1882	0.0340433	0.0215811
1883	0.034595	0.0217835
1884	0.0351384	0.0220074
1885	0.0356779	0.0222476
1886	0.0362299	0.0224921
1887	0.0367757	0.0227625
1888	0.0373135	0.0230625
1889	0.0378586	0.0233775
1890	0.0383948	0.0237173
1891	0.0389808	0.024195
1892	0.0395604	0.0246812
1893	0.0401356	0.0252065
1894	0.0407221	0.0258891
1895	0.0412922	0.0266398
1896	0.0418854	0.0275399
1897	0.0424621	0.028711
1898	0.0430095	0.0302914
1899	0.0435445	0.0323718
1900	0.0436797	0.0350223
1901	0.0446372	0.0402538
1902	0.0455531	0.0461892
1903	0.0465751	0.0475974
1904	0.0474578	0.0483986
1905	0.0483046	0.0492744
1906	0.0492726	0.049927
1907	0.0501292	0.0503163
1908	0.0510755	0.0506853
1909	0.0519839	0.0510335
1910	0.0527147	0.0515347
1911	0.0532601	0.0518248
1912	0.0537679	0.0521249
1913	0.054267	0.0524101
1914	0.0547466	0.0526985
1915	0.0552227	0.0529795
1916	0.055533	0.053534
1917	0.0557956	0.0541864
1918	0.0562698	0.0545341
1919	0.0567407	0.0549286
1920	0.0571248	0.0552165
1921	0.0575986	0.0550955
1922	0.0580987	0.0549638
1923	0.0585651	0.0548427
1924	0.0590094	0.0547038
1925	0.0594039	0.0546226
1926	0.0597571	0.0545521
1927	0.0601594	0.0544479
1928	0.0605478	0.0543397
1929	0.0609164	0.0542418
1930	0.0609575	0.0544994
1931	0.061773	0.0547319
1932	0.0624199	0.0547501
1933	0.0628633	0.054732
1934	0.0632958	0.0547194
1935	0.0637207	0.0547193
1936	0.0641007	0.0547566
1937	0.0645283	0.0547279
1938	0.0649493	0.0547
1939	0.0653675	0.0546688
1940	0.0657007	0.054679
1941	0.066064	0.0557217
1942	0.0663936	0.0567721
1943	0.0667471	0.0577786
1944	0.0670601	0.058804
1945	0.067342	0.059859
1946	0.0676193	0.0609336
1947	0.0678477	0.0620912
1948	0.0680663	0.0633825
1949	0.0685677	0.0647688
1950	0.0680042	0.0666672
1951	0.0665306	0.0722483
1952	0.0682383	0.0763581
1953	0.0689156	0.0809034
1954	0.0697461	0.0857747
1955	0.0706912	0.0910011
1956	0.0711977	0.0971668
1957	0.0720745	0.103426
1958	0.0729482	0.111086
1959	0.0738083	0.116715
1960	0.074601	0.122514
1961	0.0766153	0.125216
1962	0.076282	0.128457
1963	0.0749794	0.135428
1964	0.0776659	0.139494
1965	0.0779263	0.142126
1966	0.0782762	0.146602
1967	0.0790005	0.148324
1968	0.0795846	0.150073
1969	0.0798251	0.153055
1970	0.081106	0.156704
1971	0.0816955	0.159781
1972	0.0811237	0.170965
1973	0.0832704	0.172644
1974	0.0832028	0.173487
1975	0.0822872	0.173641
1976	0.078776	0.18224
1977	0.0754559	0.188846
1978	0.0755546	0.193356
1979	0.0765083	0.197706
1980	0.077083	0.200906
1981	0.0764752	0.204604
1982	0.0761023	0.208579
1983	0.0780289	0.218352
1984	0.0736328	0.24412
1985	0.0711489	0.25467
1986	0.0726215	0.261798
1987	0.0747499	0.271366
1988	0.0750627	0.283347
1989	0.0754035	0.292703
1990	0.0729852	0.293712
1991	0.0712902	0.295688
1992	0.06605	0.299748
1993	0.0661749	0.303496
1994	0.0627433	0.309397
1995	0.0645333	0.314767
1996	0.0649633	0.315724
1997	0.0666812	0.324235
1998	0.0592358	0.334361
1999	0.0664286	0.339432
2000	0.0681844	0.346128
2001	0.0670767	0.344884
2002	0.0673388	0.353249
2003	0.0679501	0.357775
2004	0.0692483	0.365537
