# Supplementary material for: Smaller global and regional carbon emissions from gross land use change when considering sub-grid secondary land cohorts in a global dynamic vegetation model
Source: Copernicus journal article supplement (doi:10.5194/bg-2017-329), 2017-09-04
Supplement: Supplementary file 1 [file bg-2017-329-supplement.zip › data/Fig5.xls]

## Sheet: No age dynamics
	South & Central America	South & Southeast Asia	Africa & Middle East	North America	China Region	Western Europe	Former Soviet Union	Pacific Developed Region
1900	0.0747763	0.0510668	0.061117	0.268192	0.0621419	0.0223227	0.17667	0.0068218
1901	0.0872153	0.0822557	0.0206945	0.164041	0.0436169	0.0421301	0.115966	0.00783545
1902	0.0772453	0.0396001	0.171307	0.191868	0.0206438	0.0516326	0.200568	0.0080314
1903	0.0946575	0.0884783	0.130789	0.249951	0.0539996	0.0429356	0.212263	0.00990459
1904	0.090077	0.110846	0.100368	0.166442	0.0329032	0.0529951	0.315823	0.00852583
1905	0.103963	-0.0763079	0.0186304	0.19725	0.0330715	0.0221621	0.195882	0.0122603
1906	0.084795	0.000423662	0.146292	0.179614	0.0638803	0.0492654	0.219241	0.00861318
1907	0.112571	0.0949122	0.0542004	0.204968	0.030236	0.0270685	0.305103	0.00428638
1908	0.0864317	0.0253803	0.0712878	0.167922	0.0590997	0.0439623	0.377675	0.00872753
1909	0.0858183	0.0651164	0.0866366	0.201441	0.0427971	0.0294925	0.282692	0.00378844
1910	0.101224	0.0553567	0.0469698	0.15542	0.0729804	0.0216963	0.272256	0.00981595
1911	0.107194	0.0514738	0.0328816	0.162055	0.07346	0.0333739	0.151703	0.00876167
1912	0.132997	-0.0516117	0.0981138	0.155888	0.0656304	0.0372774	0.129719	0.00734337
1913	0.123827	0.159264	0.0672592	0.176027	0.0457477	0.0503277	0.174196	0.0143833
1914	0.129036	0.0295468	0.116616	0.230552	0.0573311	0.0474587	0.184203	0.00847284
1915	0.114569	0.068691	0.0533136	0.172938	0.0656485	0.0270718	0.134104	0.00183591
1916	0.129085	0.092435	0.0447257	0.1934	0.0743022	0.0292779	0.170192	-0.00630508
1917	0.157688	0.165477	0.137154	0.177359	0.052873	0.0355738	0.087948	0.0245697
1918	0.11704	0.059701	0.072399	0.137184	0.0686008	0.0210566	0.178751	0.0139452
1919	0.201445	-0.157723	0.0566394	0.187569	0.0373976	0.0537758	0.127498	0.00555757
1920	0.183285	0.181941	0.0794356	0.152743	0.0512547	0.00413497	-0.0979926	0.00352766
1921	0.214696	0.0823239	0.10824	0.136648	0.0426716	0.0240752	0.0774354	0.021181
1922	0.2386	0.012913	0.0759379	0.171233	0.0450393	0.0357762	0.143484	0.011503
1923	0.233544	0.111246	0.132167	0.163371	0.0504937	0.0287732	0.154101	0.00433643
1924	0.200159	0.0385541	0.0287198	0.233136	0.0544631	0.043368	0.125121	0.0137306
1925	0.160994	0.0773614	0.0463797	0.1693	0.0603114	0.0567808	0.136512	0.018968
1926	0.212775	0.0301594	0.103177	0.173276	0.0709737	0.0396535	0.227756	0.0121119
1927	0.217188	-0.0252417	0.0393089	0.17902	0.0449	0.0644872	0.18703	0.00931876
1928	0.201778	0.0633735	0.110637	0.150908	0.0579784	0.0212204	0.261637	0.0144733
1929	0.156401	0.138687	0.114102	0.193529	0.0519014	0.033042	0.169184	0.00531335
1930	0.251307	0.00355078	0.124714	0.145766	0.0523141	0.0180854	0.183299	0.00712566
1931	0.311227	0.0682985	0.124883	0.119916	0.0793389	0.0687535	0.140289	0.0256056
1932	0.33045	0.0906463	0.101821	0.135036	0.0700509	0.0120229	0.101552	0.00570906
1933	0.321735	0.154697	0.163503	0.096516	0.0632652	0.0828245	0.228186	0.00176199
1934	0.279634	0.0750051	0.17196	0.186603	0.125548	-0.0126424	0.16503	0.0157718
1935	0.272774	0.0313641	0.205735	0.160364	0.0573579	0.0468063	0.284802	0.0228554
1936	0.43175	0.106602	0.232063	0.0785488	0.0438585	0.0366416	0.0242772	0.0133917
1937	0.302651	0.124351	0.238021	0.155116	0.0823302	0.0412683	0.196366	0.0088593
1938	0.322986	0.0203095	0.163789	0.145873	0.0711356	0.0448155	0.0387625	0.0126892
1939	0.341993	0.149528	0.261594	0.135741	0.0748507	0.0317264	0.180397	0.0199234
1940	0.361372	0.0828152	0.209292	0.140126	0.0780478	0.049611	0.235315	0.0174288
1941	0.459209	0.175395	0.283028	0.200414	0.0615919	0.057399	0.227662	0.0168681
1942	0.32298	0.140937	0.32771	0.21344	0.047209	0.0311243	0.264042	0.00511654
1943	0.32798	0.106881	0.380578	0.182819	0.0582261	0.0137715	0.199654	0.0257879
1944	0.301039	0.0476698	0.293547	0.138994	0.0596306	0.0261127	0.182133	0.029963
1945	0.310167	0.0560755	0.364453	0.184045	0.0533923	0.027596	0.27522	0.0154708
1946	0.32841	0.0785326	0.340856	0.12801	0.0955478	0.0387757	0.203917	0.0182147
1947	0.409944	0.12651	0.500963	0.183252	0.0793848	0.0167429	0.186307	0.0384468
1948	0.310705	0.0991192	0.505097	0.114679	0.0808857	0.028914	0.15524	0.0336948
1949	0.373358	0.107285	0.364458	0.144236	0.0959605	0.00304875	0.0501294	0.0301711
1950	0.241899	0.0535027	0.467895	0.210038	0.0652043	0.0231702	0.171449	0.0324165
1951	0.367152	0.126238	0.485406	0.213603	0.0746728	0.028003	-0.0657405	0.0477335
1952	0.407823	0.270041	0.524397	0.0785173	0.0971318	0.0355187	0.0120542	0.0308612
1953	0.459437	0.0219707	0.52136	0.0730851	0.100811	0.0366311	-0.0192176	0.0222439
1954	0.416366	0.274412	0.56493	0.185221	0.118209	0.0164551	0.0128644	0.0531598
1955	0.481562	0.178229	0.751731	0.163291	0.118399	0.0381495	-0.110855	0.0682799
1956	0.546271	0.25987	0.570751	0.0671495	0.130902	0.0473746	-0.00474876	0.0781755
1957	0.453087	0.101167	0.570305	0.152666	0.106285	0.0181766	-0.0669338	0.0283165
1958	0.585957	0.163811	0.502087	0.179934	0.11092	0.0147443	-0.099759	0.0303562
1959	0.51678	0.169386	0.577122	0.134581	0.156354	0.0298783	-0.0245281	0.0917068
1960	0.579773	0.239342	0.583032	0.176473	0.140161	0.0389124	-0.0549856	0.054732
1961	0.488537	0.092815	0.510135	0.121585	0.146165	0.00568469	-0.0742654	0.00456951
1962	0.529968	0.159267	0.554765	0.104138	0.16114	0.0320264	-0.0779606	0.0491345
1963	0.48941	0.231261	0.567886	0.0957542	0.133544	0.0219505	-0.129152	0.0292755
1964	0.608996	0.206859	0.390541	0.05064	0.152456	0.0418551	-0.103534	0.0406455
1965	0.616008	0.0930766	0.324863	0.152896	0.12496	0.0213288	-0.0551436	-0.0707797
1966	0.600449	0.0387963	0.469244	0.140223	0.125025	0.0339741	-0.115771	0.0170521
1967	0.511783	0.0645681	0.364746	0.0982432	0.173925	0.0535512	-0.0069266	0.0273324
1968	0.448319	0.376102	0.514834	0.178574	0.144346	0.0197251	-0.0662377	-0.000199094
1969	0.624613	0.0855919	0.369979	0.141184	0.171714	0.0377958	-0.0496702	0.0539292
1970	0.742684	0.169051	0.273307	0.112238	0.161363	0.0247043	-0.0487285	-0.016137
1971	0.550175	0.379811	0.303696	-0.0155988	0.181917	0.022447	-0.0702094	0.0623512
1972	0.690237	-0.00195885	0.395831	0.217564	0.157717	0.0293937	-0.209627	0.064196
1973	0.70547	0.204526	0.239337	0.125714	0.221259	0.0425914	-0.0677882	-0.0504518
1974	0.736295	0.20757	0.42201	0.0862887	0.215335	0.0139563	-0.14105	0.102429
1975	0.655237	0.188576	0.330389	0.125151	0.21312	0.023968	-0.118949	-0.0194679
1976	0.736348	0.184448	0.425824	0.0858302	0.221774	0.063687	0.00517994	0.0849083
1977	0.654624	0.102839	0.301862	0.111059	0.182637	0.0178777	-0.0194479	0.00103072
1978	0.573697	0.165151	0.465871	0.156646	0.226023	0.0427887	0.0121563	-0.00131559
1979	0.781572	0.14646	0.299162	0.0913472	0.212128	0.00926036	-0.115985	0.034511
1980	0.586306	0.244587	0.308902	0.157966	0.209866	0.0218918	0.00778306	-0.0634547
1981	0.458864	0.242583	0.265797	0.201802	0.32657	0.00296844	-0.135144	-0.00522897
1982	0.796371	0.183749	0.304876	0.194691	0.306541	0.0229016	-0.030742	0.036752
1983	0.620846	0.0187196	0.0633538	0.215322	0.346637	0.0102299	-0.00260311	-0.00216952
1984	0.689107	0.303082	0.389877	0.0682343	0.376586	0.0372973	-0.00972283	0.0910207
1985	0.626614	0.192799	0.36457	0.24866	0.40412	0.0126902	0.00794697	0.0207511
1986	0.623328	0.122567	0.4631	0.210239	0.353568	0.0182943	-0.064694	0.0416807
1987	0.651449	0.221836	0.322034	0.160789	0.416788	0.00666708	-0.0236245	0.0107494
1988	0.351267	0.290883	0.393819	0.0777849	0.428993	0.0137602	-0.06854	0.00450058
1989	0.77011	0.334689	0.414587	0.160527	0.457803	0.0289037	-0.115788	0.0924807
1990	0.7837	0.214938	0.365282	0.129076	0.470551	0.0236609	-0.00201762	0.0287394
1991	0.62721	0.10588	0.197899	0.157189	0.388413	0.0242509	-0.0198958	-0.0512034
1992	0.933861	0.115871	0.27814	0.22096	0.355811	0.00426055	-0.09529	0.0235871
1993	0.73442	0.233068	0.335865	0.290704	0.360746	-0.000875771	0.00196576	0.023611
1994	0.52863	0.233463	0.230337	0.108073	0.339211	-0.00442176	-0.0353436	0.0246049
1995	0.33761	0.199889	0.321845	0.239016	0.293689	0.00377992	-0.0642762	-0.0145088
1996	0.75381	0.171812	0.504407	0.162423	0.308986	0.0310968	-0.0780072	0.059156
1997	0.776039	0.148614	0.379392	0.230726	0.247442	0.00134051	-0.101748	-0.00152233
1998	0.679163	0.194508	0.259363	0.150845	0.29437	0.0309823	-0.158884	0.0189872
1999	0.694239	0.449611	0.348648	0.157166	0.314466	-0.00356716	-0.170894	0.0302547
2000	0.854546	0.197997	0.383464	0.199715	0.281954	-0.00845415	-0.0783538	0.00991195
2001	0.699022	0.273934	0.310739	0.0177056	0.204016	0.000388741	-0.00902861	0.0378515
2002	0.442129	0.199442	0.302138	0.213179	0.234259	0.0100181	-0.157821	-0.0251214
2003	0.652286	0.245622	0.342993	0.111807	0.261043	0.0127457	-0.0967642	-0.034363
2004	0.514558	0.327871	0.329809	0.190403	0.317361	0.0121731	-0.0474987	-0.00441325
2005	0.616129	0.332264	0.213754	0.202046	0.242324	0.00858608	-0.0453076	0.0256956

## Sheet: With age dynamics
	South & Central America	South & Southeast Asia	Africa & Middle East	North America	China Region	Western Europe	Former Soviet Union	Pacific Developed Region
1900	0.00656275	0.0440338	-0.00149017	0.276074	0.0632937	0.0277063	0.180789	0.00679135
1901	0.0770642	0.0785243	0.0257413	0.179809	0.0424566	0.0486005	0.126609	0.0101417
1902	0.0664164	0.0160302	0.14498	0.205635	0.0217634	0.0555292	0.214135	0.0101102
1903	0.0603299	0.0442774	0.0845889	0.269044	0.0580438	0.0466418	0.229639	0.00956814
1904	0.0390205	0.128542	0.0563375	0.175741	0.0312578	0.0474888	0.333848	0.00920298
1905	0.0483297	-0.0703149	0.0259794	0.214296	0.0331206	0.0232611	0.212701	0.00912273
1906	0.0558881	-0.0326888	0.0955925	0.189155	0.0608823	0.0600354	0.23476	0.00954124
1907	0.0835762	0.09535	-0.00794078	0.231618	0.0326774	0.036589	0.320795	0.0069059
1908	0.0731389	0.0018407	0.0661394	0.180286	0.0619508	0.0508299	0.398403	0.00993396
1909	0.0832457	0.0807949	0.076262	0.233782	0.045905	0.032874	0.30019	0.00432205
1910	0.0667289	0.0539318	0.00372332	0.172562	0.0743789	0.0256677	0.288313	0.00937657
1911	0.0657233	0.0366797	0.00213828	0.181682	0.0741473	0.0389419	0.157768	0.00740032
1912	0.0867038	-0.0823178	0.0610602	0.18237	0.0633551	0.0461233	0.144421	0.00617439
1913	0.107762	0.132213	0.0414185	0.196378	0.0437422	0.0579451	0.196183	0.0109719
1914	0.112756	0.0312649	0.0852068	0.248334	0.0556132	0.0591692	0.202515	0.00969052
1915	0.118247	0.0792839	0.0503313	0.194915	0.067984	0.0349987	0.142893	0.00426593
1916	0.116536	0.057451	0.0839528	0.227351	0.0702885	0.0321479	0.183764	-0.00700682
1917	0.151426	0.15448	0.128495	0.200079	0.0554917	0.0370203	0.102771	0.0259521
1918	0.129167	0.0663801	0.0944692	0.156778	0.0672877	0.0238017	0.192944	0.0141015
1919	0.168662	-0.175978	0.0431455	0.204769	0.0370634	0.0635379	0.155045	0.0076936
1920	0.16961	0.17262	0.110752	0.17656	0.052341	0.010223	-0.0840181	0.00477891
1921	0.164644	0.0322987	0.108354	0.166584	0.0444059	0.0258607	0.078578	0.019643
1922	0.188818	0.0269842	0.151425	0.192895	0.0419726	0.04386	0.148621	0.0111886
1923	0.223234	0.0999205	0.096643	0.180525	0.0475603	0.0297091	0.157451	0.004068
1924	0.164971	0.0217826	0.0510894	0.246234	0.0524191	0.0444365	0.128746	0.0127923
1925	0.122158	0.0736651	0.0255689	0.189726	0.0580869	0.0627788	0.144301	0.0174743
1926	0.185816	-0.0124937	0.0891159	0.188899	0.0653067	0.0455724	0.238417	0.0135688
1927	0.183111	-0.0340021	0.0785004	0.210585	0.0392298	0.0683096	0.193245	0.0122431
1928	0.185302	0.057126	0.0996358	0.164449	0.0599744	0.0236394	0.271233	0.0133814
1929	0.148276	0.111174	0.144371	0.203355	0.0503769	0.0374149	0.178733	0.00480235
1930	0.214604	-0.0200655	0.0987165	0.15819	0.0488446	0.024517	0.192705	0.00716963
1931	0.262864	0.0712528	0.170535	0.136035	0.0853845	0.0717697	0.16424	0.0267949
1932	0.29282	0.0793995	0.0927456	0.138447	0.0661095	0.0156791	0.129485	0.00569638
1933	0.270165	0.10662	0.223074	0.109135	0.0573088	0.0855982	0.247382	-0.00158636
1934	0.244953	0.0808176	0.174397	0.20197	0.12768	-0.00336715	0.177804	0.0223902
1935	0.233315	0.0263919	0.207587	0.166619	0.0548282	0.0497623	0.301408	0.0212988
1936	0.397874	0.097206	0.218032	0.0812453	0.0394376	0.0466842	0.0471005	0.0116644
1937	0.254534	0.107638	0.220447	0.161272	0.0840817	0.040214	0.218028	0.00631929
1938	0.300563	0.00815995	0.185401	0.155517	0.0788466	0.0475224	0.0607636	0.0132255
1939	0.322444	0.13604	0.291562	0.14022	0.074958	0.0408198	0.197461	0.0168985
1940	0.334676	0.0781054	0.197529	0.142421	0.0726942	0.0577564	0.254021	0.0175515
1941	0.408668	0.126652	0.28486	0.15869	0.0643971	0.0694128	0.261739	0.0175844
1942	0.274028	0.0729787	0.323838	0.219649	0.0402193	0.0314535	0.306173	-0.000413872
1943	0.279136	0.153929	0.423844	0.202131	0.0589316	0.0155736	0.231289	0.0263092
1944	0.245676	0.0324535	0.267615	0.141694	0.0546522	0.0310959	0.218472	0.0346461
1945	0.262375	0.0187265	0.3823	0.176064	0.0517054	0.0296245	0.309303	0.0132114
1946	0.291885	0.0763258	0.381598	0.122164	0.0900499	0.0452903	0.236727	0.0119612
1947	0.365274	0.112127	0.478318	0.194318	0.0751961	0.0150167	0.227722	0.043306
1948	0.254636	0.112888	0.479006	0.12399	0.0760331	0.040594	0.198181	0.0349951
1949	0.300967	0.0804467	0.368908	0.117166	0.0863437	-0.00199693	0.0860597	0.0272742
1950	0.194278	0.0359048	0.468648	0.209043	0.0678983	0.0220559	0.207257	0.0362079
1951	0.35284	0.129451	0.605929	0.215678	0.0764612	0.0316233	-0.0467826	0.0509345
1952	0.360258	0.266738	0.547408	0.0930566	0.0959884	0.0488282	0.0437548	0.0293176
1953	0.423959	-0.00726573	0.542183	0.0702924	0.0959007	0.0496273	0.00606979	0.0289398
1954	0.40463	0.260197	0.615728	0.192784	0.124138	0.0267406	0.0354894	0.0504647
1955	0.443081	0.142784	0.773602	0.146881	0.10774	0.0544062	-0.0837308	0.070879
1956	0.517956	0.264926	0.593875	0.0947679	0.130521	0.0585394	0.0409591	0.0929997
1957	0.431634	0.0797566	0.580019	0.118074	0.104593	0.0202932	-0.034885	0.03419
1958	0.585137	0.10778	0.556727	0.164192	0.116641	0.0219715	-0.0632418	0.0154205
1959	0.517465	0.182555	0.634673	0.124364	0.154786	0.0273716	0.0205511	0.098507
1960	0.533574	0.209693	0.650981	0.161505	0.153046	0.0599274	0.00328875	0.0501585
1961	0.406639	0.00716361	0.464005	0.103263	0.143448	0.00899065	-0.0728362	-0.00153891
1962	0.490458	0.137774	0.501834	0.0990911	0.165454	0.0328694	-0.0809717	0.048525
1963	0.477459	0.221833	0.618049	0.0917595	0.145139	0.0210203	-0.132814	0.020051
1964	0.529094	0.163845	0.330326	0.0519932	0.155325	0.0390243	-0.0938944	0.0350847
1965	0.609058	0.0850758	0.288001	0.143738	0.129302	0.026769	-0.0499873	-0.0725559
1966	0.593471	0.0273124	0.42056	0.119335	0.129951	0.0405137	-0.101105	0.0065712
1967	0.534548	0.0325092	0.261312	0.0911037	0.160281	0.0574246	0.000686675	0.0261532
1968	0.430983	0.342204	0.376342	0.182201	0.130298	0.0143375	-0.062359	-0.00912927
1969	0.597524	0.0682955	0.277251	0.106334	0.171692	0.0324523	-0.0436506	0.0546569
1970	0.692546	0.192362	0.137129	0.135869	0.153487	0.0213036	-0.025834	-0.019293
1971	0.456126	0.336456	0.181804	-0.0363653	0.172425	0.0164742	-0.057456	0.0613758
1972	0.647119	0.00667888	0.299981	0.214185	0.144926	0.0243233	-0.210077	0.0659116
1973	0.600259	0.164038	0.149535	0.117726	0.211172	0.0412139	-0.0486379	-0.0770433
1974	0.649944	0.21359	0.352913	0.0757159	0.214029	0.0173763	-0.135957	0.0909788
1975	0.609146	0.0790486	0.243564	0.117616	0.208765	0.024666	-0.112711	-0.0261397
1976	0.647956	0.214853	0.344825	0.0908905	0.223667	0.0502245	0.0220581	0.0970623
1977	0.601434	0.0806395	0.166875	0.114714	0.180368	0.0185166	-0.00965774	0.00595014
1978	0.488103	0.185243	0.413321	0.13884	0.225067	0.0395161	0.0237539	-0.023947
1979	0.710128	0.124536	0.201336	0.0736933	0.212031	0.00779374	-0.108858	0.0383238
1980	0.451437	0.222501	0.199775	0.147264	0.198754	0.021005	0.0173686	-0.0727767
1981	0.389409	0.246282	0.248647	0.176296	0.319422	-0.00889673	-0.140963	-0.00222564
1982	0.718589	0.167954	0.257726	0.194264	0.313131	0.0146358	-0.0255779	0.0292301
1983	0.529198	-0.0392077	-0.0351194	0.192272	0.338873	-0.000699949	0.00109452	-0.00380313
1984	0.579396	0.315295	0.336523	0.0419456	0.378529	0.0304513	-0.00439531	0.0795802
1985	0.447621	0.208367	0.376417	0.230827	0.421178	0.00605901	0.0233814	0.0207743
1986	0.51766	0.096862	0.370339	0.188402	0.367056	0.0145417	-0.0570728	0.0374894
1987	0.557073	0.184183	0.332821	0.14895	0.422913	0.00513639	-0.0197246	0.000218518
1988	0.222855	0.260422	0.362081	0.0551139	0.418588	0.00768901	-0.0721007	-0.0107256
1989	0.629227	0.291093	0.470937	0.152247	0.469711	0.00931734	-0.119417	0.0987843
1990	0.705551	0.108077	0.268864	0.108191	0.488746	0.0124833	0.00667763	0.0220603
1991	0.470297	0.10413	0.178911	0.131372	0.387745	0.0223532	-0.0129452	-0.0522634
1992	0.827294	0.0297608	0.244162	0.213046	0.337719	-0.0049905	-0.0954544	-0.00841029
1993	0.661442	0.171541	0.334313	0.280669	0.355025	-0.0099384	0.010505	0.0173025
1994	0.418576	0.110303	0.236659	0.0973751	0.317776	-0.0327667	-0.039	0.0296265
1995	0.223438	0.104203	0.281375	0.205776	0.304186	-0.00317721	-0.0690929	-0.0297396
1996	0.641411	0.103223	0.513853	0.120424	0.308717	0.0260627	-0.0826911	0.0603316
1997	0.651972	0.0816239	0.3728	0.20689	0.216797	-0.0034821	-0.0990388	-0.0201994
1998	0.537964	0.101828	0.273872	0.139958	0.286686	0.0144009	-0.1735	0.0106904
1999	0.547672	0.430945	0.413392	0.144051	0.314248	-0.0154735	-0.17753	0.00974992
2000	0.701962	0.157682	0.439687	0.188915	0.256192	-0.0231932	-0.0811419	-0.0193625
2001	0.582172	0.23183	0.224518	-0.0150138	0.194008	-0.0113667	0.00128853	0.0299665
2002	0.302224	0.202339	0.228141	0.170699	0.209858	0.00384012	-0.166479	0.00459331
2003	0.499741	0.16745	0.358018	0.10132	0.267873	-0.00697484	-0.106881	-0.0548529
2004	0.348435	0.256771	0.332941	0.159027	0.320069	-0.00189066	-0.0483065	-0.0135251
2005	0.524011	0.261656	0.256713	0.188398	0.238687	-0.0080145	-0.0422747	0.0271499

## Sheet: Stocker
Year	South & Central America	South & Southeast Asia	Africa & Middle East	North America	China Region	Western Europe	Former Soviet Union	Pacific Developed Region
1900	0.147457	0.0570155	0.113583	-0.0534954	0.0527508	0.101646	0.0526983	0.0232699
1901	0.113485	0.0655556	0.155158	0.233038	0.0632144	0.0587254	0.0947672	0.0377157
1902	0.16977	0.050671	0.145368	0.320672	0.0364767	0.0996403	0.151381	-0.0204434
1903	0.20381	0.0405116	0.0974971	0.439311	0.0715565	0.0552316	0.132984	0.0290062
1904	0.223219	0.0755327	0.132862	0.30289	0.097542	0.0502022	0.23964	0.0644592
1905	0.213477	0.0592084	0.126611	0.311638	0.112791	0.00481913	0.113973	0.0423003
1906	0.164694	0.0415566	0.176032	0.28754	0.0686848	0.0891233	0.094973	0.0337273
1907	0.124252	0.0693931	0.228721	0.377386	0.0406093	0.0726235	0.197007	0.0567622
1908	0.155235	0.0432913	0.0955071	0.127939	0.0449151	0.0964031	0.21947	0.0616682
1909	0.155407	0.0450458	0.121362	0.179439	0.0227496	0.102465	0.143031	0.0437635
1910	0.186337	0.101134	0.156041	0.109556	0.0617201	0.115337	0.153134	0.0529802
1911	0.234647	0.11934	0.13763	0.034882	0.0677021	0.0532903	0.165413	0.0587206
1912	0.233773	0.0560297	0.0860435	0.364963	0.0559489	0.0984433	0.133811	0.0333708
1913	0.243251	0.0630578	0.097872	0.264579	0.0198063	0.124582	0.170903	0.04647
1914	0.272084	0.0796338	0.128766	0.143603	-0.0118026	0.0781497	0.145633	0.038939
1915	0.186241	0.0423795	0.135088	0.483791	0.0546272	0.0813718	0.142144	-0.0037947
1916	0.206424	0.115099	0.173145	0.340345	0.0413579	0.0687341	0.227218	0.0444116
1917	0.271238	0.152356	0.230446	0.276063	-0.00504961	0.0313486	0.0937741	0.104503
1918	0.29663	0.10584	0.19865	0.0386038	0.0386282	-0.00539679	0.126232	0.0778183
1919	0.334857	0.00124439	0.0736681	0.100277	-0.0222527	0.0914433	0.135171	0.0260789
1920	0.259038	0.0674715	0.160723	0.294349	0.020387	0.0123084	-0.0390507	0.0593119
1921	0.343849	0.0508672	0.183426	0.0870602	0.00499476	-0.0312227	-0.0196869	0.0838841
1922	0.325643	0.0761345	0.0635492	0.13354	0.0118033	0.0536119	0.0443905	0.0438892
1923	0.310142	0.0690937	0.267501	0.37327	-0.020212	0.0294597	0.098787	0.0272948
1924	0.288089	0.0780245	0.204856	0.422974	-0.00425617	0.0957242	0.0611129	-0.0030162
1925	0.252538	0.104782	0.231444	-0.00888833	-0.0149693	0.103543	0.0838053	0.0726612
1926	0.315162	0.0915682	0.231565	0.19761	0.030019	0.0620818	0.224268	0.013665
1927	0.289669	0.0803177	0.181089	0.387881	0.0455566	0.0651072	0.0814852	0.0278476
1928	0.374915	0.109417	0.185741	0.408175	0.016084	0.0591766	0.23734	0.0423793
1929	0.292654	0.101012	0.261051	0.266124	0.0327421	0.00668574	0.0568365	0.0474503
1930	0.327913	0.101233	0.245806	-0.0178096	0.065306	0.049987	0.0507395	0.0500746
1931	0.408443	0.0925705	0.238472	-0.147935	0.06677	0.095157	0.0450169	0.048079
1932	0.345915	0.094389	0.213232	0.145351	0.0766624	0.0171575	0.0629547	0.0644922
1933	0.413219	0.106857	0.168757	0.208859	0.0351208	0.112187	0.276869	0.0424256
1934	0.359832	0.148831	0.289664	0.0535438	0.100022	-0.0188915	0.128592	0.087918
1935	0.458395	0.0797701	0.280101	0.205677	0.021878	0.0341352	0.189945	0.0308722
1936	0.390213	0.0789726	0.316301	0.15369	0.0125058	0.0582647	0.043582	0.014152
1937	0.405891	0.133578	0.284637	0.0500836	0.00942414	0.0677046	-0.0416107	0.0310711
1938	0.412452	0.129405	0.213141	0.184671	0.0335548	0.0338883	0.0690925	0.0225308
1939	0.375717	0.10508	0.270109	0.168653	0.0548295	0.0339036	0.0736536	0.055979
1940	0.390942	0.100968	0.367078	0.251985	0.0235417	0.146326	0.0594967	0.033891
1941	0.408637	0.0681828	0.142286	0.114752	-0.0274796	0.12526	0.262125	0.0626494
1942	0.427883	0.111104	0.207266	0.439766	-0.0468302	-0.0234309	0.246112	0.0450158
1943	0.391829	0.146909	0.299909	0.317235	-0.00696668	-0.0490865	0.193974	0.0625544
1944	0.309777	0.15895	0.202298	0.0963659	-0.0227743	-0.0523859	0.195162	0.0345571
1945	0.353316	0.138161	0.19707	0.36139	0.0075961	-0.00497791	0.238136	0.0522428
1946	0.46187	0.125823	0.167702	0.234636	0.0120138	-0.0799285	0.175116	-0.0178898
1947	0.505674	0.133461	0.270597	0.123547	0.0617445	-0.0928762	0.155277	0.0714671
1948	0.43504	0.126251	0.324988	0.0466846	0.0932971	-0.0207609	0.0834805	0.062439
1949	0.317558	0.160644	0.105777	0.109906	0.120907	0.0169796	0.143637	0.0962837
1950	0.385746	0.134627	0.316595	0.255171	0.0776122	0.0223139	0.130928	0.102329
1951	0.335131	0.152143	0.416844	0.158566	0.0990857	0.0387396	0.0204527	0.0254732
1952	0.395889	0.158912	0.421298	0.0489917	0.0885769	0.0887927	0.0156291	-0.0224234
1953	0.383359	0.168676	0.461289	-0.161333	0.0935351	0.0544938	0.0834855	0.0642479
1954	0.499333	0.198869	0.423444	-0.0080449	0.16927	0.135821	0.096025	0.067091
1955	0.550585	0.225581	0.506509	-0.125702	0.110049	0.0940542	0.162595	0.128802
1956	0.520707	0.294498	0.543749	0.115572	0.162389	0.137919	0.213715	0.151966
1957	0.517074	0.289697	0.486056	0.167838	0.222968	0.0691025	0.112977	0.0449347
1958	0.394179	0.179095	0.359886	0.250324	0.119505	0.103995	0.23741	0.010471
1959	0.445721	0.278187	0.332986	0.0914988	0.108715	0.0528553	0.223997	0.0532937
1960	0.477838	0.266403	0.420376	0.11996	0.180856	0.1422	0.243103	0.098295
1961	0.402042	0.288192	0.483986	0.12788	0.0749129	0.054304	0.212034	0.000916593
1962	0.456867	0.296749	0.369737	-0.0163501	0.137753	0.106482	0.209247	0.0535701
1963	0.326614	0.280183	0.450439	-0.136666	0.0134578	0.0444405	0.0625072	0.0873839
1964	0.507747	0.209747	0.237941	0.078225	0.112022	0.0765128	0.198517	0.0549547
1965	0.552213	0.236437	0.148172	0.184888	0.0832014	0.143324	0.202364	-0.0405594
1966	0.643401	0.134129	0.155657	0.198605	-0.036809	0.079796	0.011564	-0.00200128
1967	0.600169	0.244671	0.469867	0.125202	-0.018441	0.0579385	0.0998703	0.0191755
1968	0.53495	0.207564	0.42585	0.12519	0.10484	0.0547617	0.169779	0.0840916
1969	0.539905	0.202166	0.334666	0.135221	0.0844497	0.0789357	0.198351	0.020363
1970	0.560886	0.219222	0.0897881	0.052662	0.146141	0.112313	0.196223	0.0331827
1971	0.68278	0.274445	0.159381	0.0371511	0.139472	7.32392e-05	0.0776412	0.110822
1972	0.592242	0.235971	0.21624	0.168563	0.0797526	0.0734399	0.0349929	0.0565236
1973	0.655934	0.177499	0.17346	0.141928	0.104716	0.0191867	0.0327199	0.0574699
1974	0.63489	0.219536	0.37504	0.257998	0.118734	0.0453323	0.103468	0.214645
1975	0.65522	0.301518	0.390688	0.0488539	0.0983037	-0.02175	-0.0219785	0.142986
1976	0.634573	0.30473	0.430175	0.111697	0.261319	0.0325831	0.124744	-0.0462252
1977	0.428398	0.24733	0.380276	-0.157972	0.0354676	-0.000933849	0.127256	0.0272067
1978	0.624096	0.306377	0.236744	0.0994984	0.0195936	0.122356	0.335091	0.038135
1979	0.680927	0.240682	0.290422	0.228199	0.0621882	0.0291265	0.0863002	0.0797623
1980	0.599822	0.206818	0.0751376	0.0782516	0.0987871	0.121368	0.258984	-0.00495891
1981	0.633102	0.22613	0.116331	-0.0574129	0.148914	-0.0143297	0.0126589	0.0167162
1982	0.627641	0.282265	0.209851	0.266593	0.125014	-0.0761082	0.105414	-0.0391145
1983	0.657848	0.227502	-0.0505879	0.0836396	0.243355	-0.0646388	0.129444	0.0384667
1984	0.632309	0.271612	-0.0532458	0.110184	0.227741	0.0715509	0.158026	0.11291
1985	0.662725	0.229775	0.268915	0.070056	0.264304	0.0422099	0.177436	-0.0133381
1986	0.554673	0.237429	0.303597	0.0476346	0.142887	-0.028224	0.129447	0.067859
1987	0.604565	0.203355	0.024371	-0.00218548	0.200298	0.0246111	0.0759801	0.0401898
1988	0.447081	0.208277	0.336893	0.00333934	0.20197	0.024403	0.0635851	0.0300849
1989	0.462841	0.283202	0.450775	-0.0881981	0.247802	-9.50936e-05	0.110622	0.106241
1990	0.748119	0.269062	0.151265	0.0509926	0.250927	-0.0558088	0.221882	0.0891982
1991	0.607342	0.314512	0.290483	0.0522575	0.123704	0.000341034	0.139066	-0.0642939
1992	0.609995	0.200793	-0.191797	0.369016	0.182418	-0.0293705	0.121061	0.0269396
1993	0.404463	0.204845	0.168566	0.352622	0.255547	-0.0180317	0.194707	0.0801497
1994	0.431813	0.248568	0.164585	0.0282547	0.0544435	-0.063997	0.163362	-0.112306
1995	0.490541	0.205826	0.175797	0.0643671	0.208938	0.0679381	-0.0223202	0.0454562
1996	0.523303	0.263977	0.417737	0.166956	0.180124	0.117876	0.034459	0.0918383
1997	0.552611	0.308838	0.391627	0.186996	0.0691733	0.0430677	0.121611	0.0628467
1998	0.529769	0.166062	0.337437	-0.0758436	0.0085438	0.0746094	0.0338889	0.0408594
1999	0.527476	0.238054	0.311471	0.048579	0.212144	-0.000196943	-0.0166048	0.117612
2000	0.651539	0.199063	0.343976	0.00272105	0.0688912	-0.0210715	0.145389	0.102155
2001	0.501266	0.15303	0.257491	-0.0355385	-0.0412705	-0.00981203	0.0886601	0.0283866
2002	0.412607	0.16044	0.146864	0.0217631	0.0853573	-0.0284132	0.0332681	-0.398279
2003	0.341117	0.160722	0.243009	0.152097	0.226418	-0.062966	0.0127049	-0.0104583
2004	0.346214	0.192561	0.397046	0.208215	0.19292	0.0148901	0.0744373	0.039387
2005	0.299461	0.224179	0.222251	0.0208197	0.0636242	0.0121505	0.0411397	-0.0232692
