# Supplementary material for: Smaller global and regional carbon emissions from gross land use change when considering sub-grid secondary land cohorts in a global dynamic vegetation model
Source: Copernicus journal article supplement (doi:10.5194/bg-2017-329), 2017-09-04
Supplement: Supplementary file 1 [file bg-2017-329-supplement.zip › data/Fig6.xls]

## Sheet: Forest loss from net
	South & Central America	South & Southeast Asia	Africa & Middle East	North America	China Region	Western Europe	Former Soviet Union	Pacific Developed Region
1800	0.000255222	0.00328451	0.00391111	0.000471804	0.0114097	0.00224273	0.00481227	0.000125407
1801	0.000255688	0.00328595	0.00394251	0.000471771	0.0115298	0.00224412	0.00481224	0.00012537
1802	0.000258142	0.00328582	0.00397625	0.000484972	0.0117149	0.00224938	0.0048122	0.00012539
1803	0.000259613	0.00337561	0.00404295	0.000507962	0.0120379	0.00225801	0.00481225	0.000132901
1804	0.000259931	0.00339207	0.00408271	0.000508548	0.0122823	0.00225808	0.00481216	0.000139571
1805	0.000260055	0.00339747	0.00417715	0.000508537	0.0130073	0.00225831	0.00481231	0.000142819
1806	0.000264483	0.00339787	0.00422475	0.000508544	0.0132583	0.00225877	0.0048122	0.000150691
1807	0.000271787	0.00339929	0.00429846	0.000508533	0.0134925	0.00225873	0.00481223	0.0001515
1808	0.000274879	0.00340089	0.00433932	0.000508536	0.0137519	0.00225875	0.00481263	0.00015218
1809	0.000276549	0.00340069	0.00444015	0.000521175	0.0141257	0.00225871	0.00481332	0.000155719
1810	0.000505544	0.00373589	0.00416979	0.000733472	0.00373368	0.00332437	0.00569126	0.000173857
1811	0.000513425	0.00373572	0.0042018	0.000748586	0.00376403	0.00333173	0.00571501	0.000173865
1812	0.000519515	0.00373594	0.00422928	0.000748586	0.003795	0.00333218	0.00571863	0.000173889
1813	0.000525599	0.0037359	0.00422922	0.000748565	0.00379989	0.0033358	0.00571873	0.000173835
1814	0.000545312	0.00373589	0.00422924	0.000752026	0.00383265	0.00333577	0.0057205	0.000173889
1815	0.000583527	0.00373685	0.00422929	0.000754633	0.00387583	0.00333577	0.00572184	0.000173881
1816	0.000616768	0.00373914	0.00423181	0.00079321	0.0039173	0.00333581	0.00576001	0.000177612
1817	0.000630288	0.00373943	0.00423467	0.000899701	0.00392441	0.00333579	0.00579597	0.000178593
1818	0.000638279	0.00374015	0.00423504	0.000912477	0.00392929	0.00335229	0.00579604	0.000178622
1819	0.000643805	0.00374017	0.0042584	0.000941681	0.00395207	0.00335261	0.00579609	0.000183232
1820	0.0011012	0.00391132	0.00745729	0.00123003	0.00928999	0.00320691	0.00626351	0.00010301
1821	0.00115945	0.00391136	0.00746722	0.00130892	0.00935672	0.00320697	0.00626623	0.000102993
1822	0.00153291	0.00391131	0.00748041	0.00131882	0.00938696	0.00320692	0.00626674	0.000102998
1823	0.0017416	0.0039117	0.00748093	0.00138418	0.0094091	0.00320693	0.00626667	0.000103017
1824	0.00182486	0.0039126	0.00748218	0.00140522	0.00944408	0.00320692	0.00626679	0.000102981
1825	0.00189578	0.00391703	0.00750747	0.00146026	0.00954141	0.00320695	0.00626668	0.000103006
1826	0.00193783	0.00392021	0.00754405	0.00146024	0.0096606	0.00320696	0.00631471	0.000103015
1827	0.00194735	0.00392226	0.00758876	0.00146025	0.00972986	0.00320694	0.00631598	0.000103018
1828	0.0019623	0.00392324	0.0076522	0.00151509	0.00974548	0.00320696	0.00631926	0.000103003
1829	0.00196674	0.00392322	0.00766423	0.00151953	0.00974592	0.00320698	0.00633524	0.000102998
1830	0.00126637	0.00443657	0.00517597	0.00292727	0.00658148	0.00336089	0.0173572	0.000106219
1831	0.00127393	0.00443673	0.00517586	0.00316814	0.00661533	0.00336819	0.0173633	0.000106222
1832	0.00128529	0.00443687	0.00520481	0.00332995	0.00663113	0.0033682	0.0173632	0.000106201
1833	0.00129127	0.00443931	0.00523768	0.00358686	0.00664674	0.00336821	0.0173632	0.000106242
1834	0.00129845	0.00444346	0.00523768	0.00368192	0.00664814	0.00336822	0.0173681	0.00010621
1835	0.00130879	0.00444364	0.00523925	0.00384505	0.00666467	0.00337325	0.0173745	0.000106251
1836	0.00131225	0.00445361	0.00524643	0.00407308	0.00668221	0.00339858	0.0173938	0.000168975
1837	0.00132147	0.004467	0.005254	0.00433898	0.00668414	0.00341255	0.0174611	0.000186322
1838	0.00134359	0.00447058	0.00525405	0.0045011	0.006705	0.00341295	0.0174625	0.000186275
1839	0.0013537	0.00448168	0.00525453	0.00465472	0.00673072	0.00341294	0.017468	0.000186327
1840	0.00159047	0.00433926	0.00533271	0.00607565	0.00556277	0.0035712	0.00821385	0.000151304
1841	0.00159801	0.00433918	0.00535608	0.00637907	0.00560089	0.00357115	0.00821626	0.000151329
1842	0.00159811	0.00436294	0.0053578	0.00660004	0.0056041	0.00357122	0.00822415	0.000151328
1843	0.00160918	0.00436888	0.00535793	0.00661189	0.00560556	0.00357117	0.00822741	0.000151301
1844	0.00162068	0.00438075	0.00535783	0.00664762	0.00560559	0.00357212	0.0082274	0.000151321
1845	0.00162115	0.00438296	0.00535798	0.00672121	0.00561874	0.00357774	0.00822819	0.000151323
1846	0.0016212	0.00439286	0.00535798	0.00676717	0.00566444	0.00357876	0.00823199	0.000151324
1847	0.00165116	0.0043943	0.00542733	0.00684671	0.00567045	0.00357878	0.00823441	0.000151324
1848	0.00167656	0.00439423	0.0054929	0.0068836	0.00567372	0.00357878	0.00823438	0.000151324
1849	0.00168885	0.00439493	0.0054966	0.00703621	0.00568588	0.00357899	0.00824149	0.000151313
1850	0.00266571	0.00164529	0.00551342	0.00809161	0.00109696	0.00200185	0.0172504	0.000268666
1851	0.00268066	0.00164622	0.0055416	0.00817712	0.00109694	0.00200451	0.0172609	0.000268661
1852	0.00268952	0.00165736	0.00560847	0.00838951	0.00109695	0.00200551	0.01727	0.000268659
1853	0.00271709	0.00166934	0.00560847	0.00864241	0.00112826	0.00200611	0.0172797	0.000268689
1854	0.00273751	0.00167486	0.00560892	0.00907544	0.0011331	0.00200603	0.0173221	0.000268669
1855	0.00275914	0.00170209	0.00561384	0.00946361	0.00114659	0.00200607	0.0173435	0.000268641
1856	0.00275955	0.00174666	0.00562303	0.0115897	0.00114761	0.00200608	0.0173456	0.000268694
1857	0.0027706	0.0017546	0.00563234	0.012513	0.00114764	0.00200656	0.0173476	0.000268629
1858	0.00281862	0.00175611	0.00563836	0.0128455	0.00114862	0.00200672	0.0173626	0.000268676
1859	0.00285428	0.00175969	0.00563904	0.0129947	0.00117584	0.00200675	0.0173883	0.00026866
1860	0.00159287	0.00170671	0.00521459	0.00376869	0.000777542	0.00244612	0.00996364	0.000331886
1861	0.00161293	0.00170752	0.00523524	0.00393489	0.000777557	0.00244617	0.00996377	0.000331881
1862	0.00162166	0.00171541	0.00524853	0.00401066	0.000777562	0.00244616	0.00998767	0.000331867
1863	0.00163893	0.00171649	0.00533277	0.00405856	0.000777538	0.00244625	0.0100021	0.00033188
1864	0.00167088	0.00172721	0.00533933	0.00413321	0.000777561	0.00244708	0.0100022	0.000331874
1865	0.00167586	0.00173925	0.0053492	0.00425366	0.000777557	0.00244713	0.0100024	0.000331889
1866	0.00178236	0.00174221	0.00534937	0.00452738	0.000777545	0.00244714	0.0100025	0.000331892
1867	0.00183745	0.0017621	0.00535186	0.0046152	0.00077757	0.00246948	0.0100024	0.000331873
1868	0.0018775	0.00177075	0.00535436	0.00468825	0.000777553	0.00247169	0.0100036	0.000331872
1869	0.00190939	0.00177484	0.00535864	0.00473218	0.000777547	0.00247171	0.0100061	0.000338437
1870	0.00253346	0.00209613	0.00607199	0.0164719	0.00156759	0.0023222	0.0207916	0.000612454
1871	0.00257963	0.00210581	0.00608179	0.0167973	0.00156752	0.00232218	0.0208154	0.000617977
1872	0.00260651	0.0021115	0.00617798	0.0177843	0.00156761	0.00232219	0.0208326	0.000651746
1873	0.00265776	0.00214293	0.00617843	0.0184918	0.00156757	0.00232221	0.0209096	0.000651758
1874	0.00269227	0.00214619	0.00622033	0.0197721	0.00156757	0.00232217	0.0209823	0.000651769
1875	0.00272051	0.0021511	0.00625028	0.0214092	0.00156757	0.00232219	0.0210363	0.00065176
1876	0.00274547	0.00215972	0.00640897	0.0223354	0.00156756	0.00232218	0.0210429	0.00065174
1877	0.00276152	0.00216174	0.00653216	0.0232386	0.00156758	0.00232216	0.0210497	0.000651795
1878	0.00284112	0.00216506	0.0066422	0.0236944	0.00158475	0.00232218	0.0210605	0.000651757
1879	0.00291878	0.00217174	0.00680291	0.0240425	0.00158893	0.00232223	0.0210671	0.000651759
1880	0.00416572	0.00275807	0.00650016	0.0106099	0.00493079	0.00200252	0.0219851	0.00082365
1881	0.00423666	0.00276901	0.00667567	0.0111235	0.00493087	0.002004	0.0220823	0.000827501
1882	0.00452684	0.00280556	0.00674406	0.0114288	0.00493115	0.00200399	0.0222292	0.00082754
1883	0.0046118	0.00280649	0.00680317	0.011688	0.00493191	0.00200399	0.0223629	0.000827508
1884	0.00485007	0.0028123	0.00685429	0.0118136	0.00504605	0.002004	0.0224596	0.000827554
1885	0.00508974	0.00281315	0.00688183	0.012169	0.00506525	0.00200401	0.0224876	0.000827532
1886	0.00586366	0.0028255	0.00692084	0.0125512	0.00508648	0.00200432	0.0225298	0.000836245
1887	0.00720731	0.00283931	0.00692905	0.0126389	0.0050877	0.00200943	0.0225404	0.000870144
1888	0.00751624	0.00288758	0.00697575	0.0128397	0.00508944	0.00200949	0.0225539	0.000870148
1889	0.00762418	0.00288762	0.00700385	0.0133035	0.00509493	0.00200946	0.0225565	0.000870124
1890	0.00454423	0.00294056	0.00760519	0.0284713	0.00702762	0.00305118	0.0195264	0.00129383
1891	0.0045822	0.00294417	0.00762791	0.0299896	0.00702764	0.00305119	0.0195905	0.00129383
1892	0.00473055	0.00294769	0.00771691	0.0314146	0.007034	0.00305124	0.0196059	0.00129384
1893	0.00480406	0.00295681	0.00785637	0.0319097	0.00707307	0.00305143	0.01961	0.00131856
1894	0.00489046	0.00296116	0.00786552	0.0329046	0.00716045	0.00305142	0.0196774	0.00139057
1895	0.00492334	0.00296527	0.00787872	0.0335934	0.00722575	0.00305139	0.0197355	0.00141223
1896	0.00496555	0.00296883	0.00788298	0.034125	0.00726441	0.00305142	0.0197581	0.0014218
1897	0.00506815	0.00301961	0.00795095	0.0351172	0.00728083	0.00305172	0.0197601	0.00143261
1898	0.00514406	0.00302638	0.00821876	0.0370754	0.00741488	0.00305179	0.0198886	0.00143261
1899	0.00522962	0.0030616	0.00837521	0.0378785	0.00770047	0.00305173	0.0199174	0.00143262
1900	0.00785783	0.00462108	0.014287	0.00994054	0.0088318	0.00324223	0.0395111	0.00178729
1901	0.00816289	0.00466128	0.0145115	0.0104772	0.00885917	0.00324398	0.0395928	0.00187497
1902	0.00844448	0.00466483	0.0148611	0.0109671	0.00886219	0.00324399	0.0397464	0.0020855
1903	0.00863072	0.00467702	0.0148647	0.0110332	0.0088622	0.003244	0.0398713	0.00210885
1904	0.0092894	0.00468719	0.0151297	0.0111359	0.00887145	0.003244	0.0399021	0.00215333
1905	0.00978277	0.00469546	0.0154021	0.0114679	0.00922315	0.00324399	0.0399239	0.00215335
1906	0.00986869	0.00469588	0.015413	0.0117599	0.0094223	0.003244	0.0400215	0.0021838
1907	0.00990126	0.00472071	0.015425	0.0118924	0.00959845	0.00324402	0.0401803	0.00227184
1908	0.00996317	0.00473194	0.0154778	0.0121721	0.00982978	0.00324397	0.0402472	0.00228136
1909	0.0100932	0.00475117	0.0157805	0.0127408	0.0104703	0.00324499	0.0403437	0.00228483
1910	0.0130734	0.00469544	0.0124391	0.0172619	0.00793706	0.00201247	0.00485145	0.00247647
1911	0.0134367	0.00471374	0.0126922	0.0173136	0.00804398	0.00201241	0.00507813	0.0024768
1912	0.0137189	0.00472552	0.0129355	0.0174498	0.0080977	0.00201249	0.0051612	0.00248867
1913	0.01405	0.00474549	0.0132115	0.0177764	0.00812265	0.00201244	0.00518002	0.00259464
1914	0.014228	0.00476159	0.0132135	0.0180028	0.00815838	0.00201247	0.00521765	0.00259464
1915	0.0143247	0.00477766	0.0132196	0.0181288	0.00816876	0.0020124	0.0056544	0.00267353
1916	0.0144971	0.00478612	0.0132375	0.0183061	0.00818315	0.00201628	0.00577734	0.00275933
1917	0.0146642	0.00481374	0.0132378	0.0184739	0.00819111	0.00206722	0.0060566	0.00281025
1918	0.0152006	0.00485162	0.0132416	0.018688	0.00821575	0.00206723	0.00630632	0.002834
1919	0.0155437	0.00485786	0.0132894	0.0189727	0.00836304	0.0020672	0.00633684	0.00287433
1920	0.0185041	0.00640812	0.0172375	0.0186091	0.00318133	0.00318195	0.0109911	0.00331962
1921	0.0189256	0.00645215	0.0172819	0.0190611	0.00318306	0.00318193	0.0110734	0.00344322
1922	0.0192259	0.00647023	0.0172939	0.0197701	0.00318576	0.003182	0.0111378	0.0036099
1923	0.0193801	0.00647463	0.0174647	0.0198446	0.00318579	0.00318214	0.0111414	0.0036099
1924	0.0197653	0.00647765	0.0175793	0.0198763	0.00318573	0.00318217	0.0111445	0.00360994
1925	0.0198215	0.00648157	0.0175857	0.0200195	0.00318575	0.00318216	0.0111448	0.00365031
1926	0.0199228	0.00648151	0.0176191	0.0201929	0.00318579	0.00318215	0.0111683	0.00379777
1927	0.0203469	0.00648151	0.0177237	0.0202744	0.00318752	0.00318215	0.0112217	0.00397982
1928	0.0206364	0.00648187	0.0178727	0.0204068	0.0031883	0.00318217	0.0112434	0.00445832
1929	0.0207212	0.00648399	0.0180281	0.0204404	0.00318947	0.00318221	0.0113732	0.00476218
1930	0.0244554	0.00673155	0.0300402	0.0204723	0.00381961	0.00256368	0.0354521	0.00490325
1931	0.0247067	0.00673248	0.0301379	0.0204738	0.00382551	0.00256373	0.0355746	0.00506261
1932	0.0248104	0.00680342	0.0307035	0.0205827	0.00391412	0.00256369	0.0356756	0.00531818
1933	0.0252349	0.0068223	0.0309682	0.0206662	0.00398922	0.00256371	0.0357433	0.00609668
1934	0.0258494	0.00682708	0.0312243	0.0206666	0.00401338	0.00256369	0.036247	0.00670187
1935	0.0262079	0.00682993	0.0312935	0.0206749	0.00402132	0.00256372	0.0386081	0.0069736
1936	0.0265645	0.00682992	0.0314275	0.0206879	0.00402132	0.00256859	0.0392823	0.00731499
1937	0.0268538	0.0068298	0.0317143	0.0206908	0.00402903	0.00260384	0.0400956	0.00812129
1938	0.0269224	0.00683152	0.0318999	0.020703	0.00405356	0.00260381	0.0408477	0.00971712
1939	0.0270295	0.00683233	0.0320753	0.020709	0.00405767	0.00260381	0.0414247	0.0105459
1940	0.0222547	0.0102065	0.0668994	0.0122457	0.00255992	0.00110887	0.000484738	0.014406
1941	0.0223808	0.0102065	0.0671612	0.0122674	0.00255987	0.0011089	0.000484747	0.0154163
1942	0.0225006	0.010208	0.0675587	0.013061	0.0025599	0.00110886	0.000484751	0.0167109
1943	0.0228404	0.0102103	0.0679865	0.0132175	0.00255987	0.00110887	0.000484756	0.0175683
1944	0.0231899	0.0102896	0.068699	0.0132952	0.00255989	0.00110887	0.000484753	0.0186643
1945	0.0234577	0.0103043	0.0693807	0.0132988	0.00255991	0.00110887	0.000484725	0.0199009
1946	0.0238024	0.0103195	0.0694929	0.0133075	0.00255989	0.00110887	0.000484765	0.021066
1947	0.0241078	0.0103312	0.070022	0.0133075	0.0025599	0.00110888	0.000484735	0.0220579
1948	0.0242289	0.0103359	0.0702785	0.01331	0.00255986	0.00110887	0.000484751	0.0236201
1949	0.0244605	0.0103474	0.0709245	0.0133854	0.00255995	0.00110888	0.00048474	0.0241958
1950	0.0394168	0.0207394	0.0706865	0.0100608	0.0158304	0.00244557	0.0181532	0.0291986
1951	0.0421581	0.0207688	0.0716646	0.0101744	0.0160073	0.00244559	0.0182748	0.0325859
1952	0.0442257	0.0208683	0.0731582	0.0102822	0.01642	0.00244567	0.0186108	0.034799
1953	0.0460381	0.0208793	0.0747463	0.0103008	0.0166497	0.00244564	0.0186496	0.0373301
1954	0.0478722	0.0210979	0.0764121	0.010351	0.0167865	0.00244566	0.018804	0.0384712
1955	0.0503134	0.0212073	0.0772544	0.0103646	0.0169599	0.00244564	0.0190311	0.0393225
1956	0.0514643	0.0213269	0.0775669	0.0103737	0.0170811	0.00244564	0.0198029	0.0403872
1957	0.0518567	0.0216245	0.0779046	0.0103783	0.0173627	0.00244566	0.0205085	0.0412053
1958	0.0524969	0.0217272	0.0783404	0.010426	0.0182824	0.00244564	0.0209482	0.0424143
1959	0.0531472	0.0217383	0.0803497	0.010499	0.0197841	0.00244567	0.0213833	0.0425906
1960	0.0269356	0.00540526	0.00810012	0.00196317	0.0124544	0.000390244	0.00294133	0.00326026
1961	0.0270387	0.00540643	0.00834634	0.00196328	0.0126508	0.000390229	0.00298386	0.00326263
1962	0.0271759	0.0054075	0.00889651	0.00196325	0.0127611	0.000390258	0.00302788	0.00330057
1963	0.0272555	0.00540755	0.00900527	0.00196322	0.0129267	0.000390245	0.00302799	0.00331254
1964	0.0275177	0.0054076	0.00912722	0.00196325	0.013003	0.000390241	0.00306796	0.00331274
1965	0.0276542	0.0054075	0.00915986	0.00196321	0.013145	0.000390248	0.00306855	0.0033198
1966	0.0276955	0.00540768	0.00918902	0.0019632	0.0131523	0.000390245	0.00306852	0.00333173
1967	0.0277278	0.00540786	0.00930054	0.00196328	0.0131674	0.000390259	0.00306859	0.00338161
1968	0.0277555	0.00540797	0.00932328	0.00196321	0.0133403	0.000390259	0.00306889	0.00340717
1969	0.0279196	0.00540841	0.0093258	0.00196324	0.0133808	0.000390213	0.00306998	0.00340745
1970	0.0209029	0.00551975	0.00688454	0.00123398	0.0204479	0.000131074	0.00252642	0.000675895
1971	0.0215546	0.00552879	0.00693443	0.00123477	0.0208056	0.000131086	0.00253742	0.000675913
1972	0.0217435	0.0055493	0.00696652	0.00123476	0.0216004	0.000131082	0.00253739	0.000675879
1973	0.0217818	0.00555232	0.00707438	0.00123489	0.0216995	0.000131053	0.00253743	0.000675838
1974	0.0218724	0.00556361	0.00723102	0.00123504	0.0218361	0.000131059	0.00253745	0.000687089
1975	0.0219563	0.0055637	0.00723474	0.00123567	0.0223113	0.000131078	0.00253739	0.000695116
1976	0.0219926	0.00556378	0.00727868	0.00123624	0.0226964	0.000131076	0.00253749	0.000695452
1977	0.0220746	0.00556363	0.00758792	0.00123653	0.0234529	0.000131058	0.0025374	0.000695872
1978	0.0221522	0.00556412	0.00770868	0.00123872	0.0237557	0.000131078	0.00253739	0.000695901
1979	0.0222147	0.00556413	0.00781586	0.00124207	0.0239295	0.000131031	0.00253742	0.0006963
1980	0.0202902	0.00520733	0.0169733	0.00206364	0.0350077	2.91413e-05	0.00175304	0.000190269
1981	0.0204112	0.00522432	0.0170602	0.0020636	0.036276	2.91383e-05	0.00175297	0.000194201
1982	0.0204457	0.00524266	0.0172656	0.0020636	0.0368471	2.91322e-05	0.00175342	0.000196409
1983	0.0206251	0.00524277	0.0174026	0.0020637	0.0377566	2.91323e-05	0.00175502	0.000196718
1984	0.0206545	0.00524268	0.0175013	0.00206378	0.0383764	2.91373e-05	0.00178349	0.000196703
1985	0.0206703	0.00524268	0.0175152	0.0020643	0.0389658	2.91424e-05	0.00179247	0.000196745
1986	0.0206901	0.00524787	0.0175664	0.00206602	0.0394193	2.91313e-05	0.00179244	0.000196721
1987	0.0207078	0.00526205	0.0175946	0.0020663	0.0397409	2.91249e-05	0.0017924	0.000196806
1988	0.0207234	0.00526909	0.0176975	0.00206754	0.0410786	2.9134e-05	0.00179251	0.000196898
1989	0.0207512	0.0052841	0.0198978	0.00206969	0.0423534	2.91448e-05	0.00179244	0.000196858
1990	0.0156772	0.00343207	0.0185747	0.000130472	0.00155923	8.84316e-05	0.00765722	2.73993e-05
1991	0.0156797	0.0034321	0.0186077	0.000130454	0.00155923	8.84407e-05	0.00805016	2.74224e-05
1992	0.0156918	0.00345331	0.0189417	0.000130458	0.00160162	8.84293e-05	0.00815241	2.74016e-05
1993	0.0157194	0.00345593	0.0191335	0.000131193	0.00171502	8.84417e-05	0.00839338	2.74219e-05
1994	0.0157681	0.00345599	0.0192787	0.000131573	0.00180768	8.84252e-05	0.00868442	2.73537e-05
1995	0.0157775	0.00345596	0.0193284	0.00013158	0.00197903	8.84498e-05	0.00904513	2.74281e-05
1996	0.015778	0.00345595	0.0193851	0.000131617	0.00203656	8.84216e-05	0.00945304	2.73878e-05
1997	0.0157787	0.00345599	0.0196119	0.000131761	0.00228518	8.84373e-05	0.0100622	2.73904e-05
1998	0.0157798	0.00345596	0.0197776	0.000132099	0.00250876	8.84526e-05	0.0103194	2.7425e-05
1999	0.0157896	0.00345601	0.0201654	0.000132326	0.00288327	8.84293e-05	0.0105114	2.7373e-05
2000	0.011267	0.0157106	0.030387	0.00234606	9.40293e-05	0.00238204	0.00270397	0.00231973
2001	0.00491587	0.00366036	0.0304961	0.000388483	0.000246939	0.00263064	0.00290176	2.48238e-08
2002	0.0180824	0.0110938	0.037272	0.00609655	7.93495e-06	0.000907002	0.00151161	1.29654e-05
2003	0.021077	0.0102094	0.0256575	0.00271732	0.0272967	0.00547164	0.00112948	0.00128563
2004	0.0103496	0.00967248	0.036354	0.00522888	0.000109381	0.0033712	0.00223722	0.0109332

## Sheet: Forest gain from net
	South & Central America	South & Southeast Asia	Africa & Middle East	North America	China Region	Western Europe	Former Soviet Union	Pacific Developed Region
1800	0.000573449	8.46858e-06	7.18962e-05	7.65373e-08	4.69703e-06	0.000844805	4.65708e-05	3.08964e-05
1801	0.000573425	8.45629e-06	7.17817e-05	7.40062e-08	4.68502e-06	0.000844813	4.65287e-05	3.08799e-05
1802	0.000573475	8.45327e-06	7.19527e-05	6.63524e-08	4.69463e-06	0.000844807	4.65643e-05	3.08504e-05
1803	0.000573444	8.45326e-06	7.18521e-05	7.90684e-08	4.70663e-06	0.000844793	4.65719e-05	3.088e-05
1804	0.000573465	8.4487e-06	7.20525e-05	7.65976e-08	4.69222e-06	0.000844811	4.65179e-05	3.08871e-05
1805	0.000573442	8.44865e-06	7.20507e-05	7.65373e-08	4.68742e-06	0.000844812	4.65634e-05	3.08523e-05
1806	0.000573422	8.46857e-06	7.21011e-05	6.88836e-08	4.69222e-06	0.000844814	4.65335e-05	3.08822e-05
1807	0.000573476	8.45327e-06	7.21791e-05	7.1475e-08	4.69222e-06	0.000844801	4.65388e-05	3.0869e-05
1808	0.000573461	8.45481e-06	7.22576e-05	8.17202e-08	4.69463e-06	0.00084481	4.6552e-05	3.08769e-05
1809	0.000573421	8.44864e-06	7.22572e-05	6.88233e-08	4.69222e-06	0.000844788	4.65508e-05	3.08884e-05
1810	0.000463515	8.07029e-06	6.61994e-05	2.23038e-07	5.92651e-05	0.000345697	4.4621e-05	2.55069e-05
1811	0.000463567	8.05507e-06	6.63264e-05	2.23606e-07	5.92459e-05	0.0003457	4.46244e-05	2.55236e-05
1812	0.000463601	8.06107e-06	6.62716e-05	2.28541e-07	5.92507e-05	0.00034569	4.46218e-05	2.5501e-05
1813	0.000463564	8.06873e-06	6.62307e-05	2.18101e-07	5.92507e-05	0.000345704	4.46165e-05	2.54916e-05
1814	0.000463563	8.06118e-06	6.63299e-05	2.19932e-07	5.92507e-05	0.000345705	4.46173e-05	2.54925e-05
1815	0.000463532	8.06582e-06	6.63476e-05	2.87534e-07	5.92387e-05	0.000345702	4.46179e-05	2.55009e-05
1816	0.000463566	8.0642e-06	6.64381e-05	2.20778e-07	5.92651e-05	0.000345701	4.46232e-05	2.55109e-05
1817	0.000463573	8.12754e-06	6.63589e-05	2.11808e-07	5.92483e-05	0.000345704	4.46158e-05	2.55003e-05
1818	0.00046352	8.25558e-06	6.64136e-05	2.40629e-07	5.92531e-05	0.000345694	4.46307e-05	2.55062e-05
1819	0.000463595	8.23873e-06	6.63954e-05	2.00912e-07	5.92507e-05	0.000345709	4.46187e-05	2.54956e-05
1820	6.31029e-08	2.48312e-06	0.000322763	3.80543e-07	5.06241e-05	1.89898e-06	3.78129e-05	5.042e-05
1821	6.77202e-08	2.48952e-06	0.000322608	4.04669e-07	5.06089e-05	1.89241e-06	3.78498e-05	5.04319e-05
1822	6.4642e-08	2.49556e-06	0.000322724	3.66287e-07	5.06216e-05	1.89509e-06	3.78447e-05	5.04077e-05
1823	6.77202e-08	2.48093e-06	0.00032269	3.63761e-07	5.06347e-05	1.90145e-06	3.82202e-05	5.04555e-05
1824	6.77202e-08	2.48433e-06	0.000322682	3.71064e-07	5.06163e-05	1.8922e-06	3.86701e-05	5.04068e-05
1825	6.15638e-08	2.48951e-06	0.000322773	3.59423e-07	5.06293e-05	1.88296e-06	3.86273e-05	5.0406e-05
1826	6.31029e-08	2.47775e-06	0.000322649	3.81998e-07	5.06322e-05	1.90166e-06	3.866e-05	5.04257e-05
1827	7.07984e-08	2.48982e-06	0.000322744	4.215e-07	5.06167e-05	1.90187e-06	3.86664e-05	5.04278e-05
1828	6.31029e-08	2.47481e-06	0.000322732	3.66683e-07	5.06161e-05	1.88953e-06	3.86469e-05	5.04124e-05
1829	6.61811e-08	2.48755e-06	0.000322735	3.53308e-07	5.06165e-05	4.67766e-06	3.86563e-05	5.04512e-05
1830	5.39926e-06	3.15205e-06	0.000368121	0	0.000106503	4.46793e-05	4.166e-05	8.7178e-05
1831	5.39623e-06	3.14898e-06	0.000368096	0	0.000106504	4.46774e-05	4.26546e-05	8.71669e-05
1832	5.39016e-06	3.16057e-06	0.000368153	0	0.000106493	4.46702e-05	4.56262e-05	8.71776e-05
1833	5.40386e-06	3.1544e-06	0.000368056	0	0.000106474	4.46763e-05	4.68906e-05	8.71877e-05
1834	5.39481e-06	3.16267e-06	0.000368162	0	0.000106517	4.46776e-05	4.68884e-05	8.71885e-05
1835	5.39931e-06	3.14468e-06	0.000368231	0	0.00010651	4.46649e-05	4.68717e-05	8.7168e-05
1836	5.38399e-06	3.16883e-06	0.000368215	0	0.000106462	4.46853e-05	4.68855e-05	8.71828e-05
1837	5.39936e-06	3.13884e-06	0.000368136	0	0.000106518	4.46654e-05	4.68645e-05	8.71935e-05
1838	5.39612e-06	3.17622e-06	0.000368118	0	0.000106487	4.46654e-05	4.69061e-05	8.71689e-05
1839	5.40548e-06	3.15801e-06	0.000368222	0	0.000106489	4.46858e-05	4.68845e-05	8.71687e-05
1840	1.25877e-07	7.62574e-05	0.000151858	3.76818e-05	0.00011971	0.000313134	4.80098e-05	0.000126854
1841	1.45649e-07	7.62371e-05	0.000151788	3.76719e-05	0.00011966	0.000313124	4.80605e-05	0.000126922
1842	1.47137e-07	7.62775e-05	0.00015177	3.76899e-05	0.000119707	0.000313124	4.80194e-05	0.000126899
1843	1.41099e-07	7.62491e-05	0.00015181	3.77069e-05	0.000119655	0.000313136	4.80294e-05	0.000126907
1844	1.25877e-07	7.62417e-05	0.000151777	3.76819e-05	0.000119723	0.000313139	4.80466e-05	0.000126911
1845	1.42625e-07	7.62558e-05	0.000151794	3.76602e-05	0.000119693	0.000313137	4.80675e-05	0.000126898
1846	1.50161e-07	7.62606e-05	0.000151777	3.7689e-05	0.000119706	0.000313122	4.80292e-05	0.000126881
1847	1.39592e-07	7.62554e-05	0.000151825	3.77001e-05	0.000119703	0.000313151	4.80299e-05	0.000126902
1848	1.3346e-07	7.62607e-05	0.000151793	3.76818e-05	0.000119643	0.000313122	4.80267e-05	0.000126909
1849	1.42606e-07	7.62518e-05	0.000151822	3.7709e-05	0.000119735	0.000313143	4.80503e-05	0.000126884
1850	1.26189e-06	0.000220612	0.000194181	9.41238e-09	0.00188612	0.00071612	6.06856e-05	7.1765e-05
1851	1.24915e-06	0.000220604	0.000194169	4.98303e-09	0.00188438	0.000716118	6.22745e-05	7.16817e-05
1852	1.24927e-06	0.000220631	0.000194177	0	0.00188093	0.000716171	6.22742e-05	7.17414e-05
1853	1.2727e-06	0.00022061	0.000194155	1.55028e-08	0.00188093	0.000716121	6.22554e-05	7.16989e-05
1854	1.23561e-06	0.000220611	0.000194189	2.10394e-08	0.00188092	0.000696434	6.22479e-05	7.17249e-05
1855	1.26612e-06	0.000220626	0.000194176	0	0.00188085	0.000691123	6.22629e-05	7.17144e-05
1856	1.25378e-06	0.000220591	0.000194178	0	0.00189359	0.000691091	6.22686e-05	7.17181e-05
1857	1.26171e-06	0.000220618	0.000194178	2.04858e-08	0.00191955	0.000693944	6.22559e-05	7.17355e-05
1858	1.24329e-06	0.000220591	0.000194131	0	0.00192111	0.000695681	6.22504e-05	7.1721e-05
1859	1.27084e-06	0.000220639	0.00019431	0	0.00192122	0.000695632	6.28855e-05	7.16951e-05
1860	0.00112145	0.00048506	7.00486e-05	0.00455749	0.0178416	0.000484327	0.000414232	8.23803e-05
1861	0.00112147	0.000485058	7.00328e-05	0.00455752	0.0179239	0.00048432	0.000414301	8.23504e-05
1862	0.00112148	0.000485124	7.00315e-05	0.0045575	0.0181664	0.000484283	0.000414256	8.23711e-05
1863	0.00112156	0.00048504	7.00237e-05	0.00455758	0.0181753	0.000484298	0.000414251	8.23906e-05
1864	0.00112148	0.000485123	7.00498e-05	0.00455756	0.01827	0.00048434	0.000414244	8.23434e-05
1865	0.00112146	0.000485071	7.00506e-05	0.00455749	0.0182895	0.0004843	0.000414275	8.23709e-05
1866	0.00112146	0.000485071	7.00084e-05	0.00455748	0.0183365	0.000484296	0.000414266	8.23631e-05
1867	0.00112153	0.000485074	7.00213e-05	0.00455749	0.0183926	0.000484318	0.000415077	8.23734e-05
1868	0.00112148	0.000485104	7.00417e-05	0.00455753	0.0186275	0.0004843	0.00041554	8.23487e-05
1869	0.00112148	0.000485103	7.01429e-05	0.0045576	0.0187329	0.000484306	0.000416267	8.23875e-05
1870	0.00110648	9.16921e-05	2.65536e-05	2.69086e-08	0.00194002	0.000166761	6.0044e-06	0.000103518
1871	0.00110643	9.16738e-05	2.65298e-05	2.49151e-08	0.00194002	0.000166749	6.00343e-06	0.000103602
1872	0.00110649	9.16914e-05	2.65749e-05	2.60225e-08	0.00193998	0.00016673	6.00097e-06	0.000103572
1873	0.00110644	9.17041e-05	2.65839e-05	1.49491e-08	0.00194007	0.000166772	5.9959e-06	0.000103539
1874	0.00110647	9.16636e-05	2.65827e-05	3.59885e-08	0.00194001	0.000166743	6.00447e-06	0.000103592
1875	0.00110645	9.33255e-05	2.65682e-05	1.55528e-08	0.00194006	0.000166747	6.00097e-06	0.000103526
1876	0.00110649	9.34787e-05	2.65495e-05	3.59885e-08	0.00194002	0.000166731	5.9996e-06	0.000103579
1877	0.0011064	9.34324e-05	2.65707e-05	1.49491e-08	0.00194	0.000166793	6.00447e-06	0.000103576
1878	0.00110653	9.34826e-05	2.65551e-05	3.59885e-08	0.00194003	0.000166731	6.00213e-06	0.000103567
1879	0.00110645	9.34411e-05	2.65898e-05	1.49491e-08	0.00194349	0.000166728	5.9972e-06	0.000103554
1880	1.04316e-05	0.000547998	2.39424e-06	0.00102519	0.000924593	0.000605627	1.20876e-06	0.000114222
1881	1.04038e-05	0.000547974	2.45011e-06	0.00102529	0.000924577	0.000605621	1.20593e-06	0.000114205
1882	1.04083e-05	0.000548058	2.50755e-06	0.00102523	0.000924581	0.000650867	1.20911e-06	0.000114214
1883	1.04253e-05	0.000547951	2.52877e-06	0.00102524	0.000924619	0.000683062	1.20382e-06	0.000114224
1884	1.04037e-05	0.000547991	2.52579e-06	0.00102521	0.000924607	0.000683003	1.20876e-06	0.000114264
1885	1.04191e-05	0.000547988	2.56322e-06	0.00102524	0.000924547	0.000758064	1.21071e-06	0.000114172
1886	1.04239e-05	0.000548008	2.49341e-06	0.00102521	0.000924617	0.00076694	1.20275e-06	0.000114223
1887	1.04052e-05	0.000548005	2.53631e-06	0.00102522	0.000924576	0.000766964	1.20752e-06	0.000114209
1888	1.04299e-05	0.00054796	2.522e-06	0.00102525	0.000924589	0.000750087	1.20788e-06	0.000114234
1889	1.04052e-05	0.000547993	2.54784e-06	0.00102524	0.000924585	0.000749555	1.20876e-06	0.000114189
1890	0.00137444	0.000161669	5.06273e-05	0.000837652	0.000211364	0.000578617	9.04046e-06	0.000126944
1891	0.00137439	0.000161706	5.06334e-05	0.000837633	0.000211448	0.000596404	9.05423e-06	0.000126921
1892	0.00137452	0.000161648	5.06752e-05	0.00083763	0.000212151	0.000599812	9.03975e-06	0.000126936
1893	0.00137442	0.000161651	5.06614e-05	0.000837648	0.000212173	0.000692158	9.04205e-06	0.000126904
1894	0.00137442	0.000161677	5.06655e-05	0.00083768	0.000212179	0.000692137	9.04221e-06	0.000126915
1895	0.00137443	0.000161674	5.06382e-05	0.000837667	0.000212256	0.000692129	9.04524e-06	0.000126946
1896	0.0013744	0.000161652	5.06346e-05	0.000837647	0.000212387	0.000692151	9.04381e-06	0.000126929
1897	0.00137444	0.000161675	5.07019e-05	0.000837619	0.000212346	0.000692136	9.04293e-06	0.000126917
1898	0.00137447	0.000161668	5.06666e-05	0.00083763	0.000212619	0.000692139	9.05212e-06	0.000126933
1899	0.00137443	0.000161676	5.07631e-05	0.000837713	0.000212672	0.000692147	9.1276e-06	0.000126937
1900	0.000368461	0.00138673	0.00344441	0.0115527	0.00190289	0.00242513	0.00187272	0.000288067
1901	0.000368473	0.00138676	0.0034444	0.013106	0.00191557	0.00227947	0.00195499	0.000288119
1902	0.00036846	0.00138674	0.0034446	0.0144031	0.00206424	0.00218748	0.00207526	0.000288081
1903	0.00036845	0.00138676	0.00369006	0.0151258	0.00206423	0.00218746	0.00292956	0.000288101
1904	0.000368469	0.00138676	0.00413733	0.0151258	0.00206433	0.00224209	0.00306297	0.000288095
1905	0.000368458	0.00138673	0.00417662	0.0154621	0.00207339	0.00224455	0.00315925	0.000288101
1906	0.000368466	0.00138675	0.00418216	0.0157697	0.00215648	0.00225089	0.00318659	0.000288114
1907	0.000368447	0.00105617	0.00419467	0.016416	0.00207494	0.00233938	0.00314371	0.000288089
1908	0.000368477	0.000877073	0.00479432	0.0170018	0.00205705	0.00233766	0.00314546	0.000288108
1909	0.000368472	0.000877076	0.00692525	0.0170018	0.00203397	0.00176487	0.0028468	0.000288114
1910	0.00147938	2.15241e-05	0.00033117	0.000418351	0.00120886	0.00263167	0.0304511	1.65066e-07
1911	0.0014794	2.15141e-05	0.000331168	0.000418389	0.00121617	0.00263166	0.0305521	1.35968e-07
1912	0.00147946	2.15212e-05	0.000331168	0.00041836	0.00109338	0.00272004	0.0306003	1.52828e-07
1913	0.0014794	2.1518e-05	0.000331171	0.00041835	0.00107984	0.00298177	0.0305822	1.68095e-07
1914	0.00147949	2.15097e-05	0.000331265	0.000418349	0.00109051	0.0029571	0.030508	1.42131e-07
1915	0.00147937	2.15296e-05	0.000331371	0.000418381	0.00109048	0.00286075	0.0305529	1.49739e-07
1916	0.00147945	2.15166e-05	0.000331323	0.000418365	0.00106064	0.00316674	0.0305783	1.6354e-07
1917	0.00147949	2.15055e-05	0.000331371	0.00041832	0.00106127	0.00322406	0.0305838	1.58924e-07
1918	0.0014794	2.1517e-05	0.000331327	0.000418407	0.00105582	0.00323982	0.0305857	1.39027e-07
1919	0.0014794	2.15282e-05	0.000331378	0.000418341	0.00106355	0.00326184	0.0305877	1.68118e-07
1920	6.43668e-07	0.000180791	0.000159862	0.00517032	0.00190979	0.000493805	0.000223672	3.19151e-06
1921	6.20601e-07	0.000180805	0.000160014	0.00521033	0.0019849	0.000493804	0.000223646	3.17152e-06
1922	6.43588e-07	0.000180795	0.000160051	0.00558385	0.00198645	0.000493896	0.00022367	3.23134e-06
1923	6.406e-07	0.000180789	0.000160061	0.00575474	0.00198642	0.000493783	0.000223655	3.19151e-06
1924	6.51338e-07	0.000180839	0.000160027	0.00602692	0.00198647	0.00055887	0.000223664	3.20989e-06
1925	6.20618e-07	0.000180804	0.00016012	0.00604277	0.00198643	0.000919837	0.000223674	3.19757e-06
1926	6.40513e-07	0.000180778	0.000160001	0.00604269	0.00198646	0.00119936	0.000223797	3.193e-06
1927	6.36076e-07	0.000180809	0.000160073	0.00604277	0.00198644	0.00119993	0.000223848	3.20074e-06
1928	6.37458e-07	0.000180795	0.000160111	0.00604269	0.00198278	0.00120006	0.000223886	3.21596e-06
1929	6.37581e-07	0.000180813	0.0001606	0.00604275	0.00200857	0.00119998	0.000226812	3.16847e-06
1930	0.000110454	0.000408498	0.000317568	0.000683618	0.00460407	0.00227274	0.000561225	1.71722e-05
1931	0.000110483	0.000408522	0.000317564	0.000683743	0.00468602	0.00238847	0.000561229	1.71344e-05
1932	0.000110437	0.00040853	0.000317518	0.000683661	0.00491809	0.00238846	0.000561224	1.71708e-05
1933	0.000110478	0.000408499	0.0003175	0.000683723	0.00492026	0.00238844	0.000584791	1.71576e-05
1934	0.000110459	0.000408532	0.000317591	0.000683634	0.00492049	0.00238841	0.000605016	1.71576e-05
1935	0.00011046	0.000408503	0.000317552	0.000683684	0.00492038	0.00238847	0.000605334	1.71571e-05
1936	0.000110459	0.000408505	0.0003176	0.000683639	0.00493962	0.00238871	0.000605494	1.71745e-05
1937	0.00011046	0.000408541	0.000317564	0.000683694	0.00498343	0.00238915	0.000605544	1.71855e-05
1938	0.000110466	0.00040851	0.000317588	0.000683677	0.00499113	0.00238922	0.000605501	1.71164e-05
1939	0.000110451	0.000408516	0.000339616	0.000683677	0.00510943	0.00239737	0.000605515	1.71728e-05
1940	0.00372402	0.0010277	0.00180711	0.00131603	0.00755482	0.00351553	0.0872927	2.62801e-05
1941	0.00372404	0.00102774	0.00180711	0.00131605	0.00745302	0.00351565	0.0849322	2.62624e-05
1942	0.00372409	0.00102772	0.00180715	0.00131599	0.0074213	0.00351559	0.081265	2.62947e-05
1943	0.00363366	0.0010277	0.00180708	0.0013161	0.00742124	0.00351563	0.0810069	2.6256e-05
1944	0.00358751	0.00102771	0.00177498	0.00131601	0.00751519	0.00351559	0.079435	2.62702e-05
1945	0.00358742	0.00102772	0.00176484	0.00131607	0.00774863	0.00356898	0.0779494	2.62906e-05
1946	0.00358746	0.0010277	0.00176483	0.00131605	0.00817848	0.00364938	0.0766577	2.62561e-05
1947	0.00358745	0.00102773	0.00177851	0.00131601	0.00808927	0.00374088	0.0745878	2.62752e-05
1948	0.00358745	0.00102769	0.00183958	0.00131603	0.00809795	0.00386411	0.0718217	2.62726e-05
1949	0.00358745	0.00102775	0.00183956	0.00131615	0.00842291	0.0038641	0.0704739	2.62674e-05
1950	0.000496551	0.00403599	0.0227843	0.00107118	0.00381485	0.0143273	0.0931019	0.00168221
1951	0.000496506	0.00467093	0.0235572	0.00107125	0.00415395	0.0148574	0.0931629	0.00168215
1952	0.0004965	0.00541109	0.0233655	0.00107126	0.00419714	0.0144899	0.0923383	0.00168215
1953	0.000496465	0.00487645	0.0231047	0.00107123	0.00419722	0.0152533	0.0905527	0.00168219
1954	0.000496521	0.00487647	0.0222284	0.00107122	0.00419718	0.015749	0.0865402	0.00168216
1955	0.000496449	0.00490017	0.0228909	0.00107091	0.00419717	0.0164006	0.0843686	0.00168218
1956	0.000496535	0.00492312	0.0237439	0.0010699	0.00419718	0.0177093	0.0819158	0.00168215
1957	0.000496452	0.00506277	0.0235844	0.00106989	0.00419711	0.0182962	0.0811016	0.00168216
1958	0.000496526	0.00507738	0.0230666	0.0010699	0.00419718	0.0185355	0.0810748	0.00168218
1959	0.000496495	0.00547839	0.0239179	0.00106983	0.00419721	0.0188886	0.0743041	0.00168214
1960	0.0133501	0.000284457	0.0059083	0.00983355	1.76916e-05	0.00493101	0.00179801	0.000420291
1961	0.0132231	0.00028448	0.00600298	0.00990415	1.76663e-05	0.00493091	0.00183405	0.000420273
1962	0.0128837	0.000284482	0.00593172	0.00979077	1.77053e-05	0.00496402	0.0018577	0.00042035
1963	0.0126271	0.00028446	0.00630469	0.00981338	1.76611e-05	0.00497564	0.00185771	0.000420298
1964	0.0124582	0.00028444	0.00641014	0.00975994	1.7691e-05	0.00499129	0.00185767	0.000420396
1965	0.0112571	0.000284481	0.00625201	0.00974906	1.76868e-05	0.0049837	0.00185767	0.000420255
1966	0.0108806	0.000284473	0.00614435	0.00972381	1.76516e-05	0.00495156	0.00185757	0.000418275
1967	0.0105625	0.000284481	0.00599464	0.0098072	1.767e-05	0.00495158	0.00187524	0.000416139
1968	0.00963295	0.000284451	0.00535971	0.00978666	2.06543e-05	0.00493772	0.00191863	0.000414388
1969	0.0085225	0.000284472	0.00558539	0.00957306	2.32977e-05	0.00507055	0.00197257	0.00039096
1970	0.00201831	0.00129311	0.00384305	0.00272808	0.000678925	0.00432558	0.000395273	0.000882124
1971	0.00197568	0.0012931	0.0038467	0.00266732	0.000510925	0.00432394	0.000395255	0.000881968
1972	0.00197569	0.00129313	0.00384668	0.00267513	0.000602588	0.00432405	0.000395286	0.000881972
1973	0.00197573	0.00129307	0.00384674	0.00265911	0.000591107	0.00432399	0.000395307	0.000882137
1974	0.00197571	0.00129316	0.00385287	0.00264863	0.000645831	0.00432626	0.000395302	0.000881942
1975	0.00197566	0.00129308	0.0038558	0.00263766	0.00085982	0.00435717	0.000395306	0.000882019
1976	0.0019757	0.00129322	0.00385699	0.00262042	0.00111297	0.00435717	0.00039525	0.00088198
1977	0.00187767	0.00129309	0.00386037	0.00261478	0.00142257	0.00435721	0.000395289	0.00087739
1978	0.00183877	0.00129312	0.00386956	0.00262716	0.00169864	0.00435712	0.000395287	0.000874153
1979	0.00183869	0.00129312	0.00386964	0.00267185	0.00214591	0.00435719	0.000395281	0.000873598
1980	0.00538557	0.000129627	0.00195929	0.00525887	6.32202e-09	0.00295308	0.000715232	0.00845586
1981	0.00488888	0.00012958	0.00211682	0.00525891	1.68587e-08	0.00295321	0.000732134	0.00847339
1982	0.00477409	0.000129583	0.00219271	0.00525894	1.47514e-08	0.00295313	0.000735231	0.00851038
1983	0.00460432	0.000129559	0.00212583	0.00531043	8.42937e-09	0.00295308	0.000735342	0.00854925
1984	0.00449033	0.000129577	0.00212674	0.00544402	9.48304e-09	0.00295322	0.000735277	0.008552
1985	0.00470769	0.000129561	0.00229353	0.00544405	1.05367e-08	0.00295311	0.00073537	0.00862513
1986	0.005411	0.000129565	0.00250789	0.00544396	1.2644e-08	0.00295914	0.000735309	0.00862502
1987	0.00619776	0.000129628	0.00248734	0.00544402	1.47514e-08	0.00298604	0.000735346	0.00862518
1988	0.00619772	0.000129566	0.00249412	0.00544751	1.05367e-08	0.00299741	0.000735316	0.00867072
1989	0.00619778	0.000129567	0.00249499	0.00547673	8.42937e-09	0.00302941	0.000735285	0.00863666
1990	0.00236261	0.0020393	0.0151054	0.00613904	0.00300209	0.00870932	0.00511725	0.00433005
1991	0.00236276	0.0020338	0.0158568	0.00614739	0.00309666	0.00864098	0.00553655	0.0043571
1992	0.00236258	0.00202299	0.0157065	0.00616565	0.00322383	0.00884928	0.0056301	0.00436306
1993	0.00236261	0.00202947	0.0156446	0.00619659	0.0033264	0.00883806	0.00579324	0.00436326
1994	0.00236266	0.00202673	0.0164176	0.00623434	0.00338926	0.00882864	0.0058039	0.00436321
1995	0.00236272	0.00200996	0.0161264	0.00635036	0.00341509	0.00887323	0.00585724	0.00433019
1996	0.00236255	0.00217272	0.015614	0.00654481	0.00347909	0.00906476	0.00585714	0.00432836
1997	0.00236265	0.00217606	0.0155173	0.00659374	0.00342013	0.00920695	0.00585729	0.00431834
1998	0.00236258	0.00217595	0.0154786	0.00662577	0.00338871	0.00921209	0.00610038	0.0043105
1999	0.00236198	0.00217607	0.0169406	0.00683117	0.00341872	0.00921205	0.00642151	0.0043044
2000	0.020699	0.0224468	0.00491796	0.000895881	0.0397762	0.0109946	0.0371954	0.0100033
2001	0.00956323	0.0242097	0.00942843	0.0123122	0.00726807	0.0124438	0.00413915	0.0499801
2002	0.00803264	0.00144482	0.00402636	0.00343783	0.0486224	0.0157591	0.0113346	0.0262103
2003	0.00426853	0.0100929	0.0177055	0.0221579	0.000774441	0.00888803	0.0077948	0.00041852
2004	0.00566145	0.00484243	0.0568056	0.00751553	0.0290835	0.0120683	0.00787689	0.00106584

## Sheet: Forest loss from turnover
	South & Central America	South & Southeast Asia	Africa & Middle East	North America	China Region	Western Europe	Former Soviet Union	Pacific Developed Region
1800	0.00356602	0.00423198	0.073794	0	0.000525217	0	0	2.34576e-05
1801	0.00355488	0.00425849	0.0740958	0	0.000553587	0	0	2.35368e-05
1802	0.00354016	0.00428571	0.0743464	0	0.000565426	0	0	3.05363e-05
1803	0.00352335	0.00431273	0.0746498	0	0.000575947	0	0	3.04251e-05
1804	0.00350958	0.00433947	0.0749441	0	0.000587882	0	0	3.03113e-05
1805	0.00349401	0.00436581	0.0752536	0	0.0005999	0	0	3.01999e-05
1806	0.00348098	0.00439205	0.0755541	0	0.000611677	0	0	3.00916e-05
1807	0.00340778	0.00441838	0.0758981	0	0.000623718	0	0	2.99777e-05
1808	0.0032635	0.00444611	0.0762829	0	0.000635599	0	0	2.98693e-05
1809	0.00310725	0.00447449	0.0766514	0	0.000669058	0	0	2.97498e-05
1810	0.00309415	0.00450232	0.0771067	0	0.000748267	0	0	2.96442e-05
1811	0.00311582	0.00452997	0.0775897	0	0.000765236	0	0	2.95273e-05
1812	0.00313639	0.00455741	0.0781149	0	0.000789382	0	0	2.94218e-05
1813	0.00317219	0.00458506	0.0786362	0	0.000828447	0	0	2.93107e-05
1814	0.00319773	0.00461272	0.0791373	0	0.000867527	0	0	2.91966e-05
1815	0.00326311	0.00464036	0.0796169	0	0.000903105	0	0	2.90855e-05
1816	0.00335622	0.00466959	0.0801158	0	0.000929196	0	0	2.89714e-05
1817	0.00348537	0.00470253	0.0805821	0	0.000955311	0	0	2.8863e-05
1818	0.00357937	0.00473595	0.0810303	0	0.000985541	0	0	2.87519e-05
1819	0.00366392	0.00477055	0.0814479	0	0.00102162	0	0	2.86379e-05
1820	0.00379171	0.00480108	0.0817815	0	0.00105193	0	0	2.85294e-05
1821	0.00388542	0.00485056	0.0822996	0	0.00119103	0	0	2.8421e-05
1822	0.00395995	0.00490108	0.0827724	0	0.00136312	0	0	2.83096e-05
1823	0.00452392	0.00495184	0.083237	0	0.00152776	0	0	2.81985e-05
1824	0.00516832	0.00500241	0.0836552	0	0.00166965	0	0	2.80874e-05
1825	0.0056022	0.00505314	0.0839611	0	0.00178815	0	0	2.79789e-05
1826	0.00591704	0.0051001	0.0843118	0	0.00194972	0	0	2.78648e-05
1827	0.00605489	0.00513584	0.0847459	0	0.00210802	0	0	2.77536e-05
1828	0.00614098	0.00517143	0.0851554	0	0.00220084	0	0	2.7645e-05
1829	0.0062412	0.00520717	0.0854736	0	0.00226368	0	0	2.7531e-05
1830	0.00630669	0.00524244	0.0859051	0	0.00233315	0	0	2.74225e-05
1831	0.00636032	0.00527671	0.0861048	0	0.00237332	0	0	2.73142e-05
1832	0.006419	0.0053108	0.0863171	0	0.00241321	0	0	2.72002e-05
1833	0.00646754	0.00534483	0.0865688	0	0.00245307	0	0	2.70889e-05
1834	0.00652586	0.00537884	0.086827	0	0.00249299	0	0	2.69803e-05
1835	0.0065688	0.00541284	0.0870637	0	0.0025195	0	0	2.6872e-05
1836	0.0066116	0.00544691	0.0872857	0	0.00253343	0	0	2.67579e-05
1837	0.00667007	0.00548095	0.0875145	0	0.00254738	0	0	2.66494e-05
1838	0.00671191	0.00551503	0.0877627	0	0.00256134	0	0	2.65381e-05
1839	0.00676897	0.0055491	0.0879857	0	0.00257529	0	0	2.64297e-05
1840	0.00686017	0.00558336	0.0882122	0	0.00258901	0	0	2.63183e-05
1841	0.00697712	0.00562109	0.0884599	0	0.00260068	0	0	2.62099e-05
1842	0.00706822	0.00565969	0.0887336	0	0.00261233	0	0	2.60987e-05
1843	0.00715433	0.00569819	0.0889947	0	0.00262396	0	0	2.59873e-05
1844	0.00725138	0.00573434	0.0892486	0	0.00263561	0	0	2.5876e-05
1845	0.0073455	0.00577036	0.0895104	0	0.00264725	0	0	2.57619e-05
1846	0.00742359	0.0058068	0.0897672	0	0.00265892	0	0	2.56563e-05
1847	0.00751831	0.00584455	0.0900288	0	0.0026706	0	0	2.55421e-05
1848	0.00761537	0.00588232	0.0902809	0	0.00268227	0	0	2.54337e-05
1849	0.00767134	0.00591904	0.090514	0	0.00269398	0	0	2.53251e-05
1850	0.00776388	0.00594489	0.0907576	0	0.00271112	0	0	2.52139e-05
1851	0.00788187	0.0059702	0.0910032	0	0.00270913	0	0	2.51052e-05
1852	0.00799981	0.00599404	0.0912753	0	0.00270686	0	0	2.4994e-05
1853	0.00811269	0.00602828	0.0915387	0	0.00270461	0	0	2.48799e-05
1854	0.00823141	0.00606851	0.0918018	0	0.0027023	0	0	2.47686e-05
1855	0.00838081	0.00610717	0.0920938	0	0.00269993	0	0	2.46601e-05
1856	0.00850291	0.00614357	0.0923761	0	0.00269768	0	0	2.4546e-05
1857	0.00861787	0.00618552	0.0926728	0	0.00269543	0	0	2.44346e-05
1858	0.00875851	0.00622463	0.0929805	0	0.0026932	0	0	2.43235e-05
1859	0.00892068	0.00625902	0.0932734	0	0.00269097	0	0	2.42092e-05
1860	0.00894769	0.00627634	0.0935695	0	0.00265706	0	0	2.41008e-05
1861	0.00891454	0.0062968	0.0938417	0	0.00262004	0	0	2.39838e-05
1862	0.00888579	0.00631683	0.0941308	0	0.00258314	0	0	2.38697e-05
1863	0.00889865	0.00634736	0.094415	0	0.00254636	0	0	2.37528e-05
1864	0.00888752	0.00637931	0.0947111	0	0.00249464	0	0	2.36386e-05
1865	0.00885743	0.00641395	0.0950227	0	0.00239565	0	0	2.35217e-05
1866	0.00883002	0.00645315	0.0953341	0	0.00225246	0	0	2.34049e-05
1867	0.00884994	0.00648147	0.0956364	0	0.0019487	0	0	2.3288e-05
1868	0.00886203	0.00651221	0.0959373	0	0.00155952	0	0	2.31793e-05
1869	0.00887457	0.00654745	0.0956929	0	0.000911286	0	0	2.30681e-05
1870	0.00895071	0.00662278	0.0965864	0	0.00100923	0	0	2.29483e-05
1871	0.00899899	0.00669982	0.0969289	0	0.000986068	0	0	2.28341e-05
1872	0.00903904	0.00677284	0.0972674	0	0.000962976	0	0	2.27088e-05
1873	0.0090804	0.00683263	0.0976109	0	0.000939857	0	0	2.25976e-05
1874	0.00909605	0.00687791	0.097955	0	0.000916737	0	0	2.24805e-05
1875	0.00903648	0.00691714	0.0983072	0	0.000893657	0	0	2.23636e-05
1876	0.0088702	0.00695685	0.0986261	0	0.00087059	0	0	2.22467e-05
1877	0.00852919	0.00700472	0.0988975	0	0.000847499	0	0	2.21297e-05
1878	0.00776712	0.00704252	0.09915	0	0.000824383	0	0	2.20184e-05
1879	0.00665532	0.00707875	0.0982392	0	0.00080136	0	0	2.18959e-05
1880	0.00684844	0.00709217	0.099651	0	0.000802733	0	0	2.17789e-05
1881	0.00699524	0.00714391	0.0999193	0	0.000809848	0	0	2.19196e-05
1882	0.00722781	0.00721402	0.100167	0	0.000817123	0	0	2.8457e-05
1883	0.00750436	0.0073252	0.10041	0	0.000824421	0	0	2.83137e-05
1884	0.00773924	0.0074048	0.10066	0	0.000831689	0	0	2.8173e-05
1885	0.00799452	0.00748278	0.100873	0	0.000838971	0	0	2.80353e-05
1886	0.00843017	0.00755725	0.101084	0	0.000846242	0	0	2.78976e-05
1887	0.00944026	0.00764712	0.101268	0	0.00085354	0	0	2.7757e-05
1888	0.0109623	0.00774144	0.101436	0	0.000860824	0	0	2.76166e-05
1889	0.0121872	0.0078364	0.101593	0	0.000868097	0	0	2.74788e-05
1890	0.0126708	0.00792089	0.101734	0	0.000876145	0	0	2.73295e-05
1891	0.0127564	0.00799351	0.101917	0	0.000887534	0	0	2.71834e-05
1892	0.0128236	0.00806829	0.102098	0	0.000899333	0	0	2.70399e-05
1893	0.0128666	0.00814053	0.102303	0	0.000911161	0	0	2.68907e-05
1894	0.0126865	0.00822378	0.102509	0	0.000923002	0	0	2.67473e-05
1895	0.0123984	0.00831085	0.102742	0	0.000934831	0	0	2.66037e-05
1896	0.0121052	0.00840366	0.102916	0	0.000946692	0	0	2.64572e-05
1897	0.0116862	0.00849854	0.103079	0	0.000958566	0	0	2.63082e-05
1898	0.0111088	0.00858056	0.103219	0	0.000974314	0	0	2.61619e-05
1899	0.0101181	0.00866675	0.103342	0	0.000996623	0	0	2.60157e-05
1900	0.0105475	0.00872052	0.103165	0	0.00100699	0	0	2.58607e-05
1901	0.0106718	0.00878097	0.103257	0	0.00100559	0	0	2.57084e-05
1902	0.0109008	0.00885356	0.10333	0	0.00100433	0	0	2.55621e-05
1903	0.0111638	0.0089209	0.103376	0	0.00100314	0	0	2.54074e-05
1904	0.0114831	0.00898855	0.103425	0	0.00100203	0	0	2.52553e-05
1905	0.011753	0.0090551	0.103481	0	0.00100102	0	0	2.5103e-05
1906	0.0119962	0.00911202	0.103519	0	0.00100011	0	0	2.49426e-05
1907	0.0121511	0.00916346	0.103379	0	0.000999258	0	0	2.47934e-05
1908	0.0123256	0.00917924	0.10313	0	0.00100032	0	0	2.46411e-05
1909	0.0124942	0.00915976	0.102937	0	0.00100434	0	0	2.44834e-05
1910	0.0127111	0.00923194	0.103581	0	0.00112206	0	0	2.4453e-05
1911	0.0130512	0.00932721	0.104129	0	0.00124126	0	0	2.44281e-05
1912	0.0134822	0.00945095	0.104658	0	0.00136065	0	0	2.44092e-05
1913	0.0140887	0.00958946	0.105188	0	0.00148038	0	0	2.43788e-05
1914	0.0150162	0.00975621	0.105748	0	0.00152457	0	0	2.43486e-05
1915	0.0157768	0.00991621	0.106308	0	0.0015653	0	0	2.43296e-05
1916	0.0161939	0.0100583	0.106874	0	0.00160604	0	0	2.43051e-05
1917	0.0166293	0.0101703	0.107446	0	0.00163161	0	0	2.42775e-05
1918	0.0169959	0.0103176	0.108016	0	0.00165581	0	0	2.42529e-05
1919	0.0181159	0.0105262	0.108569	0	0.00167996	0	0	2.42252e-05
1920	0.0192938	0.0106724	0.109255	0	0.00175724	0	0	2.41754e-05
1921	0.0196089	0.0107464	0.110352	0	0.00176334	0	0	2.41222e-05
1922	0.0198187	0.0108273	0.111464	0	0.00176315	0	0	2.40665e-05
1923	0.0201277	0.0109051	0.112497	0	0.001763	0	0	2.40133e-05
1924	0.0204755	0.0109688	0.113563	0	0.00176283	0	0	2.39489e-05
1925	0.0208095	0.0110269	0.114593	0	0.00176266	0	0	2.39018e-05
1926	0.0210573	0.0110843	0.115564	0	0.0017625	0	0	2.384e-05
1927	0.0213086	0.0111415	0.116546	0	0.00176233	0	0	2.37843e-05
1928	0.0215874	0.0111976	0.117588	0	0.0017622	0	0	2.37312e-05
1929	0.0218813	0.0112539	0.118794	0	0.00176208	0	0	2.36724e-05
1930	0.0221844	0.0113166	0.120012	0	0.00176518	0	0	2.35768e-05
1931	0.0230023	0.0114436	0.122149	0	0.00177634	0	0	2.34698e-05
1932	0.0237001	0.0115493	0.124091	0	0.0017977	0	0	2.33714e-05
1933	0.0244526	0.0116423	0.126166	0	0.00182603	0	0	2.3273e-05
1934	0.0250386	0.0117382	0.128244	0	0.00185835	0	0	2.31687e-05
1935	0.0255832	0.0118393	0.130554	0	0.00189069	0	0	2.307e-05
1936	0.0260809	0.011943	0.132815	0	0.00192309	0	0	2.2969e-05
1937	0.0267821	0.0120409	0.135143	0	0.00194801	0	0	2.28648e-05
1938	0.0275923	0.0121366	0.13741	0	0.00198481	0	0	2.27635e-05
1939	0.027762	0.0122353	0.139466	0	0.00202494	0	0	2.26677e-05
1940	0.0286389	0.0123159	0.141592	0	0.00206512	0	0	2.24928e-05
1941	0.0287855	0.0124049	0.145953	0	0.00208153	0	0	2.23174e-05
1942	0.028835	0.012494	0.149811	0	0.00209798	0	0	2.2145e-05
1943	0.0288942	0.0125841	0.153683	0	0.00211442	0	0	2.19671e-05
1944	0.029039	0.0126733	0.15811	0	0.00213089	0	0	2.17975e-05
1945	0.0290296	0.0127668	0.162594	0	0.00214739	0	0	2.1617e-05
1946	0.0291909	0.0128751	0.167032	0	0.00216392	0	0	2.14473e-05
1947	0.0291364	0.0129865	0.171078	0	0.00218043	0	0	2.12807e-05
1948	0.0285681	0.0130973	0.175498	0	0.00219699	0	0	2.11e-05
1949	0.0264528	0.0132079	0.176719	0	0.00221358	0	0	2.09275e-05
1950	0.0280135	0.0132228	0.184725	0	0.00222914	0	0	2.07553e-05
1951	0.0293075	0.0135178	0.190766	0	0.00237149	0	0	2.05856e-05
1952	0.0308674	0.0138619	0.197085	0	0.0025627	0	0	2.04186e-05
1953	0.0325841	0.0142072	0.203226	0	0.00293296	0	0	2.02491e-05
1954	0.0340211	0.014548	0.209466	0	0.00319962	0	0	2.00737e-05
1955	0.0353482	0.0149155	0.216264	0	0.00329835	0	0	1.99068e-05
1956	0.0366494	0.0152877	0.222026	0	0.00336934	0	0	1.97341e-05
1957	0.038105	0.0156382	0.226748	0	0.00343959	0	0	1.95646e-05
1958	0.0394984	0.0159887	0.230674	0	0.00356553	0	0	1.93951e-05
1959	0.040737	0.0164263	0.2336	0	0.00378702	0	0	1.92223e-05
1960	0.0418038	0.0169479	0.238068	0	0.00398613	0	0	1.92246e-05
1961	0.0422245	0.0169845	0.238581	0	0.00403082	0	0	1.97731e-05
1962	0.0426194	0.0169717	0.239297	0	0.00407274	0	0	2.03216e-05
1963	0.0429194	0.0169455	0.240118	0	0.00411315	0	0	2.08702e-05
1964	0.043365	0.0169189	0.240678	0	0.0041552	0	0	2.14161e-05
1965	0.0437953	0.0168927	0.241312	0	0.00419747	0	0	2.19595e-05
1966	0.0442191	0.0168587	0.241836	0	0.00423884	0	0	2.25113e-05
1967	0.0445915	0.0168211	0.24234	0	0.00427937	0	0	2.30634e-05
1968	0.0450308	0.0167831	0.242899	0	0.00432141	0	0	2.36126e-05
1969	0.0441719	0.0163727	0.240227	0	0.00449114	0	0	2.41596e-05
1970	0.0459571	0.0167647	0.243894	0	0.00465424	0	0	2.47089e-05
1971	0.0464726	0.0168177	0.244336	0	0.00499236	0	0	2.5179e-05
1972	0.0471713	0.0168868	0.244754	0	0.00509181	0	0	2.56519e-05
1973	0.0481078	0.0169532	0.245176	0	0.00517325	0	0	2.61307e-05
1974	0.0490267	0.0170212	0.245578	0	0.00525531	0	0	2.65982e-05
1975	0.0499653	0.0170688	0.246071	0	0.00533911	0	0	2.70745e-05
1976	0.0509399	0.0171002	0.246546	0	0.0054259	0	0	2.75423e-05
1977	0.0519367	0.0171274	0.247008	0	0.00551148	0	0	2.88848e-05
1978	0.0529801	0.0171536	0.24747	0	0.00559655	0	0	3.48356e-05
1979	0.0517581	0.0171807	0.247715	0	0.00568267	0	0	3.99355e-05
1980	0.0544791	0.0172625	0.248253	0	0.00583319	0	0	4.58635e-05
1981	0.0554659	0.0174163	0.24909	0	0.00594742	0	0	4.66177e-05
1982	0.056517	0.0176097	0.249875	0	0.00606323	0	0	4.73779e-05
1983	0.0573533	0.0178195	0.250627	0	0.00618024	0	0	4.81248e-05
1984	0.0582111	0.0179843	0.251408	0	0.00629847	0	0	4.88799e-05
1985	0.0592599	0.0181504	0.252173	0	0.00641796	0	0	4.9627e-05
1986	0.0604614	0.0183178	0.252912	0	0.00653867	0	0	5.0385e-05
1987	0.0616625	0.0184924	0.253628	0	0.00666076	0	0	5.11384e-05
1988	0.0630376	0.0186908	0.254255	0	0.00678421	0	0	5.18914e-05
1989	0.0642577	0.0188854	0.248957	0	0.00617723	0	0	6.08474e-05
1990	0.0655321	0.0190529	0.25523	0	0.00700825	0	0	6.57487e-05
1991	0.0662756	0.0191174	0.257176	0	0.00702373	0	0	6.63695e-05
1992	0.0669955	0.0191831	0.258714	0	0.0070361	0	0	6.69493e-05
1993	0.0678147	0.0192818	0.260318	0	0.00704842	0	0	6.75392e-05
1994	0.0686058	0.0193871	0.261636	0	0.00706079	0	0	6.81137e-05
1995	0.0698295	0.0194864	0.262728	0	0.00707309	0	0	6.87125e-05
1996	0.0704303	0.0195766	0.263106	0	0.00708548	0	0	7.30359e-05
1997	0.0710147	0.0197093	0.262418	0	0.0070979	0	0	8.23754e-05
1998	0.0720073	0.0198408	0.261352	0	0.00711035	0	0	8.30992e-05
1999	0.0683419	0.019956	0.259567	0	0.00712286	0	0	8.38175e-05
2000	0.0721645	0.0193689	0.258312	0	0.00708002	0	0	8.45319e-05
2001	0.0686807	0.0206271	0.259274	0	0.00709937	0	0	8.40809e-05
2002	0.0721061	0.0213369	0.255194	0	0.00707803	0	0	8.40893e-05
2003	0.0725204	0.0216471	0.252939	0	0.00683646	0	0	8.4554e-05
2004	0.0640054	0.0224068	0.234877	0	0.00713881	0	0	8.56039e-05

## Sheet: Wood harvest
	South & Central America	South & Southeast Asia	Africa & Middle East	North America	China Region	Western Europe	Former Soviet Union	Pacific Developed Region
1800	0.000470541	0.00267354	0.000597441	0.00149622	0.00277789	0.00534797	0.00682289	0.000830437
1801	0.000474018	0.00273409	0.000597725	0.00155031	0.00281027	0.00537379	0.00687412	0.000834364
1802	0.000475968	0.00279999	0.000598751	0.00159502	0.00284342	0.00539698	0.00692734	0.00083734
1803	0.000482782	0.00286929	0.000599745	0.00163659	0.00287699	0.00542282	0.00698294	0.000841689
1804	0.000485077	0.00294628	0.000600744	0.00167727	0.00291015	0.00544732	0.00702334	0.000844755
1805	0.000490142	0.00303049	0.000601796	0.00171777	0.00294279	0.00547252	0.0070478	0.000847092
1806	0.000493809	0.00312036	0.00060281	0.00175814	0.00297609	0.00549799	0.00707246	0.000850319
1807	0.000495898	0.00321773	0.000603005	0.00179831	0.00300926	0.0055243	0.00709704	0.000854001
1808	0.000502313	0.00332868	0.000604044	0.00183926	0.00304216	0.00555006	0.00712178	0.000856698
1809	0.00050473	0.00344819	0.000605077	0.00187973	0.00307547	0.00557561	0.00714649	0.000860605
1810	0.000509558	0.00358224	0.000606063	0.00192036	0.0031095	0.00560224	0.00716977	0.000864658
1811	0.000514667	0.00373267	0.000607465	0.00197551	0.00310802	0.00564286	0.00719809	0.000868923
1812	0.000518726	0.00390213	0.000608602	0.0020369	0.00310741	0.00567845	0.00722662	0.000871138
1813	0.000525871	0.00409577	0.000610002	0.00209212	0.00310634	0.00571571	0.00725513	0.000874085
1814	0.000529063	0.00432065	0.000611598	0.00214552	0.00310499	0.00575085	0.00728346	0.000877871
1815	0.000537031	0.00457943	0.00061327	0.00219808	0.0031039	0.00578883	0.00731216	0.000880976
1816	0.000540274	0.00488802	0.000614923	0.00225016	0.00310266	0.00582499	0.00734067	0.000884808
1817	0.000547959	0.00525719	0.000616264	0.00230282	0.00310179	0.00586251	0.00736931	0.000885749
1818	0.000551479	0.00570832	0.000617974	0.002355	0.00310038	0.00589929	0.00739821	0.000889325
1819	0.000558755	0.00627208	0.000619613	0.00240747	0.0030994	0.00593691	0.0074269	0.000892632
1820	0.000562491	0.00700057	0.000621356	0.00245979	0.00309701	0.0059655	0.00745501	0.000896266
1821	0.000572012	0.00797211	0.000627921	0.00254998	0.00311809	0.00599874	0.00748794	0.000899127
1822	0.00058027	0.00887588	0.000632627	0.00262144	0.0031384	0.00602616	0.00752073	0.000900242
1823	0.000586434	0.00991897	0.000635609	0.00269239	0.0031586	0.00605453	0.00755353	0.000903022
1824	0.00059595	0.0115525	0.000638379	0.00276263	0.00317895	0.00608488	0.00758587	0.000905149
1825	0.000604387	0.0115536	0.000640794	0.00283226	0.00319908	0.00611293	0.00761844	0.000908571
1826	0.000610346	0.0115541	0.000644427	0.00290229	0.00321929	0.00614067	0.00765157	0.000910026
1827	0.000619693	0.0115559	0.000647265	0.00297181	0.00323923	0.00617114	0.00768462	0.000913222
1828	0.000628264	0.0115547	0.000650126	0.00304201	0.00325965	0.00619983	0.00771747	0.000915734
1829	0.000634278	0.0115565	0.00065295	0.00311233	0.00327966	0.00622944	0.00775063	0.000918334
1830	0.00064345	0.0115569	0.000656489	0.00318261	0.00330072	0.00626111	0.00776952	0.000921479
1831	0.000652456	0.0115539	0.00065965	0.0032855	0.00330267	0.00629128	0.00782795	0.000921806
1832	0.00065957	0.0115484	0.000662599	0.00337518	0.00330502	0.00631775	0.0078869	0.000923481
1833	0.00066783	0.0115465	0.000665645	0.00346505	0.00330767	0.00634356	0.00794593	0.000925861
1834	0.000676725	0.0115428	0.000668756	0.00355514	0.00331001	0.00636978	0.00800571	0.000927729
1835	0.000684868	0.0115395	0.000671909	0.00364511	0.00331242	0.00639737	0.00806543	0.000928387
1836	0.000691972	0.0115361	0.000675042	0.00373514	0.00331492	0.00642526	0.0081257	0.0009315
1837	0.000700913	0.0115327	0.000677874	0.0038256	0.00331702	0.00645342	0.008186	0.000935838
1838	0.000709589	0.0115284	0.000680992	0.00391562	0.00331953	0.00648282	0.00824674	0.000938253
1839	0.000715923	0.011526	0.000684372	0.00400534	0.0033221	0.00651313	0.00830773	0.000939596
1840	0.000724985	0.0115237	0.000687782	0.00409603	0.00332452	0.00654864	0.0083807	0.000944843
1841	0.000736431	0.0115351	0.000691358	0.00421335	0.00332705	0.00661298	0.00842479	0.000945492
1842	0.000744665	0.0115471	0.000695249	0.00433565	0.00332929	0.00666741	0.0084689	0.000947586
1843	0.000756302	0.0115578	0.000699297	0.00445705	0.0033316	0.0067254	0.00851311	0.000950061
1844	0.000767663	0.0115694	0.000703498	0.00457854	0.00333349	0.00678187	0.00855776	0.00095452
1845	0.000775982	0.0115803	0.000706854	0.00470001	0.00333366	0.00684014	0.00860235	0.000956324
1846	0.000787586	0.0115943	0.000709767	0.00482144	0.00333375	0.00689855	0.00864666	0.000959767
1847	0.000799021	0.0116062	0.000713124	0.00494331	0.00333422	0.00695499	0.00869145	0.000962683
1848	0.000808256	0.0116173	0.000716115	0.00506529	0.00333427	0.00700673	0.00873626	0.000964474
1849	0.000818832	0.0116286	0.000718794	0.00518677	0.00333442	0.00701919	0.00878118	0.000965696
1850	0.000830058	0.0116418	0.000721558	0.00530873	0.00332507	0.00702899	0.00882579	0.000970621
1851	0.000842135	0.0116634	0.000722701	0.00550859	0.00330249	0.00709362	0.0089124	0.00097658
1852	0.000852544	0.011685	0.000725613	0.00570098	0.00327986	0.00716029	0.00899982	0.000982571
1853	0.000865403	0.0117066	0.000728811	0.00589266	0.00325731	0.00722806	0.00908699	0.000986193
1854	0.000877858	0.0117295	0.000732337	0.00608384	0.00323465	0.00729831	0.00917474	0.000990208
1855	0.000887881	0.0117499	0.000732782	0.00627376	0.00321386	0.00736759	0.0092632	0.000993643
1856	0.000900524	0.0117722	0.000732858	0.00646502	0.00319085	0.00744764	0.00935186	0.00100068
1857	0.000913078	0.0117957	0.000735844	0.00665663	0.00316783	0.00752049	0.00944096	0.00100782
1858	0.000924972	0.0118157	0.000737892	0.00684688	0.00314538	0.00759298	0.00953041	0.00101078
1859	0.000935639	0.0118381	0.000736864	0.0070373	0.00312309	0.00766784	0.00962064	0.00101596
1860	0.000948163	0.0118624	0.000738948	0.00722563	0.00310031	0.00774349	0.00971331	0.00102308
1861	0.000960265	0.0118884	0.000742793	0.00737687	0.00310163	0.00783383	0.00978561	0.00102672
1862	0.000969694	0.0119147	0.000745988	0.00752459	0.00309142	0.00792586	0.00985809	0.00103205
1863	0.0009819	0.0119436	0.000749298	0.00767235	0.00308181	0.00802036	0.00993078	0.00103846
1864	0.000994193	0.0119692	0.000753145	0.00781957	0.00307227	0.00811547	0.0100036	0.00104458
1865	0.00100578	0.0119986	0.000755844	0.00797393	0.00306248	0.00821301	0.0100765	0.00104669
1866	0.00101557	0.0120247	0.000759732	0.00812833	0.0030529	0.00831204	0.0101497	0.0010511
1867	0.0010277	0.0120537	0.000763579	0.00827647	0.00304321	0.00841463	0.0102229	0.001058
1868	0.00103993	0.012079	0.000768581	0.00842379	0.00303401	0.00851832	0.0102965	0.00106237
1869	0.00105104	0.0121059	0.000769929	0.00857239	0.0030243	0.00862266	0.0103701	0.00106728
1870	0.00106131	0.012135	0.000773539	0.00872166	0.00302664	0.0087289	0.0104454	0.00107407
1871	0.0010755	0.0121586	0.000777587	0.0089673	0.00303763	0.00883439	0.0105772	0.00107749
1872	0.0010877	0.0121816	0.000781611	0.00920476	0.00304809	0.00894168	0.0107093	0.00108671
1873	0.00110086	0.0122057	0.000784772	0.00944208	0.00305879	0.009055	0.0108423	0.00109167
1874	0.00111494	0.0122284	0.000789974	0.00967954	0.00306931	0.00917328	0.0109763	0.00109715
1875	0.00112705	0.0122546	0.000792868	0.00991747	0.00308007	0.00929549	0.0111107	0.00110584
1876	0.00114016	0.0122798	0.000794568	0.0101551	0.00309058	0.00942276	0.011246	0.0011105
1877	0.00115412	0.0123011	0.000798684	0.0103927	0.00310152	0.00955554	0.0113822	0.00111826
1878	0.00116668	0.0123265	0.000802379	0.0106304	0.00311225	0.00969526	0.0115193	0.00112624
1879	0.0011793	0.0123495	0.00080645	0.0108682	0.0031228	0.00984254	0.0116572	0.00113158
1880	0.0011931	0.0123738	0.000811027	0.0110777	0.00313391	0.00999799	0.0117928	0.00113696
1881	0.00121574	0.0124301	0.000813877	0.0113536	0.00314586	0.0101799	0.0119464	0.00114429
1882	0.00123788	0.0124871	0.00081628	0.0116051	0.00315932	0.0103725	0.0121011	0.00115861
1883	0.0012615	0.0125419	0.000818883	0.0118566	0.00317215	0.0105765	0.0122563	0.00116169
1884	0.00128394	0.0126014	0.000823283	0.012109	0.00318503	0.0107921	0.0124133	0.00117615
1885	0.00130599	0.0126564	0.000827169	0.0123614	0.00319786	0.0110216	0.0125715	0.00118489
1886	0.00132933	0.0127129	0.000830557	0.0126139	0.00321053	0.0112682	0.0127307	0.00119244
1887	0.00135176	0.0127699	0.000833355	0.0128666	0.00322366	0.0115334	0.0128911	0.00120225
1888	0.00137357	0.0128265	0.000837855	0.013119	0.00323495	0.0118182	0.0130519	0.00121292
1889	0.00139665	0.0128826	0.000842163	0.013372	0.00324151	0.0121272	0.0132153	0.00122049
1890	0.00141935	0.0129422	0.000846634	0.0136261	0.00324767	0.0124633	0.0133682	0.00123045
1891	0.00144347	0.0129865	0.000849492	0.0138858	0.00326523	0.0129576	0.01354	0.00124273
1892	0.00146727	0.0130337	0.000851827	0.0141427	0.00328243	0.0134546	0.0137123	0.00125199
1893	0.00149188	0.0130794	0.00085649	0.0143997	0.00330005	0.0139831	0.013887	0.00126242
1894	0.0015163	0.0131261	0.000861383	0.0146571	0.00331714	0.0146777	0.0140639	0.00127546
1895	0.00154061	0.0131744	0.000866866	0.0149148	0.00333351	0.0154184	0.0142439	0.00128715
1896	0.00156476	0.0132202	0.000874181	0.0151725	0.00335204	0.0163286	0.0144283	0.00129572
1897	0.00158876	0.0132673	0.000881106	0.0154307	0.00336841	0.0174868	0.0146185	0.00130633
1898	0.00162158	0.0133137	0.000887592	0.0156816	0.00338598	0.0190145	0.0148184	0.00131746
1899	0.00164567	0.0133615	0.000893944	0.015914	0.00340175	0.0210375	0.0150365	0.00132846
1900	0.00166989	0.0134074	0.000856887	0.0158139	0.00339853	0.023617	0.0152827	0.00133918
1901	0.00170337	0.0146337	0.000870953	0.0162595	0.00341706	0.0276923	0.0156058	0.00135259
1902	0.00173676	0.0158605	0.000878849	0.0166724	0.00344854	0.032533	0.015847	0.00136788
1903	0.00176941	0.0170861	0.000882131	0.0171753	0.00347716	0.032835	0.0161052	0.00138128
1904	0.00180144	0.0183147	0.000883669	0.0175301	0.00349719	0.0325512	0.0163763	0.00139459
1905	0.00183456	0.0195399	0.000888373	0.017885	0.00351606	0.0323216	0.0166273	0.00140833
1906	0.00186738	0.0205502	0.000894767	0.0183397	0.00354511	0.0320934	0.0168817	0.00142144
1907	0.00189991	0.0213321	0.000897673	0.0186967	0.00356894	0.0318217	0.0171391	0.00143587
1908	0.00193191	0.0221114	0.000903321	0.0191352	0.00358802	0.0315414	0.0173996	0.0014506
1909	0.00196361	0.0228899	0.000958929	0.0194939	0.00360687	0.0312291	0.0176642	0.00146447
1910	0.00199599	0.0236673	0.000962763	0.0198538	0.00362463	0.0310472	0.0178292	0.00147762
1911	0.00204015	0.0236737	0.000973239	0.0202476	0.00366222	0.0313658	0.0178064	0.00149507
1912	0.00208356	0.0236833	0.000983577	0.0205872	0.00369795	0.0316815	0.0178083	0.00151463
1913	0.00212692	0.0236914	0.000993435	0.0209264	0.00373444	0.0319922	0.017794	0.00153318
1914	0.0021707	0.023699	0.00100348	0.0212661	0.00377131	0.0322968	0.0177672	0.00155176
1915	0.00221374	0.0237091	0.00101473	0.0216055	0.00380741	0.0325972	0.0177358	0.00156902
1916	0.00225783	0.0237181	0.00102325	0.0219454	0.00384375	0.0329999	0.0177086	0.00158817
1917	0.00230125	0.0237269	0.00103236	0.0222841	0.00388001	0.0334587	0.0176787	0.00160637
1918	0.00234516	0.0237363	0.00104484	0.0226247	0.00391602	0.0337989	0.0176481	0.00162455
1919	0.00238841	0.023745	0.00105563	0.0229637	0.00395183	0.0341152	0.0176156	0.00164112
1920	0.00243165	0.0237479	0.00106767	0.0232147	0.00398953	0.0343436	0.0175772	0.00165884
1921	0.00248178	0.023891	0.00115099	0.0232149	0.0040275	0.0342089	0.0176792	0.00167299
1922	0.00253106	0.0240379	0.00124186	0.0232205	0.00406824	0.0340747	0.017779	0.00168917
1923	0.00257963	0.02419	0.00133871	0.0232	0.0041074	0.0339428	0.0178783	0.00170294
1924	0.00262829	0.0243415	0.00143295	0.0231391	0.00414841	0.0338128	0.0179759	0.00171727
1925	0.00267593	0.0245009	0.00152946	0.0230849	0.00418877	0.0336783	0.0180727	0.00173149
1926	0.00272348	0.0246603	0.00162761	0.0229958	0.00423012	0.0335443	0.0181692	0.0017449
1927	0.00277093	0.0248236	0.00174444	0.0228951	0.0042708	0.0334093	0.0182656	0.00175843
1928	0.00281702	0.0249908	0.00185406	0.022781	0.00431197	0.0332779	0.0183632	0.00177199
1929	0.00286213	0.0251608	0.00196053	0.0226536	0.00435311	0.0331505	0.0184599	0.00178362
1930	0.00297457	0.0253388	0.00207617	0.0225208	0.00437243	0.0330345	0.018553	0.00179499
1931	0.00306507	0.0255312	0.00221218	0.0222806	0.00443039	0.033553	0.0188567	0.00180621
1932	0.00309345	0.0257286	0.00235046	0.0219905	0.00448888	0.0336992	0.0191588	0.00181623
1933	0.00312144	0.0259286	0.00249298	0.0216943	0.00454776	0.0335948	0.0194612	0.00182786
1934	0.00314898	0.0261334	0.00264086	0.0213892	0.00460706	0.0334862	0.0197619	0.00183837
1935	0.00317621	0.0263404	0.0027989	0.0210781	0.00466639	0.0333714	0.0200622	0.001848
1936	0.00320311	0.026551	0.00296801	0.0207573	0.00472558	0.0332433	0.0203615	0.00185738
1937	0.00322936	0.0267659	0.0031337	0.0204305	0.00478582	0.0331108	0.0206597	0.00186663
1938	0.00325955	0.0269859	0.0033001	0.0200948	0.00484419	0.0329745	0.0209566	0.00187433
1939	0.0032849	0.0272105	0.00346751	0.019753	0.0049045	0.0328375	0.0212485	0.00188214
1940	0.00331458	0.0274111	0.00364244	0.0193968	0.00498537	0.0327364	0.0214663	0.00189021
1941	0.00340381	0.027622	0.003822	0.0192509	0.00504401	0.0336909	0.021421	0.00190495
1942	0.00349262	0.0278374	0.00401755	0.0190819	0.00510235	0.0345928	0.0214106	0.00192152
1943	0.00357716	0.028058	0.00422243	0.0188919	0.0051616	0.0354942	0.0213905	0.00193367
1944	0.00366007	0.0282822	0.0044286	0.0186819	0.00522035	0.0364072	0.021347	0.00194717
1945	0.00374641	0.0285118	0.00464081	0.0184533	0.00527834	0.0373315	0.0212975	0.00196065
1946	0.00382862	0.0287464	0.00487104	0.018204	0.00533771	0.0382708	0.02125	0.00197417
1947	0.00391015	0.0289844	0.00511193	0.0179344	0.00539663	0.0392407	0.0212026	0.00198604
1948	0.00399121	0.0292266	0.00536438	0.0176451	0.00545781	0.0403264	0.021157	0.00199562
1949	0.00406101	0.029475	0.00563398	0.0173362	0.0055165	0.0417835	0.0211113	0.00200666
1950	0.00411668	0.0297552	0.00593172	0.0170155	0.00557536	0.0426459	0.0210682	0.0020171
1951	0.00421798	0.0303594	0.006367	0.0167604	0.00563065	0.0452013	0.0213803	0.00203203
1952	0.00433887	0.0309771	0.00686687	0.0164808	0.00576392	0.0488594	0.0223162	0.00205156
1953	0.00446849	0.0315981	0.00745767	0.0161772	0.00589505	0.0519083	0.0231293	0.00206706
1954	0.00458699	0.0321801	0.00813135	0.0158495	0.00602812	0.0553879	0.0239594	0.00208569
1955	0.00468141	0.0327723	0.0089635	0.0154977	0.0061611	0.0591378	0.0248395	0.0021021
1956	0.00477778	0.0333718	0.0102211	0.0151209	0.00629521	0.0629706	0.025728	0.0021155
1957	0.00487009	0.0339825	0.0118476	0.0147204	0.00643051	0.0668888	0.0266254	0.0021315
1958	0.00497348	0.0345973	0.0148083	0.0142955	0.00656753	0.0707727	0.0275344	0.00214528
1959	0.0050686	0.0352221	0.0156119	0.0138457	0.00670619	0.0747427	0.0284586	0.00215515
1960	0.00517995	0.0358336	0.0163577	0.0133439	0.0068298	0.0787702	0.0293987	0.00216532
1961	0.00551026	0.0368425	0.0174565	0.0128754	0.00718493	0.0806087	0.0293449	0.00232503
1962	0.00558898	0.0368736	0.0186775	0.0131349	0.00708981	0.0818935	0.029589	0.00214472
1963	0.00561942	0.0368339	0.020813	0.0132315	0.00730816	0.0834821	0.0308605	0.00221242
1964	0.00575052	0.0370355	0.0224606	0.0138902	0.00758303	0.0856635	0.0321119	0.00228721
1965	0.00584747	0.0371336	0.0230543	0.0142483	0.00772756	0.0872757	0.0318964	0.00223603
1966	0.0057536	0.0372368	0.0244542	0.0148629	0.00787049	0.0890372	0.0317975	0.00225196
1967	0.00587651	0.0374101	0.0252541	0.0143472	0.00808999	0.0895719	0.0324765	0.00220855
1968	0.00602445	0.0375279	0.0263607	0.0149311	0.00823949	0.0893466	0.032314	0.00210871
1969	0.00611197	0.0376345	0.0279902	0.0152126	0.00839245	0.0896354	0.0319356	0.00207154
1970	0.00627664	0.0377966	0.0293219	0.0151543	0.00862892	0.0910823	0.0326471	0.00200186
1971	0.00642864	0.0380515	0.030986	0.0152118	0.00879976	0.0912975	0.0326506	0.00196099
1972	0.00651361	0.0383999	0.036922	0.0153462	0.00900971	0.0915171	0.0325524	0.0018914
1973	0.00659255	0.0387918	0.0376292	0.0165679	0.00916744	0.0922057	0.0328524	0.00188644
1974	0.00673895	0.0387869	0.0381121	0.0162225	0.00947578	0.0926554	0.0329209	0.00181951
1975	0.00701605	0.0386429	0.0392731	0.0142042	0.0102635	0.0915527	0.0333746	0.00175243
1976	0.00723068	0.0390493	0.0403411	0.0175785	0.0104597	0.0917454	0.0327175	0.00179755
1977	0.00742754	0.0390565	0.0415607	0.0193452	0.0106724	0.0918951	0.0322355	0.00179186
1978	0.0076793	0.0391637	0.0434756	0.0216654	0.0108771	0.0924416	0.0312599	0.00173867
1979	0.0081832	0.0393865	0.0453105	0.023199	0.0112028	0.0934686	0.0308173	0.0017426
1980	0.00847755	0.0394604	0.0476689	0.0230475	0.0113647	0.0939706	0.0310132	0.00184391
1981	0.00852256	0.039395	0.0510806	0.0222533	0.0113759	0.0942285	0.0311388	0.00181536
1982	0.00865362	0.0395972	0.0553496	0.0207248	0.0116482	0.0941872	0.0310294	0.00181115
1983	0.00890217	0.0397122	0.0628328	0.0235191	0.0118059	0.0948054	0.0309928	0.00175771
1984	0.0090424	0.0459289	0.0701908	0.0256187	0.0135543	0.0955199	0.031825	0.00182379
1985	0.00917794	0.0490843	0.0727632	0.0253287	0.0144626	0.0956655	0.0318555	0.00189249
1986	0.00936531	0.0499679	0.0768289	0.0267059	0.0148447	0.0959127	0.0322111	0.00188692
1987	0.00952899	0.0509961	0.0830087	0.0280611	0.0151973	0.0962528	0.033	0.00185702
1988	0.00966755	0.05172	0.0914176	0.028405	0.0154083	0.0968984	0.0330344	0.00186288
1989	0.00992145	0.0525784	0.0975727	0.0286499	0.0156366	0.0974668	0.0330467	0.00186578
1990	0.00997468	0.0533887	0.0975415	0.0275002	0.0148565	0.0970199	0.0330431	0.00188173
1991	0.0102231	0.0546878	0.0990792	0.0264253	0.0151613	0.0965558	0.0312283	0.00189313
1992	0.0105312	0.0557512	0.100467	0.0274701	0.0156551	0.096871	0.025371	0.00188138
1993	0.0106707	0.0568271	0.105497	0.0279708	0.0162975	0.0969677	0.0216541	0.00187394
1994	0.0111058	0.057983	0.1075	0.0287726	0.0168	0.0986624	0.0173446	0.00185913
1995	0.0114379	0.0592779	0.109704	0.0291106	0.0172742	0.0997658	0.0182548	0.00185839
1996	0.0115945	0.0595382	0.111353	0.0289664	0.0176403	0.0992534	0.0176644	0.00184733
1997	0.0117402	0.0613024	0.114924	0.0286323	0.0179044	0.100551	0.0204665	0.00191718
1998	0.0120262	0.062632	0.119855	0.0284679	0.0176616	0.100446	0.0172086	0.00183739
1999	0.0128434	0.0644626	0.12249	0.0279767	0.0194132	0.101435	0.0211686	0.00187277
2000	0.0132355	0.0662129	0.12425	0.0284231	0.0194135	0.103312	0.0225774	0.00196072
2001	0.0130734	0.0686629	0.1203	0.0268211	0.0195385	0.103254	0.0233492	0.0019051
2002	0.0132835	0.073878	0.119721	0.027441	0.0202097	0.104099	0.0239091	0.00187486
2003	0.0140616	0.0777744	0.118311	0.0266101	0.0207197	0.104587	0.0246491	0.00190987
2004	0.0139575	0.0831122	0.116863	0.0286101	0.0213722	0.105704	0.0247251	0.00191277
