# Supplementary material for: Smaller global and regional carbon emissions from gross land use change when considering sub-grid secondary land cohorts in a global dynamic vegetation model
Source: Copernicus journal article supplement (doi:10.5194/bg-2017-329), 2017-09-04
Supplement: Supplementary file 1 [file bg-2017-329-supplement.zip › data/readme.txt]

1. Fig1_Fig3abc_ELUC_datat.xls, unit is Pg C yr-1.
2. In Fig2_ELUC.csv, ORCHIDEE-MICT data are shown as 10-year moving mean, other data are shown as 5-year moving mean. Unit is Pg C yr-1.
