# Supplementary material for: Smaller global and regional carbon emissions from gross land use change when considering sub-grid secondary land cohorts in a global dynamic vegetation model
Source: Copernicus journal article supplement (doi:10.5194/bg-2017-329), 2017-09-04
Supplement: Supplementary file 1 [file Fig1_Fig3abc_ELUC_datat.xls]

## Sheet: No age dynamics
	ELUC_net	ELUC_turnover	ELUC_harvest	ELUC_all
1501	0.0141665	-3.67928e-13	0.0274363	0.0416028
1502	0.0175425	0.00729715	0.0290737	0.0539133
1503	0.0371652	0.00702569	0.0296964	0.0738873
1504	-0.0107177	0.00809957	0.0307236	0.0281055
1505	0.0060094	0.00848568	0.0320585	0.0465536
1506	0.0066623	0.00819762	0.0302713	0.0451312
1507	0.0295336	0.00818452	0.0359578	0.0736759
1508	0.0384602	0.00863528	0.0291559	0.0762513
1509	0.0165373	0.00830506	0.0311855	0.0560278
1510	0.0447992	0.00892323	0.0272016	0.080924
1511	-0.0169076	0.00861034	0.035355	0.0270577
1512	0.0207128	0.00767601	0.0367525	0.0651413
1513	0.047495	0.00873482	0.0415252	0.097755
1514	-0.0175126	0.00817856	0.0224739	0.0131399
1515	0.0106323	0.00882878	0.0317232	0.0511843
1516	0.0184523	0.00872798	0.0286491	0.0558293
1517	0.0315574	0.0101122	0.0337475	0.075417
1518	0.0118958	0.0130861	0.021556	0.0465378
1519	0.0218312	0.00993668	0.04085	0.0726178
1520	-0.00964514	0.00954684	0.0227696	0.0226713
1521	0.0223084	0.0112958	0.0303858	0.06399
1522	0.015158	0.0125936	0.0293985	0.0571502
1523	0.0397621	0.0128362	0.0250928	0.0776912
1524	-0.0140183	0.0154376	0.0249477	0.0263669
1525	-0.0166123	0.0160407	0.016228	0.0156564
1526	-0.0108914	0.0182461	0.0345591	0.0419138
1527	0.00793181	0.0200002	0.029807	0.057739
1528	0.0368473	0.0256308	0.0213325	0.0838106
1529	0.0302886	0.0196202	0.0316648	0.0815737
1530	-0.0106304	0.0233418	0.01498	0.0276913
1531	0.0171764	0.0266131	0.0283407	0.0721303
1532	0.0387287	0.0301285	0.0195149	0.0883721
1533	0.0409166	0.0262918	0.0362472	0.103456
1534	-0.0023118	0.032199	0.0195775	0.0494648
1535	0.0011844	0.0311974	0.0270257	0.0594075
1536	0.000591565	0.0320964	0.0126621	0.04535
1537	0.041832	0.0320719	0.0276347	0.101539
1538	0.0242207	0.0368152	0.0135146	0.0745506
1539	0.0151252	0.0347616	0.0171762	0.067063
1540	0.013702	0.0311866	0.027557	0.0724456
1541	0.024469	0.0356297	0.0148181	0.0749168
1542	0.0123518	0.0381433	0.0222849	0.07278
1543	0.053488	0.0333161	0.0122316	0.0990357
1544	-0.0102331	0.0365562	0.0201647	0.0464879
1545	-0.00930186	0.0422744	0.00257792	0.0355504
1546	-0.00362864	0.0374831	0.0224112	0.0562656
1547	0.0309701	0.0345097	0.0040796	0.0695594
1548	0.00750272	0.0456356	0.023773	0.0769113
1549	0.0264853	0.0406744	0.0222897	0.0894495
1550	-0.0290594	0.0337108	0.0173018	0.0219532
1551	0.0513812	0.0449771	0.0174955	0.113854
1552	0.0398826	0.0450058	0.00523956	0.0901279
1553	-0.00643691	0.0382653	0.0217382	0.0535666
1554	0.00403663	0.0421518	0.0124883	0.0586768
1555	-0.0278739	0.0468407	0.0248889	0.0438557
1556	0.00544159	0.0446141	0.00422779	0.0542835
1557	0.0467922	0.0479256	0.0203554	0.115073
1558	0.0420221	0.0441221	0.0118325	0.0979768
1559	0.021235	0.0433687	0.0170395	0.0816432
1560	-0.0238319	0.0476032	0.0170946	0.0408659
1561	0.071731	0.0501976	0.0152887	0.137217
1562	0.026835	0.0472539	0.0156822	0.0897711
1563	-0.0196214	0.0457155	0.0135658	0.0396599
1564	0.0173349	0.0473325	0.0119344	0.0766017
1565	-0.0357068	0.0498914	0.0139813	0.0281659
1566	-0.00154988	0.0536509	0.0128382	0.0649392
1567	0.06562	0.0388545	0.000108704	0.104583
1568	0.0235553	0.0666618	0.0222958	0.112513
1569	0.0213449	0.0468652	0.00952073	0.0777309
1570	-0.00197292	0.0473005	0.0134892	0.0588168
1571	0.0513708	0.032259	0.0103128	0.0939425
1572	0.0382661	0.0641788	0.00574693	0.108192
1573	0.00379152	0.0475027	0.00628152	0.0575757
1574	0.00386067	0.0467522	0.0179782	0.0685911
1575	-0.0397881	0.0545297	0.0107202	0.0254618
1576	-0.00518798	0.0403012	0.00998533	0.0450985
1577	0.0655529	0.0427162	0.0200543	0.128323
1578	0.0134291	0.0546628	0.00558544	0.0736774
1579	0.0252972	0.0465954	0.0106231	0.0825156
1580	-0.012018	0.0362143	0.0132934	0.0374897
1581	0.0423524	0.0689935	0.00927995	0.120626
1582	0.0555901	0.0318507	0.00326921	0.09071
1583	-0.000803226	0.0417203	0.00250695	0.0434241
1584	0.00669119	0.0425973	0.0126273	0.0619158
1585	-0.0232763	0.0484872	0.00878203	0.033993
1586	-0.00767477	0.0448648	0.0101043	0.0472944
1587	0.0524907	0.0517091	0.00767001	0.11187
1588	0.0116408	0.0480401	0.00972521	0.0694062
1589	0.00292581	0.0419948	0.0159992	0.0609198
1590	-0.00156548	0.0454717	0.00516685	0.0490731
1591	0.0299357	0.0478482	0.0138625	0.0916464
1592	0.0720124	0.0410166	-0.000571331	0.112458
1593	-0.00224415	0.0381458	0.00325408	0.0391557
1594	0.00457844	0.0467958	0.0149527	0.066327
1595	-0.028338	0.0431006	0.00959217	0.0243547
1596	-0.000832418	0.0479845	0.00378098	0.0509331
1597	0.0657215	0.0451393	0.00224482	0.113106
1598	0.00712191	0.0502617	0.00777747	0.0651611
1599	0.00677236	0.0435755	0.00914385	0.0594917
1600	0.0211062	0.0450966	0.00784078	0.0740435
1601	0.0656033	0.0577674	0.00896769	0.132338
1602	0.0321057	0.0493737	0.00953909	0.0910184
1603	0.000319002	0.0567742	0.00585934	0.0629525
1604	0.0121514	0.0516148	0.00694068	0.0707069
1605	-0.0518228	0.0553937	0.00207514	0.00564604
1606	0.00524181	0.0428392	0.0196691	0.0677502
1607	0.0547381	0.051718	0.00905946	0.115515
1608	0.034651	0.0457669	0.00755707	0.087975
1609	0.0112473	0.0437752	0.00855799	0.0635805
1610	-0.0167532	0.0413215	-0.00137001	0.0231983
1611	0.0549561	0.0397319	0.00563694	0.100325
1612	0.0573798	0.0472352	0.000844901	0.10546
1613	-0.00365472	0.0464955	0.00914711	0.0519879
1614	0.0123939	0.0497917	0.00161961	0.0638052
1615	-0.037947	0.0487755	0.0124345	0.023263
1616	0.00230888	0.0363704	-0.00911016	0.0295691
1617	0.0407494	0.041332	0.00190362	0.0839851
1618	0.0258103	0.0470605	-0.00204582	0.070825
1619	0.0106833	0.04053	0.00979588	0.0610092
1620	0.0102545	0.0368823	0.0149359	0.0620728
1621	0.0421824	0.0531096	0.00970777	0.105
1622	0.0737762	0.031524	0.00801582	0.113316
1623	0.0449789	0.0346234	0.00167715	0.0812795
1624	0.00242978	0.0406575	0.00634118	0.0494285
1625	-0.0324571	0.0436054	0.0073299	0.0184782
1626	0.0036879	0.03517	0.01589	0.0547479
1627	0.0696374	0.0407842	0.0107436	0.121165
1628	-0.0207301	0.0365021	0.012482	0.028254
1629	0.0281305	0.0355143	0.00929699	0.0729418
1630	0.0154042	0.0290607	0.00406908	0.0485339
1631	0.066063	0.0299183	0.00583136	0.101813
1632	0.0225049	0.0464974	0.00907678	0.078079
1633	0.049411	0.0524626	0.0104541	0.112328
1634	-0.00809954	0.0349689	0.00719008	0.0340595
1635	-0.0194388	0.03445	0.0161455	0.0311567
1636	0.0162786	0.0226737	-0.0116609	0.0272914
1637	0.0481337	0.0351191	0.000999704	0.0842525
1638	-0.00929732	0.0405651	0.000302846	0.0315707
1639	0.0368933	0.0285442	0.00745002	0.0728875
1640	-0.00719811	0.035068	0.0450494	0.0729193
1641	0.0623716	0.0115399	-0.00223117	0.0716803
1642	0.0612025	0.0429046	0.00527053	0.109378
1643	0.00521325	0.0377702	-0.000615187	0.0423683
1644	0.0113886	0.0309318	0.00441741	0.0467378
1645	-0.0438349	0.0383312	0.0036627	-0.001841
1646	0.0175874	0.0319698	0.0116416	0.0611988
1647	0.0610539	0.0415996	0.00402192	0.106675
1648	0.00342436	0.0417444	0.00289292	0.0480616
1649	0.0138009	0.0356317	0.00970642	0.0591389
1650	0.0326953	0.0189477	0.00014113	0.0517841
1651	0.0596391	0.0294291	0.0120096	0.101078
1652	0.0626904	0.0267671	0.00579706	0.0952546
1653	0.00894403	0.0266099	0.0077902	0.0433442
1654	0.00216114	0.0360859	0.0119691	0.0502162
1655	-0.0399472	0.0331333	0.00471574	-0.00209813
1656	0.00748438	0.0294633	0.00592726	0.042875
1657	0.0525425	0.036154	0.0127232	0.10142
1658	-0.00344888	0.0422621	-0.00341496	0.0353983
1659	0.0330358	0.0369079	0.00209064	0.0720343
1660	0.0076493	0.0490836	0.0422699	0.0990028
1661	0.0547185	0.0469348	-0.00103341	0.10062
1662	0.0617704	0.0242687	0.000871979	0.0869111
1663	0.0300366	0.0482931	0.00710532	0.085435
1664	0.0178234	0.0346499	0.00410471	0.056578
1665	-0.0350298	0.0440201	0.00604228	0.0150326
1666	0.0402126	0.0206182	0.00260651	0.0634373
1667	0.0466893	0.0408609	0.00383856	0.0913887
1668	0.0122506	0.0337244	0.00626373	0.0522388
1669	0.00254403	0.011764	0.00836123	0.0226693
1670	0.017516	0.0505457	0.00571372	0.0737754
1671	0.0458578	0.039261	0.00236908	0.0874878
1672	0.0597847	0.0423039	-0.00315351	0.098935
1673	0.0284231	0.0386569	-0.00173711	0.0653429
1674	0.0194558	0.037522	0.00426334	0.0612412
1675	-0.0539636	0.0296097	-0.000352657	-0.0247066
1676	0.0529837	0.0414275	0.0057066	0.100118
1677	0.0240473	0.047918	0.0185498	0.090515
1678	0.0413173	0.0378965	-0.00841243	0.0708014
1679	0.0321576	0.0202114	0.0047552	0.0571243
1680	-0.00829393	0.047631	0.0376028	0.0769399
1681	0.05686	0.0362083	-0.00317667	0.0898916
1682	0.0179793	0.0350847	0.00395593	0.05702
1683	0.0960346	0.0386995	0.00913969	0.143874
1684	0.0292546	0.0431446	0.00432934	0.0767285
1685	-0.0289593	0.0393581	0.00777191	0.0181707
1686	0.0479359	0.0292273	0.00244102	0.0796042
1687	0.0169219	0.0346683	-0.00566239	0.0459278
1688	0.0212192	0.0532143	0.0116168	0.0860502
1689	0.01182	0.029294	0.00703348	0.0481475
1690	0.0357418	0.05001	-0.00134369	0.0844082
1691	0.0393629	0.0479379	0.00262584	0.0899267
1692	0.0707516	0.0339857	0.00379766	0.108535
1693	0.0504112	0.0403138	0.00423578	0.0949607
1694	0.0148183	0.0277161	0.00637331	0.0489077
1695	-0.0557157	0.0416318	0.001634	-0.0124499
1696	0.0647279	0.0199137	0.00906587	0.0937075
1697	0.0281693	0.0339129	0.0116092	0.0736914
1698	0.0373273	0.0499789	-0.00313096	0.0841752
1699	0.0286287	0.0276832	0.00424779	0.0605597
1700	0.012692	0.0401191	0.0390449	0.091856
1701	0.0399139	0.0628175	-0.00406512	0.0986663
1702	0.0537957	0.00809068	0.00135258	0.063239
1703	0.119069	0.0305613	0.00930887	0.158939
1704	0.0404096	0.0336166	0.00196668	0.0759929
1705	-0.00475594	0.0279604	0.00443757	0.027642
1706	0.0793235	0.0245311	0.00452938	0.108384
1707	0.033077	0.0183478	-0.00330048	0.0481243
1708	0.0536017	0.0414502	0.00432871	0.0993806
1709	0.00544434	0.00844323	0.00952389	0.0234115
1710	-0.00297626	0.0297056	0.00266218	0.0293916
1711	0.0756605	0.0169873	0.0093276	0.101975
1712	0.0478684	0.0206191	0.0110449	0.0795324
1713	0.0861449	0.0245694	-0.00164744	0.109067
1714	0.055578	0.00334789	-0.000533952	0.0583919
1715	-0.00939803	0.013465	-0.00109951	0.00296749
1716	0.0998941	0.00151632	0.0118075	0.113218
1717	0.0272902	0.00627717	0.0130089	0.0465763
1718	0.106423	0.0203365	0.0101205	0.13688
1719	-0.0132981	0.004513	0.00257698	-0.00620811
1720	0.00989763	0.0176496	0.0358182	0.0633654
1721	0.0585928	-0.00114233	0.00137392	0.0588244
1722	0.0362283	0.0181628	0.00436006	0.0587511
1723	0.0573142	0.0216721	0.00973391	0.0887202
1724	0.0653179	0.0157261	0.00715276	0.0881968
1725	-0.0506692	0.0164276	0.0125767	-0.021665
1726	0.0903914	0.0102993	0.00264161	0.103332
1727	0.0387575	0.00319124	0.0152368	0.0571855
1728	0.0549794	0.0454107	0.00143572	0.101826
1729	0.0230782	0.00641682	0.00672391	0.0362189
1730	0.0151806	0.0290369	-0.00225177	0.0419658
1731	0.0726317	0.0201598	0.00874012	0.101532
1732	0.0479597	0.0324932	0.000107173	0.0805601
1733	0.0789247	0.0270856	0.00415442	0.110165
1734	0.0804589	0.0231628	0.0108871	0.114509
1735	-0.0472937	0.0310111	0.00464803	-0.0116346
1736	0.0775297	0.00341235	0.0213655	0.102308
1737	0.0663846	0.0198402	0.005274	0.0914988
1738	0.0835206	0.0477608	0.0107494	0.142031
1739	0.0430093	0.0237625	0.0188207	0.0855925
1740	0.00238735	0.0459783	0.00772504	0.0560906
1741	0.0920564	0.0378011	0.0163496	0.146207
1742	0.0498933	0.0272511	0.0138919	0.0910363
1743	0.114937	0.0376118	0.0124407	0.164989
1744	0.0863412	0.0391039	0.00838336	0.133828
1745	-0.0222742	0.0248691	0.0110961	0.013691
1746	0.0370313	0.018532	0.011906	0.0674693
1747	0.127805	0.0299489	0.00986311	0.167617
1748	0.134964	0.0259345	0.0122748	0.173173
1749	0.0354385	0.016444	0.0171191	0.0690016
1750	0.0343439	0.0432749	0.0109488	0.0885676
1751	0.0864006	0.0356633	0.0127956	0.134859
1752	0.0896548	0.0356634	0.0136859	0.139004
1753	0.136381	0.0209766	0.0182395	0.175597
1754	0.103536	0.0397424	0.0108729	0.154151
1755	-0.0214441	0.0356791	0.0134836	0.0277185
1756	0.0716735	0.0369434	0.00656593	0.115183
1757	0.152911	0.0274628	0.0197758	0.20015
1758	0.0727836	0.0476145	0.013315	0.133713
1759	0.0596929	0.0412374	0.0157754	0.116706
1760	0.030328	0.0486398	0.00563194	0.0845998
1761	0.0954565	0.0462828	0.0128624	0.154602
1762	0.0869765	0.0433025	0.00361207	0.133891
1763	0.113392	0.0415128	0.0232685	0.178174
1764	0.14447	0.048547	0.010845	0.203862
1765	-0.0491012	0.0358871	0.0331332	0.0199192
1766	0.07456	0.0362026	-0.0032776	0.107485
1767	0.110737	0.0477978	0.00902005	0.167555
1768	0.138867	0.0593803	0.0169366	0.215184
1769	0.0482981	0.0328031	0.014328	0.0954292
1770	0.0836218	0.0461602	0.02131	0.151092
1771	0.0994886	0.0357535	0.0190309	0.154273
1772	0.114468	0.0431434	0.0180769	0.175688
1773	0.151979	0.0591338	0.016034	0.227147
1774	0.166532	0.0400492	0.0194663	0.226048
1775	-0.0110655	0.0447162	0.0245202	0.0581709
1776	0.120528	0.0433655	0.0236789	0.187572
1777	0.168929	0.0692939	0.00105297	0.239276
1778	0.195754	0.0455701	0.0185627	0.259887
1779	0.0954572	0.0491004	0.0263859	0.170944
1780	0.123789	0.0445992	0.0107147	0.179103
1781	0.0926699	0.0483645	0.0192006	0.160235
1782	0.112903	0.067009	0.0195657	0.199477
1783	0.19843	0.0591895	0.0253262	0.282945
1784	0.167158	0.0577669	0.021383	0.246308
1785	-0.0103369	0.035355	0.0282765	0.0532945
1786	0.163093	0.0650722	0.0123062	0.240471
1787	0.167412	0.0428005	0.0196598	0.229873
1788	0.190532	0.0908946	0.0143118	0.295739
1789	0.0642045	0.062008	0.0293477	0.15556
1790	0.103173	0.0562204	0.0158034	0.175196
1791	0.0838264	0.0470645	0.0198293	0.15072
1792	0.100516	0.056959	0.00873257	0.166208
1793	0.181437	0.0716232	0.0349336	0.287993
1794	0.188363	0.0631044	0.00979692	0.261264
1795	-0.0559019	0.0719496	0.0359923	0.05204
1796	0.138306	0.05679	-0.00629226	0.188804
1797	0.134888	0.0525589	0.0278415	0.215288
1798	0.15157	0.0755658	0.00651714	0.233653
1799	0.084894	0.0739781	0.0318836	0.190756
1800	0.0852001	0.0575461	0.0109967	0.153743
1801	0.0949016	0.0609619	0.0181175	0.173981
1802	0.138033	0.0570476	0.0141069	0.209188
1803	0.191747	0.0678633	0.0170807	0.276691
1804	0.192951	0.0611311	0.0255051	0.279588
1805	-0.024125	0.0481122	0.0292507	0.0532378
1806	0.137711	0.0806977	0.0105921	0.229
1807	0.169219	0.0702321	0.0202115	0.259663
1808	0.184075	0.0723462	0.0285893	0.28501
1809	0.128274	0.0459372	0.00722313	0.181435
1810	0.138485	0.0674452	0.0227644	0.228695
1811	0.137226	0.0614224	0.0267189	0.225367
1812	0.165713	0.0692728	0.0390429	0.274028
1813	0.207691	0.0811512	0.0191088	0.307951
1814	0.212038	0.0552744	0.0208389	0.288151
1815	-0.0457541	0.086599	0.0284005	0.0692454
1816	0.167515	0.0477007	0.0240143	0.23923
1817	0.175529	0.0938398	0.015777	0.285146
1818	0.165377	0.0683883	0.03019	0.263955
1819	0.127782	0.0772987	0.020862	0.225943
1820	0.129888	0.0726794	0.0348128	0.23738
1821	0.177181	0.0740036	0.00812104	0.259306
1822	0.187527	0.0714137	0.0248093	0.28375
1823	0.230418	0.0739654	0.0106542	0.315038
1824	0.264692	0.0749829	0.0166535	0.356328
1825	0.00179588	0.093982	0.0186619	0.11444
1826	0.196833	0.0846633	0.0249777	0.306474
1827	0.235507	0.108471	0.0238321	0.36781
1828	0.227032	0.111556	0.0172324	0.35582
1829	0.206058	0.0687685	0.0229655	0.297792
1830	0.159126	0.103458	0.0260488	0.288633
1831	0.225844	0.0954398	0.0172611	0.338545
1832	0.234868	0.096715	0.053955	0.385538
1833	0.313643	0.0927385	0.0274648	0.433847
1834	0.286082	0.1056	0.0203379	0.412021
1835	0.0629889	0.0996336	0.0356125	0.198235
1836	0.236137	0.0854423	0.0207285	0.342308
1837	0.297155	0.112216	0.037123	0.446494
1838	0.266398	0.0947419	0.0310982	0.392238
1839	0.247478	0.0767178	0.0334272	0.357623
1840	0.233997	0.100759	0.0366872	0.371443
1841	0.241995	0.0921753	0.0287661	0.362937
1842	0.270529	0.0948174	0.00733919	0.372685
1843	0.356345	0.0855472	0.031024	0.472916
1844	0.359481	0.0858061	0.0309486	0.476236
1845	0.0753262	0.0801426	0.0334402	0.188909
1846	0.280065	0.0739986	0.0232614	0.377325
1847	0.329168	0.0974581	0.0406565	0.467283
1848	0.317503	0.0846761	0.0162864	0.418466
1849	0.295235	0.0534906	0.0389178	0.387644
1850	0.219908	0.106736	0.0275687	0.354213
1851	0.301452	0.0589677	0.0461447	0.406565
1852	0.290388	0.0973977	0.0450367	0.432823
1853	0.393366	0.0732522	0.0283852	0.495004
1854	0.417876	0.0735157	0.0407695	0.532161
1855	0.111982	0.0786497	0.0324814	0.223113
1856	0.337315	0.0659898	0.0371611	0.440466
1857	0.410173	0.0746628	0.038155	0.522991
1858	0.359617	0.0978718	0.0332107	0.490699
1859	0.348176	0.0523038	0.0506322	0.451112
1860	0.302985	0.0938712	0.0365035	0.433359
1861	0.279849	0.0753045	0.0471153	0.402269
1862	0.305572	0.0879236	0.0430316	0.436527
1863	0.405787	0.0887056	0.036487	0.530979
1864	0.343119	0.0725221	0.0612672	0.476909
1865	0.0603193	0.0858498	0.0381798	0.184349
1866	0.254194	0.0533315	0.060761	0.368286
1867	0.359982	0.0853073	0.0429414	0.488231
1868	0.325909	0.0680916	0.0534194	0.44742
1869	0.275708	0.0606629	0.0497209	0.386091
1870	0.195924	0.076411	0.049225	0.32156
1871	0.28065	0.0584403	0.0531801	0.39227
1872	0.32568	0.0999794	0.0368418	0.462501
1873	0.468355	0.0605438	0.0364948	0.565394
1874	0.441185	0.0646927	0.0537789	0.559657
1875	0.157906	0.0642485	0.0306863	0.252841
1876	0.375714	0.0530007	0.0523273	0.481042
1877	0.467659	0.0816363	0.0430872	0.592383
1878	0.482343	0.05184	0.0477748	0.581958
1879	0.432516	0.0557558	0.045203	0.533475
1880	0.410562	0.0424832	0.0428628	0.495908
1881	0.355216	0.0410181	0.0511324	0.447366
1882	0.417545	0.0656635	0.0658253	0.549034
1883	0.524037	0.0877541	0.0453646	0.657155
1884	0.507414	0.0628007	0.0612132	0.631428
1885	0.22385	0.0540606	0.0529593	0.33087
1886	0.410662	0.0538515	0.0667724	0.531286
1887	0.537673	0.0572729	0.063229	0.658175
1888	0.538416	0.0871019	0.0603617	0.685879
1889	0.517149	0.0610235	0.0556147	0.633787
1890	0.461087	0.0979218	0.0756136	0.634623
1891	0.39821	0.0868014	0.0646559	0.549668
1892	0.44775	0.106145	0.0595447	0.61344
1893	0.652727	0.0884969	0.049281	0.790505
1894	0.592816	0.0931635	0.0633438	0.749323
1895	0.306467	0.0940059	0.0386856	0.439158
1896	0.520415	0.0871221	0.0725342	0.680071
1897	0.578481	0.0948005	0.0651435	0.738425
1898	0.649012	0.0939727	0.0569633	0.799948
1899	0.60255	0.0699233	0.0656594	0.738133
1900	0.539359	0.121845	0.0482424	0.709446
1901	0.412355	0.0653673	0.0744145	0.552136
1902	0.566765	0.10632	0.0811962	0.754281
1903	0.717983	0.0669707	0.0792603	0.864214
1904	0.676062	0.10205	0.0793891	0.857501
1905	0.367332	0.0608715	0.0728304	0.501034
1906	0.562026	0.10661	0.0734029	0.742039
1907	0.661126	0.0807805	0.0816506	0.823557
1908	0.639784	0.106601	0.0750623	0.821447
1909	0.637888	0.0761179	0.0758305	0.789837
1910	0.566374	0.0800852	0.0811729	0.727632
1911	0.418979	0.105605	0.0848178	0.609402
1912	0.361563	0.096278	0.0988414	0.556683
1913	0.609502	0.105216	0.0827335	0.797452
1914	0.587039	0.102405	0.100953	0.790397
1915	0.431869	0.102215	0.0934043	0.627488
1916	0.524577	0.0917553	0.101718	0.718051
1917	0.60255	0.109823	0.104416	0.816789
1918	0.46201	0.102995	0.0971536	0.662159
1919	0.278761	0.136132	0.0876219	0.502516
1920	0.323741	0.113519	0.0949542	0.532214
1921	0.460382	0.131493	0.0985857	0.690461
1922	0.479727	0.145513	0.0969902	0.722229
1923	0.623934	0.130134	0.111101	0.865169
1924	0.470986	0.135603	0.109301	0.71589
1925	0.485678	0.124222	0.108066	0.717966
1926	0.588689	0.14752	0.114029	0.850238
1927	0.444063	0.158156	0.102695	0.704914
1928	0.611053	0.14982	0.105703	0.866575
1929	0.586204	0.145236	0.112867	0.844308
1930	0.51804	0.156556	0.103247	0.777843
1931	0.678005	0.136152	0.110229	0.924387
1932	0.583434	0.13314	0.111747	0.828321
1933	0.832871	0.148226	0.115683	1.09678
1934	0.70736	0.180226	0.102442	0.990028
1935	0.781384	0.191767	0.103193	1.07634
1936	0.667874	0.174749	0.104967	0.94759
1937	0.803709	0.210454	0.112554	1.12672
1938	0.472257	0.211974	0.111523	0.795753
1939	0.883635	0.188771	0.109485	1.18189
1940	0.84406	0.203478	0.10921	1.15675
1941	1.16548	0.174349	0.120562	1.46039
1942	1.01873	0.181245	0.13354	1.33352
1943	0.943602	0.203622	0.122733	1.26996
1944	0.754387	0.184329	0.123366	1.06208
1945	0.970929	0.172454	0.125253	1.26864
1946	0.853185	0.225053	0.134826	1.21306
1947	1.15911	0.21939	0.12815	1.50665
1948	0.914441	0.249142	0.132379	1.29596
1949	0.751642	0.248192	0.148566	1.1484
1950	0.871648	0.236774	0.14266	1.25108
1951	0.852083	0.249386	0.144398	1.24587
1952	1.05237	0.226322	0.155621	1.43431
1953	0.755062	0.296699	0.137919	1.18968
1954	1.10327	0.337375	0.164853	1.6055
1955	1.18778	0.296002	0.166193	1.64997
1956	1.19111	0.313279	0.17249	1.67687
1957	0.828086	0.356003	0.170208	1.3543
1958	0.918778	0.354676	0.188921	1.46238
1959	1.08208	0.341113	0.191064	1.61425
1960	1.17478	0.35906	0.198596	1.73243
1961	0.619117	0.476322	0.199266	1.2947
1962	0.820771	0.439044	0.218615	1.47843
1963	0.757761	0.44482	0.215383	1.41796
1964	0.687001	0.458345	0.223895	1.36924
1965	0.558646	0.408097	0.227083	1.19383
1966	0.633361	0.42689	0.231628	1.29188
1967	0.633457	0.414653	0.220598	1.26871
1968	0.969624	0.407292	0.225907	1.60282
1969	0.824592	0.375214	0.220917	1.42072
1970	0.811572	0.374291	0.220144	1.40601
1971	0.749352	0.409883	0.228448	1.38768
1972	0.764417	0.3484	0.222785	1.3356
1973	0.828956	0.364137	0.221712	1.41481
1974	1.03009	0.36031	0.228482	1.61889
1975	0.765277	0.374789	0.235077	1.37514
1976	1.21912	0.319249	0.239124	1.77749
1977	0.751797	0.338925	0.249512	1.34023
1978	1.03406	0.321099	0.261363	1.61652
1979	0.834228	0.323736	0.269004	1.42697
1980	0.823809	0.340785	0.295363	1.45996
1981	0.764675	0.305636	0.282305	1.35262
1982	1.17582	0.343789	0.283597	1.80321
1983	0.658944	0.341098	0.282022	1.28206
1984	1.29603	0.340269	0.287706	1.924
1985	1.21515	0.313276	0.341245	1.86967
1986	1.04819	0.331167	0.361762	1.74112
1987	1.03495	0.369232	0.348413	1.7526
1988	0.780414	0.330533	0.354169	1.46512
1989	1.43207	0.32396	0.358189	2.11421
1990	1.26539	0.365102	0.363762	1.99425
1991	0.718809	0.369447	0.349391	1.43765
1992	1.01851	0.421808	0.366867	1.80719
1993	1.27102	0.335724	0.363774	1.97052
1994	0.672541	0.396993	0.347869	1.4174
1995	0.596918	0.371469	0.340012	1.3084
1996	1.13599	0.384312	0.351907	1.87221
1997	0.976408	0.352072	0.350999	1.67948
1998	0.755886	0.379053	0.326373	1.46131
1999	1.11473	0.337863	0.336871	1.78947
2000	1.10577	0.358092	0.369633	1.83349
2001	0.835059	0.327558	0.354451	1.51707
2002	0.535718	0.333558	0.341123	1.2104
2003	0.844736	0.310317	0.335231	1.49028
2004	0.968902	0.314386	0.333274	1.61656
2005	0.921365	0.323368	0.342861	1.58759

## Sheet: With age dynamics
	ELUC_net	ELUC_turnover	ELUC_harvest	ELUC_all
1501	0.0124366	0	0.0306592	0.0430958
1502	-0.0170951	0.00861091	0.0285422	0.020058
1503	0.0273256	0.00761776	0.030727	0.0656703
1504	0.00502714	0.00636136	0.0281962	0.0395847
1505	0.00531647	0.00725124	0.0284443	0.041012
1506	-0.0248853	0.00698433	0.0293353	0.0114343
1507	0.0347768	0.00664549	0.0362394	0.0776617
1508	0.019465	0.00897689	0.0303321	0.058774
1509	0.0054885	0.00757319	0.0358513	0.048913
1510	0.0261069	0.00656999	0.0357744	0.0684514
1511	0.00838314	0.0066314	0.0316093	0.0466239
1512	-0.0191682	0.0062591	0.0341876	0.0212785
1513	0.0402966	0.00513678	0.0345598	0.0799932
1514	0.00224097	0.0060205	0.0326386	0.0409001
1515	0.00724974	0.00599625	0.0312989	0.0445448
1516	-0.0390487	0.00534883	0.0329861	-0.000713868
1517	0.0377078	0.0056054	0.0358437	0.0791569
1518	0.0146394	0.00456618	0.029921	0.0491265
1519	0.0263199	0.00386814	0.024342	0.05453
1520	0.0271722	0.00628878	0.0316064	0.0650674
1521	0.019525	0.00230463	0.0314866	0.0533163
1522	0.0017827	-0.00723549	0.0257356	0.0202828
1523	0.0167575	0.0093874	0.0250897	0.0512345
1524	0.0144815	0.000454285	0.03275	0.0476858
1525	-0.00759596	0.0109056	0.0321409	0.0354505
1526	-0.0548719	0.00263096	0.0255605	-0.0266805
1527	0.0338301	0.0172773	0.0298715	0.0809789
1528	0.00630671	0.0151379	0.0291877	0.0506323
1529	0.014156	0.00642615	0.0181159	0.038698
1530	-0.018599	0.0127442	0.0285961	0.0227413
1531	0.0317751	0.010442	0.0215283	0.0637455
1532	-0.0197275	0.0146178	0.0237877	0.0186779
1533	0.0114838	0.0203831	0.0279615	0.0598284
1534	0.00722984	0.0225105	0.0161222	0.0458625
1535	-0.015021	0.0222771	0.0248427	0.0320989
1536	-0.0527847	0.0211847	0.014787	-0.016813
1537	0.0200078	0.0113072	0.0225717	0.0538868
1538	0.0181544	0.0197763	0.026075	0.0640057
1539	0.0211241	0.0238395	0.020737	0.0657007
1540	-0.000222726	0.023557	0.0186072	0.0419415
1541	0.0232601	0.0181735	0.0163628	0.0577964
1542	-0.0128602	0.0023208	0.0207618	0.0102224
1543	0.0749056	0.00902971	0.0118725	0.0958078
1544	0.00405597	0.00936832	0.0306288	0.0440531
1545	-0.0135781	0.0165203	0.0164399	0.0193821
1546	-0.0517649	0.0132142	0.0198832	-0.0186675
1547	0.046311	0.00398842	0.0186404	0.0689399
1548	0.00464006	0.026887	0.0129809	0.0445079
1549	0.00238403	0.010379	0.0217049	0.034468
1550	0.0155468	0.0188784	0.0266078	0.061033
1551	-0.00369907	0.0178209	0.0119831	0.0261049
1552	0.00483254	0.0112645	0.00767091	0.0237679
1553	0.0307409	0.00933301	0.0157525	0.0558265
1554	0.00891855	0.0125747	0.0122409	0.0337341
1555	-0.0335265	0.0240606	0.0189594	0.00949357
1556	-0.0269541	0.0241978	-0.00534756	-0.00810383
1557	0.0755502	0.00687708	0.0108046	0.0932318
1558	0.0466143	0.0254322	0.0281614	0.100208
1559	-0.0116565	0.0345761	0.0269988	0.0499184
1560	-0.0207964	0.00460332	0.020064	0.00387088
1561	0.0270226	0.0244974	0.0278753	0.0793953
1562	0.016774	0.0301077	0.0104348	0.0573165
1563	0.0314791	0.0159729	0.0181932	0.0656452
1564	0.0135062	0.0250966	0.00137671	0.0399795
1565	0.00177059	0.0237234	0.0262566	0.0517506
1566	-0.0411106	0.0167133	0.004848	-0.0195494
1567	0.0378892	0.0202813	0.0265237	0.0846941
1568	0.0801837	0.0183338	-0.00262635	0.0958911
1569	-0.000306505	0.0419435	0.0105522	0.0521891
1570	-0.0148106	0.0104321	0.0209233	0.0165448
1571	0.0598392	0.0234726	0.0147321	0.0980439
1572	-0.0128787	0.00779437	0.028959	0.0238747
1573	-0.0153934	0.021431	0.0110488	0.0170864
1574	0.0124988	0.0270419	0.0134257	0.0529664
1575	-0.0290758	0.0224597	0.0138313	0.00721528
1576	-0.025939	0.00789724	0.00363085	-0.0144109
1577	0.0578692	0.0319689	0.0024457	0.0922838
1578	0.0505607	0.0230833	0.024859	0.098503
1579	-0.00743024	0.0268072	0.017902	0.037279
1580	-0.00613353	0.00975215	0.00610947	0.00972809
1581	0.0573504	0.0123909	0.0223357	0.092077
1582	0.0299156	-0.00179677	0.0123716	0.0404904
1583	-0.00429413	0.0121998	0.0124038	0.0203095
1584	0.013681	0.0318678	-0.00581019	0.0397386
1585	-0.0443149	0.0321667	0.0220318	0.00988357
1586	-0.0579708	0.00788116	0.0056403	-0.0444493
1587	0.0601599	0.0303552	0.020381	0.110896
1588	0.0233284	0.0274377	-0.00119141	0.0495747
1589	0.0313794	0.0272641	0.00395338	0.0625969
1590	-0.0110664	0.000900249	0.0159435	0.00577732
1591	0.0289075	0.0427414	0.00824346	0.0798924
1592	0.0130376	-0.0151354	0.0112769	0.00917902
1593	0.00559838	0.00996851	0.00407863	0.0196455
1594	0.00973123	0.0191671	0.0124823	0.0413807
1595	-0.0334829	0.0233138	-0.00459443	-0.0147635
1596	-0.0441777	0.0182306	0.011469	-0.0144781
1597	0.0926222	0.038616	0.00337223	0.13461
1598	0.003771	0.0445439	0.0189821	0.0672969
1599	0.00679059	0.0448889	0.00363807	0.0553175
1600	0.0129849	0.00394574	-0.00122712	0.0157035
1601	0.0608499	-0.00994265	0.00911372	0.060021
1602	0.0191417	0.0155639	0.00535783	0.0400634
1603	0.00406155	0.0143016	0.0104732	0.0288363
1604	0.0199569	0.0311393	0.000213691	0.0513098
1605	-0.0368074	0.0419022	0.0174047	0.0224995
1606	-0.0393975	0.0222376	0.00511556	-0.0120443
1607	0.07189	0.0474644	0.00308014	0.122435
1608	0.0686193	0.00856729	0.0189603	0.0961469
1609	0.00609456	0.0120943	0.00567067	0.0238595
1610	-0.0347822	0.0253984	0.0114017	0.00201781
1611	0.0394035	0.0164373	0.000894561	0.0567354
1612	0.0310327	-0.00780023	0.0117641	0.0349966
1613	0.00378387	0.0106565	0.00492473	0.0193651
1614	0.0102101	0.0144226	0.00941072	0.0340434
1615	-0.0233026	0.024751	0.00524216	0.00669057
1616	-0.0488233	0.0324298	0.00723208	-0.00916147
1617	0.0519627	0.0237347	0.0127448	0.0884422
1618	0.0520166	0.0253966	0.015503	0.0929163
1619	-0.0186675	0.0380757	0.00286285	0.022271
1620	0.017163	-0.0124832	0.000994277	0.00567402
1621	0.0627629	0.0242073	0.0118552	0.0988254
1622	0.0771501	-0.0206983	0.00722138	0.0636732
1623	0.0237481	0.00987775	0.00661871	0.0402445
1624	0.0087982	-2.19907e-05	0.0107718	0.019548
1625	-0.0386596	0.0246849	0.0114473	-0.00252744
1626	-0.0225416	0.00215077	-0.00299921	-0.0233901
1627	0.0471049	0.00970661	0.00554058	0.0623521
1628	-0.00396112	0.0189406	0.0188339	0.0338134
1629	0.0672041	0.0250994	0.0083829	0.100686
1630	0.0199646	-0.00259854	0.0131838	0.0305499
1631	0.0221346	0.00411407	0.00214045	0.0283892
1632	0.0315334	0.00189461	0.00434877	0.0377768
1633	0.0474022	0.00351152	0.010361	0.0612748
1634	0.0133506	0.0103431	0.00726458	0.0309583
1635	-0.045264	0.0206546	0.0165381	-0.00807133
1636	-0.0209188	-0.0105115	0.00521331	-0.026217
1637	0.0681197	0.0122519	0.0184859	0.0988575
1638	0.0179836	0.0100914	0.012349	0.040424
1639	0.0196847	0.023112	0.00496885	0.0477656
1640	0.00384155	0.0273813	-0.0204692	0.0107537
1641	0.0644745	-0.00628112	0.0126781	0.0708715
1642	0.0578668	-0.00465594	0.011496	0.0647068
1643	0.0394351	-0.0039848	-0.00316448	0.0322858
1644	0.0116068	0.0117455	-0.00602429	0.0173281
1645	-0.0262943	0.029938	0.00976079	0.0134045
1646	-0.0395168	0.0228826	0.00913949	-0.0074947
1647	0.0869316	0.0198019	0.0026976	0.109431
1648	-0.00505154	0.0257146	0.00546396	0.026127
1649	0.0686623	0.0261435	0.0110126	0.105818
1650	-0.00603778	0.00945398	-0.00820096	-0.00478477
1651	0.0670994	0.0110914	0.00870363	0.0868944
1652	0.0223001	-0.00432443	0.00322732	0.021203
1653	0.0477848	0.024664	0.00109456	0.0735434
1654	0.0231072	0.0165845	-0.00107928	0.0386125
1655	-0.0515974	0.0450105	0.011517	0.00492997
1656	-0.0261792	0.0212442	-0.0183318	-0.0232667
1657	0.0632972	0.0241071	0.00876818	0.0961725
1658	0.00446492	0.0243448	0.0103054	0.0391151
1659	0.0318535	0.0282195	0.0057053	0.0657783
1660	0.0259269	0.0346396	-0.0279705	0.032596
1661	0.040697	0.00175584	0.0145237	0.0569766
1662	0.0485006	-0.01109	0.00458115	0.0419918
1663	0.0856939	0.018078	0.00594939	0.109721
1664	0.0125716	0.00446127	0.0121266	0.0291594
1665	-0.0457584	0.037604	0.0170104	0.00885602
1666	-0.0245285	0.0272937	-0.00773599	-0.0049708
1667	0.0616311	0.0283783	0.0049364	0.0949458
1668	0.0291838	0.0334087	-0.00569177	0.0569008
1669	0.0358676	0.0349945	0.00854421	0.0794063
1670	0.0183874	-0.00677352	0.0053042	0.0169181
1671	0.0448845	0.0157415	-0.00617862	0.0544474
1672	0.027617	-0.0126942	0.0116987	0.0266215
1673	0.0978454	0.00960579	0.00412714	0.111578
1674	-0.000594421	0.0152557	0.0160404	0.0307017
1675	-0.0425384	0.0207946	-0.00393014	-0.025674
1676	-0.0487649	0.00827177	0.0197686	-0.0207246
1677	0.087493	-0.000272447	0.00783399	0.0950546
1678	0.023301	0.0172971	0.0152092	0.0558072
1679	0.0261461	0.0431762	0.00662359	0.0759459
1680	0.0247121	0.0150914	0.00583973	0.0456432
1681	0.051963	0.00614653	0.0135315	0.071641
1682	0.0346355	0.024935	0.00067903	0.0602496
1683	0.0734978	0.0363448	0.00367887	0.113521
1684	-0.0065559	0.0188729	-0.00215795	0.010159
1685	-0.0489055	0.0429959	0.00803351	0.00212388
1686	-0.0197705	0.00932006	0.00940015	-0.00105032
1687	0.0815985	0.0047809	0.0163346	0.102714
1688	0.0220786	0.0496731	0.00328473	0.0750365
1689	0.0394669	0.0471782	0.00118528	0.0878303
1690	0.0109223	0.0115196	0.00573745	0.0281794
1691	0.0421636	0.0225125	0.00788159	0.0725578
1692	0.0250253	0.00689775	-0.000458722	0.0314644
1693	0.129239	0.0235608	0.0171244	0.169925
1694	0.00730105	0.0266612	-0.00814408	0.0258182
1695	-0.0316534	0.015964	0.0255954	0.009906
1696	-0.0313417	0.00721016	-0.00476495	-0.0288964
1697	0.0473505	-0.017653	0.0149634	0.0446608
1698	0.020907	0.0161103	0.000977222	0.0379945
1699	0.0274875	0.0136651	0.00657959	0.0477323
1700	0.0179324	-0.0170544	0.0113281	0.0122061
1701	0.0700091	-0.00683706	0.0185099	0.081682
1702	0.0321747	0.00249992	0.00364331	0.0383179
1703	0.131618	0.0236881	-0.00260588	0.1527
1704	0.0168751	-0.0106203	0.0146094	0.0208642
1705	-0.0159561	0.00791991	0.025552	0.0175159
1706	0.00657475	-0.0202472	0.00125112	-0.0124214
1707	0.0801927	-0.0168016	0.0102213	0.0736124
1708	0.0359317	-0.00696929	0.00842463	0.037387
1709	0.070855	-0.00997436	-0.00162216	0.0592585
1710	-0.0285693	-0.0380441	0.0162168	-0.0503966
1711	0.0930588	-0.0174478	0.00822977	0.0838408
1712	0.013532	-0.0571006	0.0206697	-0.0228988
1713	0.137369	-0.014572	0.0147522	0.13755
1714	0.0504877	-0.0302071	0.00284391	0.0231246
1715	-0.00258024	-0.0101658	0.0171089	0.00436284
1716	0.0274186	-0.011753	-0.00290134	0.0127643
1717	0.0822469	-0.0419719	0.017306	0.057581
1718	0.0733845	0.0108883	0.00932748	0.0936004
1719	0.025962	0.00300757	0.00806692	0.0370365
1720	-0.0183094	-0.0218931	0.0108675	-0.029335
1721	0.0645473	-0.0278528	0.00839826	0.0450928
1722	0.00917571	-0.0183336	0.0208541	0.0116963
1723	0.116505	-0.00874383	0.0242114	0.131973
1724	0.0386721	-0.00300841	-0.00106756	0.0345961
1725	-0.0437579	0.00322717	0.0177079	-0.0228229
1726	0.0213531	-6.11152e-05	-0.00170914	0.0195829
1727	0.0920751	0.0024871	0.00317049	0.0977327
1728	0.0932999	-0.000221107	0.0082767	0.101356
1729	0.0264563	0.019869	0.0048012	0.0511265
1730	0.0133596	-0.0249781	0.0133804	0.00176196
1731	0.0543533	-0.00528718	0.00749529	0.0565614
1732	0.0118606	-0.00899826	0.00184244	0.00470479
1733	0.137617	0.00255378	0.00985212	0.150023
1734	0.0482213	0.015893	0.0020219	0.0661362
1735	-0.0179303	0.0118439	0.0183146	0.0122282
1736	-0.00623933	0.001334	-0.00409397	-0.0089993
1737	0.1056	0.010283	0.0222364	0.138119
1738	0.067451	0.0224739	-0.0027842	0.0871407
1739	0.0198529	0.00836276	0.0230089	0.0512246
1740	0.00572181	-0.0156183	0.00880623	-0.00109029
1741	0.116915	0.00345334	0.0157396	0.136108
1742	0.050475	-0.00402748	0.0052088	0.0516563
1743	0.140403	0.0163994	0.00977016	0.166573
1744	0.0673052	-0.00437815	0.0243502	0.0872772
1745	-0.0156354	0.0262883	0.0252873	0.0359402
1746	0.0310643	-0.0213611	0.00575792	0.0154611
1747	0.123634	-0.00426146	0.0283188	0.147692
1748	0.1286	-0.0111947	0.0148764	0.132282
1749	0.044291	0.022303	0.0114224	0.0780165
1750	0.0440479	-0.0329031	0.0182847	0.0294296
1751	0.0896574	0.000427513	0.000389483	0.0904744
1752	0.0518752	-0.0230462	0.0246247	0.0534536
1753	0.142977	-0.0120079	0.0256082	0.156577
1754	0.0960421	0.00325009	-0.00199755	0.0972946
1755	-0.0317643	-0.00258026	0.0260692	-0.00827541
1756	0.0682651	0.0169232	0.00982848	0.0950168
1757	0.147399	-0.0144112	0.0268943	0.159882
1758	0.0947351	0.0420986	0.0243042	0.161138
1759	0.0293117	0.0303197	0.0147158	0.0743472
1760	0.0224795	0.0100876	0.01843	0.0509971
1761	0.105474	0.0183416	0.0100472	0.133863
1762	0.085215	0.00634832	0.0190736	0.110637
1763	0.153259	0.0456369	0.0142944	0.213191
1764	0.11917	0.0221879	0.00667818	0.148036
1765	-0.0317162	0.0345213	0.0319739	0.034779
1766	0.077725	-0.0192749	0.0263919	0.084842
1767	0.152349	0.00272497	0.0179394	0.173013
1768	0.116483	0.041377	0.0225944	0.180454
1769	0.0539243	0.0506814	0.0159678	0.120573
1770	0.0575964	-0.0123305	0.0261955	0.0714614
1771	0.0990758	-0.000675509	0.0166649	0.115065
1772	0.0923717	0.0110757	0.0177006	0.121148
1773	0.191752	0.0484716	0.0120391	0.252263
1774	0.153142	0.0376152	0.0157762	0.206533
1775	-0.0245816	0.050754	0.00181793	0.0279902
1776	0.118924	0.0173906	0.0386752	0.174989
1777	0.182482	0.00329035	0.0315123	0.217284
1778	0.16811	0.0560355	0.0295485	0.253694
1779	0.118299	0.0485506	0.0215331	0.188383
1780	0.0919583	-0.0100346	0.0189315	0.100855
1781	0.0738901	0.0201423	0.0222509	0.116283
1782	0.0924484	0.0452727	0.0152455	0.152967
1783	0.212127	0.0485574	0.020832	0.281516
1784	0.168255	0.0292433	0.0114957	0.208994
1785	-0.00289275	0.0355207	0.0326944	0.0653224
1786	0.1258	0.019139	-0.00161741	0.143322
1787	0.171511	0.0105204	0.0226668	0.204698
1788	0.170099	0.0417903	0.0186991	0.230589
1789	0.082085	0.0682633	0.0153342	0.165682
1790	0.0859793	-0.017859	0.0258035	0.0939238
1791	0.0574153	0.000781399	0.0140679	0.0722646
1792	0.117061	0.0140655	0.00710097	0.138227
1793	0.197634	0.0085284	0.0201088	0.226271
1794	0.149935	0.0400412	0.00832874	0.198305
1795	-0.024847	0.0268828	0.0184031	0.0204389
1796	0.0855557	0.0304853	0.013637	0.129678
1797	0.164597	0.0016951	0.0229217	0.189214
1798	0.141597	0.0530744	0.0150325	0.209704
1799	0.0849507	0.0585922	0.0236324	0.167175
1800	0.0404561	0.000292953	0.0227003	0.0634494
1801	0.0907666	-0.0230421	0.0200364	0.0877609
1802	0.139867	0.0302064	0.0169954	0.187068
1803	0.212344	0.0486108	0.0263937	0.287348
1804	0.19534	0.0241287	0.0164139	0.235883
1805	-0.023349	0.0148558	0.0231879	0.0146947
1806	0.13121	0.0304627	0.0251227	0.186795
1807	0.187886	0.0217283	0.0216337	0.231248
1808	0.164145	0.0568028	0.0216483	0.242596
1809	0.151733	0.0737254	0.0221901	0.247649
1810	0.0987274	0.0181636	0.0226057	0.139497
1811	0.126917	0.0221743	0.0220776	0.171169
1812	0.16218	0.00316189	0.0300314	0.195373
1813	0.20149	0.0551383	0.0175683	0.274196
1814	0.196972	0.0398949	0.0235765	0.260443
1815	-0.0391198	0.0519426	0.0373233	0.0501461
1816	0.134399	0.048216	0.0112962	0.193911
1817	0.166077	0.0333309	0.042598	0.242006
1818	0.160971	0.0614624	0.0202297	0.242664
1819	0.13853	0.04689	0.0337458	0.219166
1820	0.10703	0.0146799	0.0290149	0.150724
1821	0.164664	0.0253991	0.0275687	0.217632
1822	0.20641	0.029576	0.0308971	0.266883
1823	0.236455	0.0770721	0.0199848	0.333512
1824	0.246885	0.0461583	0.0258254	0.318869
1825	0.0192253	0.0567159	0.0326336	0.108575
1826	0.18782	0.037139	0.0305837	0.255543
1827	0.217105	0.0611744	0.021415	0.299694
1828	0.215598	0.0705668	0.0447638	0.330928
1829	0.216451	0.0918838	0.0211452	0.32948
1830	0.15124	0.0479055	0.0180501	0.217196
1831	0.21812	0.0592304	0.0275673	0.304918
1832	0.224163	0.0505993	0.0500776	0.32484
1833	0.309742	0.0726277	0.0348369	0.417206
1834	0.294438	0.053226	0.0397772	0.387441
1835	0.0631504	0.0573598	0.0217169	0.142227
1836	0.2305	0.0589646	0.028257	0.317722
1837	0.266899	0.0440034	0.0412443	0.352147
1838	0.284707	0.08441	0.0359016	0.405019
1839	0.272743	0.0611319	0.0389749	0.37285
1840	0.20571	0.025583	0.0361123	0.267406
1841	0.248099	0.0142	0.0355219	0.297821
1842	0.262096	0.0461435	0.0516116	0.359851
1843	0.3571	0.0278819	0.0345905	0.419573
1844	0.341624	0.0124079	0.0308245	0.384856
1845	0.0947609	-0.0071194	0.0353977	0.123039
1846	0.257832	0.0371554	0.0414888	0.336476
1847	0.345227	-0.0119962	0.0492955	0.382527
1848	0.267742	0.0801043	0.0374821	0.385329
1849	0.318192	0.045143	0.0469584	0.410294
1850	0.232477	0.00426054	0.0540063	0.290744
1851	0.240795	0.0141925	0.0419054	0.296893
1852	0.313875	0.0545784	0.013898	0.382352
1853	0.358149	0.0534287	0.0673177	0.478896
1854	0.4156	0.0239288	0.0392199	0.478748
1855	0.0881412	0.0470244	0.0710339	0.206199
1856	0.342003	0.00370429	0.0292785	0.374986
1857	0.367322	0.00908777	0.0618972	0.438307
1858	0.358104	0.0822688	0.0706157	0.510989
1859	0.375985	0.0495078	0.0510235	0.476516
1860	0.319823	0.0120203	0.0576066	0.38945
1861	0.246746	0.0339839	0.0406035	0.321333
1862	0.30191	0.0390904	0.0469759	0.387977
1863	0.381183	0.0422725	0.0502556	0.473711
1864	0.352458	0.0360948	0.0609225	0.449476
1865	0.0671266	0.0308529	0.0817213	0.179701
1866	0.240498	0.06005	0.0385591	0.339107
1867	0.300151	0.0128346	0.0650065	0.377993
1868	0.275228	0.105476	0.0579944	0.438699
1869	0.288126	0.0436802	0.074134	0.405941
1870	0.170794	0.0213519	0.0590221	0.251168
1871	0.239344	0.0452471	0.0496666	0.334258
1872	0.319717	0.020007	0.0731212	0.412845
1873	0.389863	0.0449597	0.0695862	0.504409
1874	0.435688	0.0501247	0.0734327	0.559245
1875	0.124337	0.0596901	0.0605817	0.244609
1876	0.373354	0.0670713	0.0684858	0.508911
1877	0.460938	0.0271636	0.0801989	0.5683
1878	0.399796	0.102279	0.087528	0.589603
1879	0.462101	0.0212354	0.0751981	0.558534
1880	0.385727	0.000759605	0.0786079	0.465095
1881	0.343179	0.0152605	0.0657571	0.424197
1882	0.41165	0.0231827	0.0533062	0.488139
1883	0.471793	0.0188656	0.0826068	0.573265
1884	0.487741	0.0201571	0.0963968	0.604295
1885	0.20446	0.0661975	0.0804924	0.35115
1886	0.389453	0.0299958	0.0766046	0.496053
1887	0.511409	0.0414782	0.0869576	0.639845
1888	0.525506	0.0755167	0.0922646	0.693287
1889	0.551208	0.0325654	0.084735	0.668509
1890	0.395495	0.0316814	0.0761889	0.503366
1891	0.350626	0.0457204	0.0778008	0.474148
1892	0.470753	0.0334764	0.0864143	0.590644
1893	0.607216	0.0508886	0.0791217	0.737226
1894	0.60273	0.0328429	0.0903312	0.725905
1895	0.338094	0.0739004	0.0845116	0.496506
1896	0.505519	0.0263491	0.0859304	0.617799
1897	0.567131	0.0166356	0.0942793	0.678046
1898	0.575169	0.125478	0.0759083	0.776556
1899	0.61024	0.029748	0.0957638	0.735752
1900	0.473001	0.0470402	0.0769391	0.596981
1901	0.431528	0.028	0.116751	0.576279
1902	0.580399	0.0190121	0.122017	0.721429
1903	0.627759	0.0332834	0.128569	0.789611
1904	0.658664	0.051921	0.0961795	0.806764
1905	0.342208	0.0460636	0.0978603	0.486132
1906	0.516829	0.0392658	0.110867	0.666962
1907	0.612502	0.0574098	0.122997	0.79291
1908	0.622875	0.092266	0.105288	0.820429
1909	0.687746	0.0415282	0.119238	0.848511
1910	0.536159	0.0306797	0.125477	0.692316
1911	0.360005	0.0658212	0.126625	0.552451
1912	0.319875	0.0622686	0.111164	0.493308
1913	0.634632	0.0294337	0.112218	0.776284
1914	0.575648	0.0812289	0.13305	0.789927
1915	0.441833	0.10544	0.134659	0.681932
1916	0.519753	0.122329	0.110994	0.753076
1917	0.61167	0.103198	0.126286	0.841154
1918	0.464582	0.163431	0.110911	0.738924
1919	0.251109	0.102114	0.139843	0.493065
1920	0.355854	0.129069	0.119775	0.604698
1921	0.379929	0.100304	0.14478	0.625013
1922	0.526533	0.135375	0.129317	0.791226
1923	0.603997	0.0726547	0.150318	0.82697
1924	0.475829	0.109227	0.118684	0.703741
1925	0.478383	0.0648085	0.148179	0.691371
1926	0.557883	0.123374	0.116603	0.79786
1927	0.444073	0.157516	0.144456	0.746044
1928	0.607193	0.106929	0.144482	0.858604
1929	0.594336	0.12648	0.142479	0.863296
1930	0.494706	0.0620385	0.15475	0.711494
1931	0.738867	0.075105	0.159129	0.973101
1932	0.55187	0.109196	0.139279	0.800345
1933	0.794503	0.140518	0.146997	1.08202
1934	0.696727	0.15543	0.158385	1.01054
1935	0.771193	0.15159	0.138458	1.06124
1936	0.695411	0.0998243	0.122463	0.917698
1937	0.807565	0.12183	0.145395	1.07479
1938	0.509076	0.176064	0.130824	0.815963
1939	0.921752	0.104039	0.175735	1.20153
1940	0.858027	0.120085	0.152493	1.13061
1941	1.1064	0.113904	0.142253	1.36255
1942	0.972779	0.126812	0.146541	1.24613
1943	1.00951	0.221925	0.13546	1.3669
1944	0.736583	0.131734	0.145789	1.01411
1945	0.899023	0.17124	0.157222	1.22749
1946	0.855796	0.203906	0.179548	1.23925
1947	1.08484	0.258126	0.136778	1.47974
1948	0.903552	0.246128	0.145204	1.29488
1949	0.651186	0.231508	0.159903	1.0426
1950	0.816482	0.250958	0.16094	1.22838
1951	0.868508	0.35574	0.163163	1.38741
1952	0.986843	0.323545	0.150162	1.46055
1953	0.684698	0.331816	0.168729	1.18524
1954	1.08011	0.372726	0.21638	1.66921
1955	1.13505	0.297084	0.190126	1.62226
1956	1.18124	0.445761	0.149753	1.77676
1957	0.771624	0.421436	0.130032	1.32309
1958	0.8231	0.468943	0.181643	1.47369
1959	1.06648	0.416531	0.237066	1.72008
1960	1.20602	0.360825	0.219098	1.78594
1961	0.42452	0.415627	0.222995	1.06314
1962	0.713667	0.406743	0.24589	1.3663
1963	0.677126	0.47733	0.276397	1.43085
1964	0.570111	0.419776	0.198735	1.18862
1965	0.522568	0.359785	0.267854	1.15021
1966	0.596806	0.343689	0.276771	1.21727
1967	0.556002	0.287155	0.302078	1.14523
1968	0.897277	0.223319	0.271144	1.39174
1969	0.74658	0.242649	0.254518	1.24375
1970	0.82698	0.149636	0.295023	1.27164
1971	0.637801	0.200595	0.26781	1.10621
1972	0.716371	0.220872	0.244122	1.18136
1973	0.716954	0.217426	0.206668	1.14105
1974	0.98513	0.193503	0.277034	1.45567
1975	0.610492	0.190286	0.323085	1.12386
1976	1.23559	0.138816	0.285503	1.65991
1977	0.679712	0.176647	0.292349	1.14871
1978	0.937361	0.177514	0.341477	1.45635
1979	0.781498	0.116333	0.335219	1.23305
1980	0.746747	0.112697	0.314746	1.17419
1981	0.710583	0.201042	0.305343	1.21697
1982	1.16192	0.207641	0.282275	1.65183
1983	0.540476	0.1725	0.289169	1.00215
1984	1.2787	0.13444	0.321529	1.73467
1985	1.16822	0.189732	0.362746	1.7207
1986	1.02145	0.184022	0.30645	1.51192
1987	0.984116	0.275965	0.354396	1.61448
1988	0.654565	0.200933	0.370884	1.22638
1989	1.41209	0.237823	0.326019	1.97593
1990	1.14244	0.23595	0.326779	1.70517
1991	0.704575	0.220864	0.292875	1.21831
1992	0.991068	0.203394	0.316694	1.51116
1993	1.25379	0.258063	0.299033	1.81089
1994	0.622803	0.250888	0.259662	1.13335
1995	0.536606	0.145577	0.321034	1.00322
1996	1.07058	0.218019	0.381995	1.6706
1997	0.898435	0.182439	0.317626	1.3985
1998	0.677214	0.259108	0.241141	1.17746
1999	1.1087	0.246997	0.277073	1.63277
2000	1.12539	0.136652	0.346466	1.60851
2001	0.842602	0.0935607	0.281982	1.21814
2002	0.601604	0.0689094	0.277165	0.947678
2003	0.730388	0.249732	0.246038	1.22616
2004	0.894728	0.103224	0.333111	1.33106
2005	0.904706	0.155326	0.349829	1.40986
